# Supplementary material for: Development of small cyclic peptides targeting the CK2α/β interface
Source: Royal Society of Chemistry journal article supplement (doi:10.1039/d2cc00707j), 2022-01-01
Supplement: d2cc00707j1.pdf [file d2cc00707j1.pdf]

**Supporting information**

**Development of small cyclic peptides targeting the CK2 $\alpha$ / $\beta$  interface**

Eleanor L. Atkinson, Jessica Iegre, Claudio D'Amore, Paul D. Brear, Mauro Salvi, Marko Hyvönen and  
David R. Spring.

## Table of contents

|                                                  |    |
|--------------------------------------------------|----|
| 1.1 Figures, Tables and Schemes .....            | 3  |
| 1.2 Chemistry experimental .....                 | 11 |
| 1.2.1 Experimental synthetic details .....       | 12 |
| 1.2.1.1 Small molecules .....                    | 12 |
| 1.2.1.2 Peptides .....                           | 24 |
| 1.3 Molecular modelling of cyclic peptides ..... | 48 |
| 1.4 Ligand efficiency .....                      | 49 |
| 1.5 Biophysical experiments .....                | 49 |
| 1.5.1 Protein expression and purification.....   | 49 |
| 1.5.2 Fluorescence polarisation.....             | 49 |
| 1.5.3 Isothermal titration calorimetry .....     | 49 |
| 1.5.4 X-ray crystallography .....                | 50 |
| 1.6 Cellular biology .....                       | 52 |
| 1.6.1 Cell culture.....                          | 52 |
| 1.6.2 Cell viability assay .....                 | 52 |
| 1.6.3 Serum stability test.....                  | 52 |
| 1.7 References .....                             | 53 |

## 1.1 Figures, Tables and Schemes

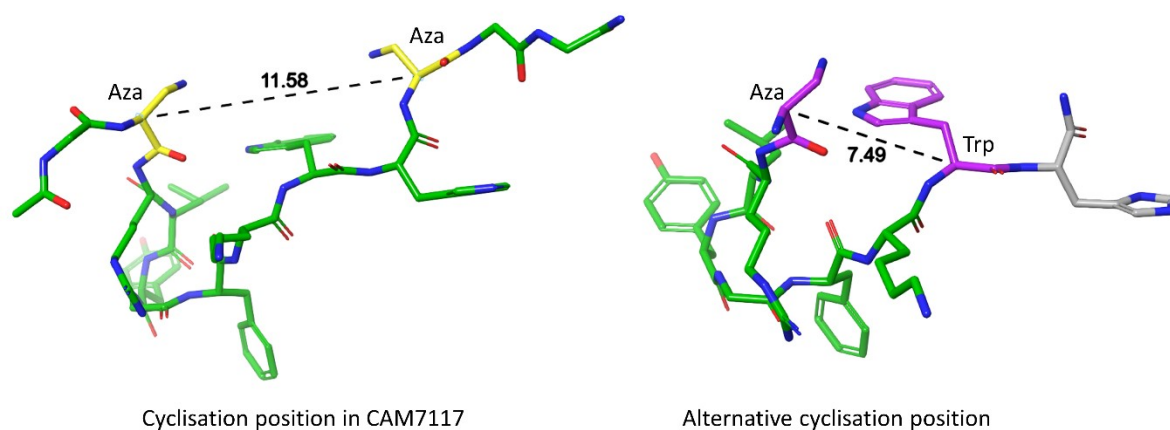

**Fig. S1** Possible cyclisation positions of the central binding sequence of CAM7117. Left: Structure of CAM7117 with constraint removed. Cyclised residues are highlighted in yellow. Right: Alternative cyclisation position depicted on a shortened sequence of CAM7117 (constraint, terminal Gly and Aza-alanine residues removed). Residues able to be cyclised highlighted in purple. Distances shown are between the  $\alpha$ -carbons of the cyclising residues and are in Å. Structures are derived from the crystal structure of CAM7117 bound to CK2 $\alpha$  (PDB: 6Q38).

## Linear peptide FP assay

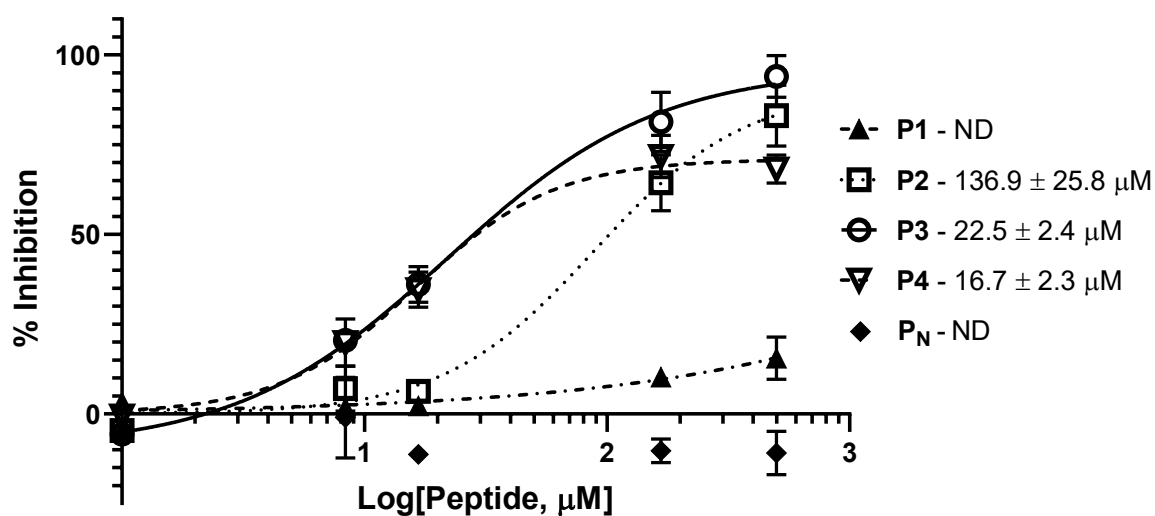

**Fig. S2** Linear peptide FP assay results. The approximate  $\text{IC}_{50}$  values are shown next to the sequence of the peptide  $\pm$  the standard error of the mean (SEM). ND = Non-determinable.  $\text{IC}_{50}$  curves are fitted to  $\log(\text{inhibitor})$  vs response standard curves using either 3 or 4 fitting parameters of GraphPad Prism software. All peptides have an amide at the C-terminus and are acetyl-capped at the N-terminus. All results were recorded in duplicate, on at least two separate occasions. P1 – RLYGFK, P2 – LYGFKW, P3 – RLYGFKW, P4 – RLYGFKWH and P<sub>N</sub> – HWKFGYLR.

**Table S1** Chemical structures of CK2 peptides alongside molecular modelling predictions of the structures of the constraints after minimisation, keeping the peptide sequence in its binding conformation based on the crystal structure of CAM7117 in complex with CK2 $\alpha$  (PDB: 6Q4Q).

| Peptide structure | 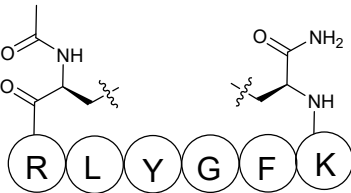  |                                                                                      |
|-------------------|-------------------------------------------------------------------------------------|--------------------------------------------------------------------------------------|
| Constraint        | Structure of constraint                                                             | Modelling                                                                            |
| P6C2              |    |    |
| P6C3              |   |   |
| P5C4              |  |  |
| P5C5              |  |  |

P5C6

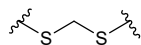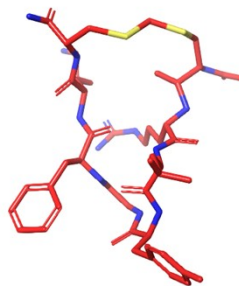

P5C7

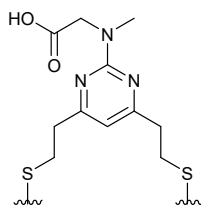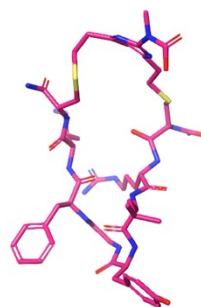

P7C8

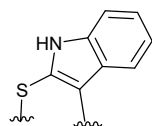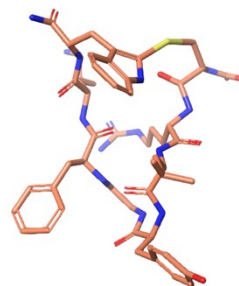

P8C9

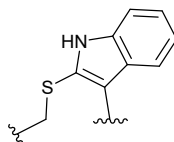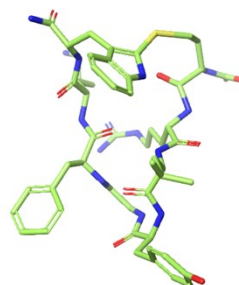

### Cyclic peptide FP assay

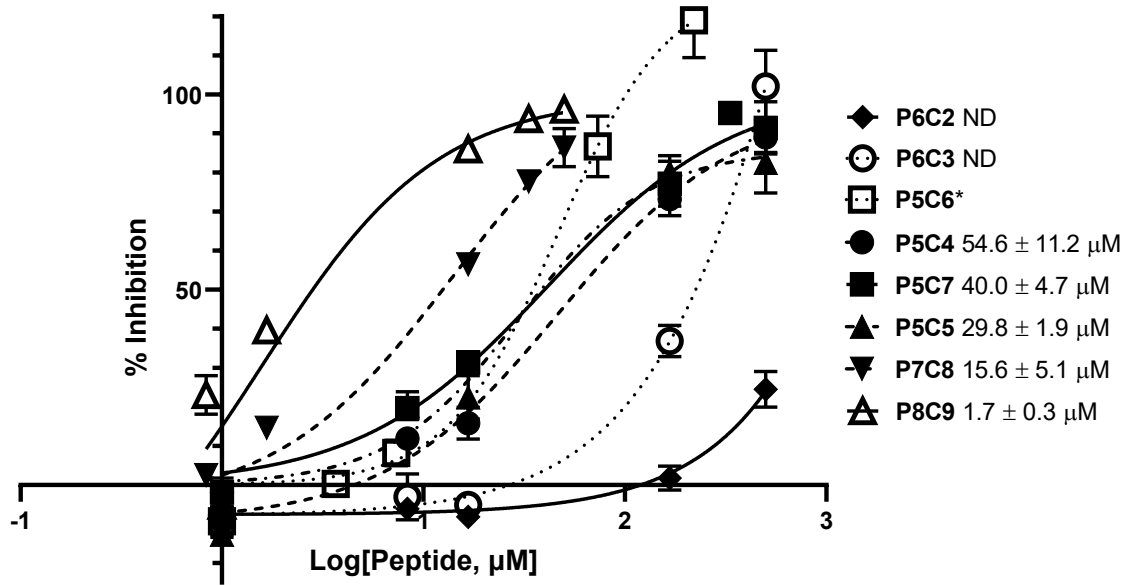

**Fig. S3** Cyclic peptide FP results. IC<sub>50</sub> values are shown in the legend in μM ± SEM. IC<sub>50</sub> curves are fitted to log(inhibitor) vs response standard curves using either 3 or 4 fitting parameters of GraphPad Prism software. All results were recorded in duplicate, on at least two separate occasions. \*IC<sub>50</sub> of P5C6 not determined due to large error and few data points. ND – not determinable.

### Positive controls FP assay

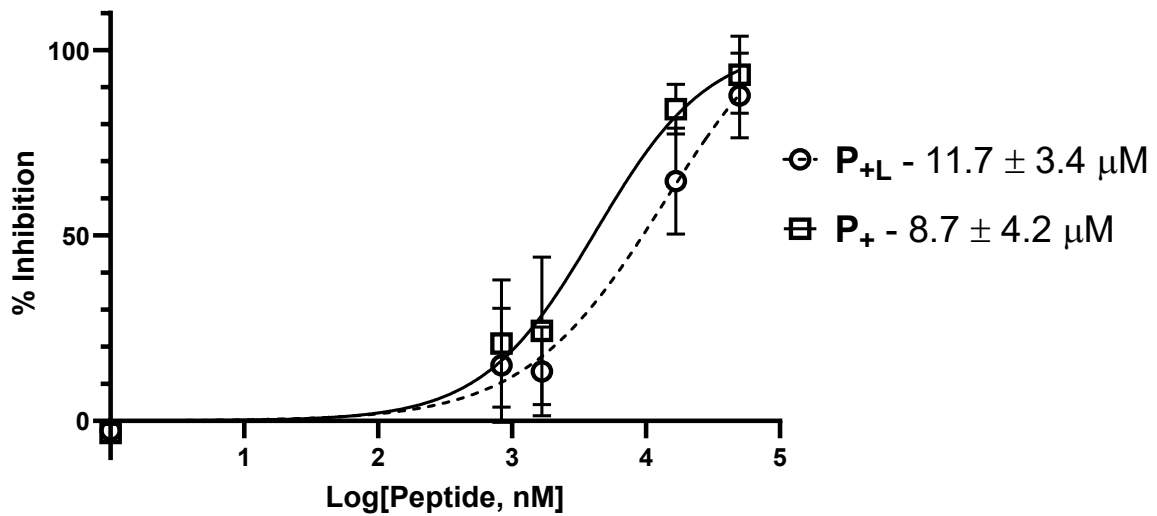

**Fig. S4** Positive controls FP assay results. IC<sub>50</sub> values are shown in the legend ± SEM. IC<sub>50</sub> curves are fitted to log(inhibitor) vs response standard curves using either 3 or 4 fitting parameters of GraphPad Prism software. All results were recorded in duplicate, on at least two separate occasions.

### P8C9, P7C8 and P<sub>+</sub> FP assay

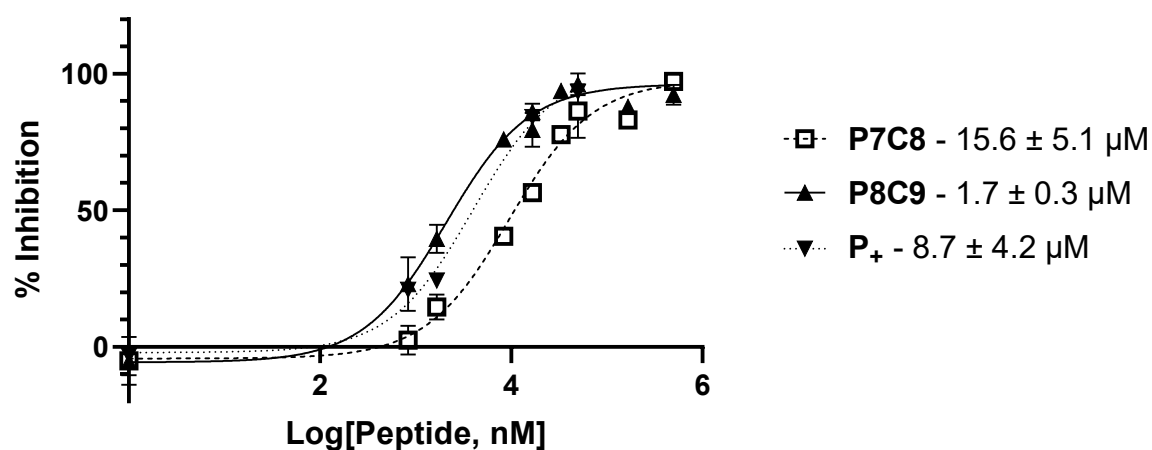

**Fig. S5** P8C9, P7C8 and P<sub>+</sub> FP assay over a larger concentration range. IC<sub>50</sub> values are shown in the legend ± SEM. IC<sub>50</sub> curves are fitted to log(inhibitor) vs response standard curves using either 3 or 4 fitting parameters of GraphPad Prism software. All results were recorded in duplicate, on at least two separate occasions.

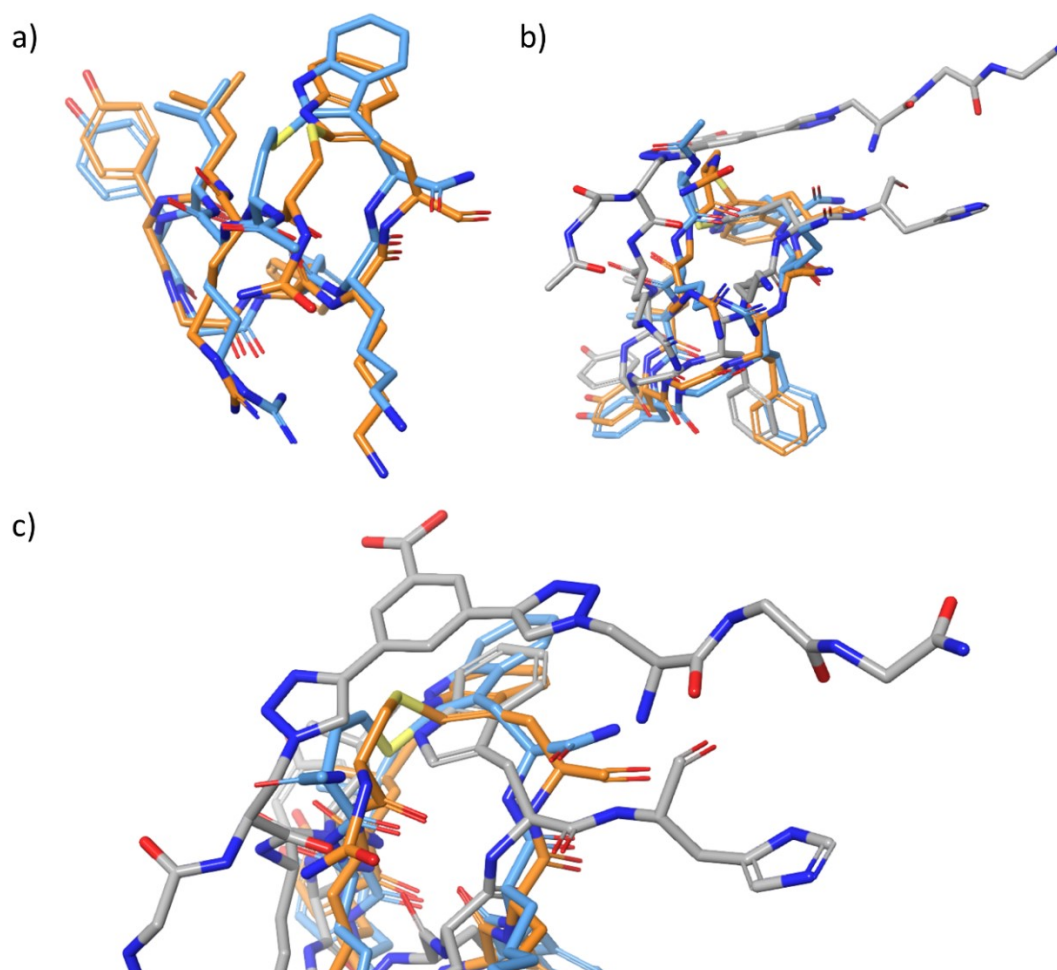

**Fig. S6** Superimposed co-crystal structures of P7C8 (orange, PDB: 7QUX), P8C9 (faded azure, PDB: 6YZH) and P<sub>+</sub> (grey, PDB: 6Q4Q) in complex with CK2α. a) Overlay of the structures of P7C8 and P8C9 indicates that they bind in the same conformation, differing only in the positioning of the Trp ring of the staple. b) Overlay of the structures of P7C8, P8C9 and P<sub>+</sub> confirms that the binding conformation of the central binding sequence of the peptides are the same; additionally, the reduced sizes of P7C8 and P8C9 are evident. c) A close up of the stapling positions of the peptides indicating that Trp residues of all three peptides occupy a very similar position.

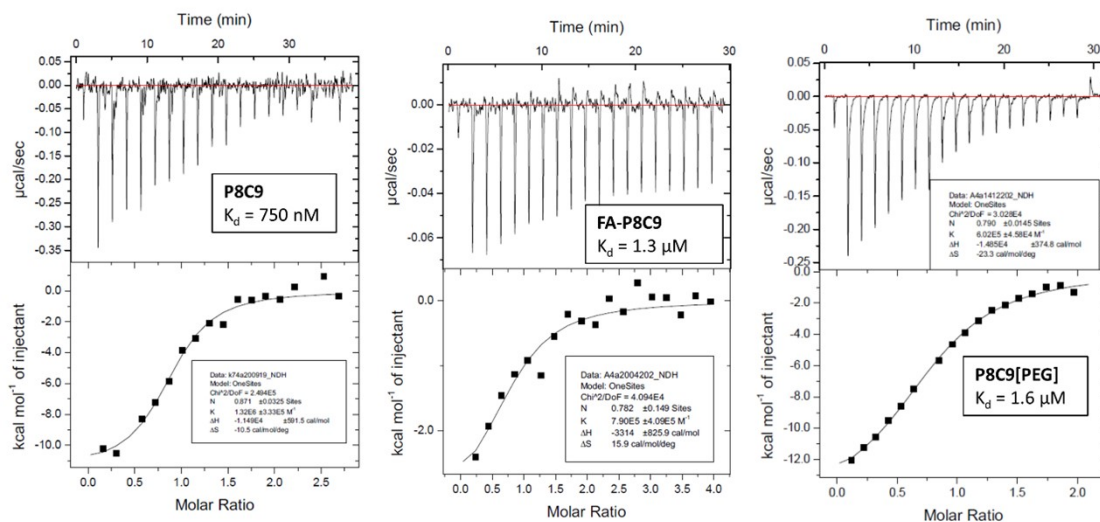

Fig. S7 ITC binding curves of P8C9 binding to CK2α.

## Serum stability test

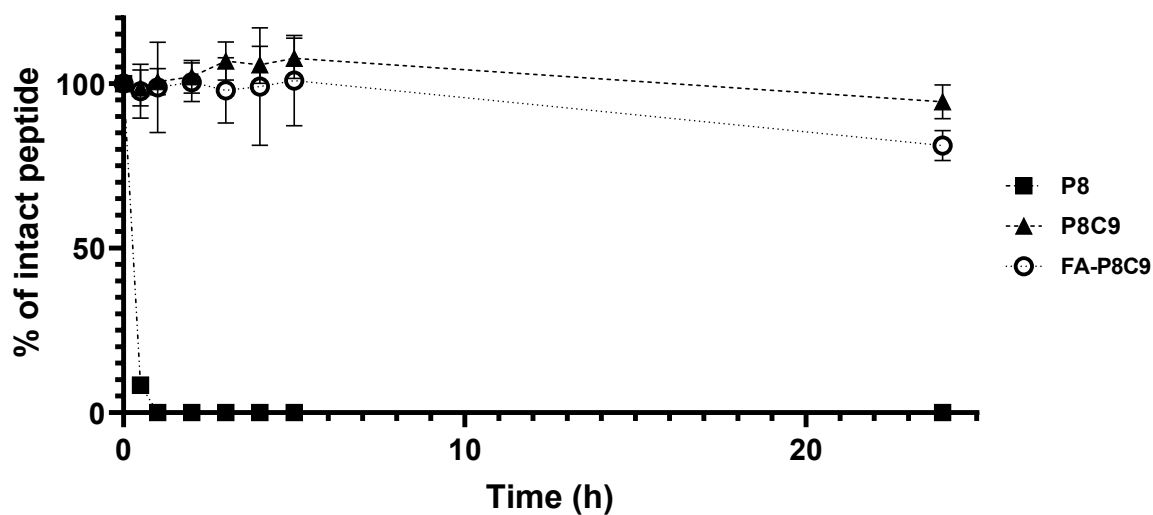

Fig. S8 Serum stability test of P8, P8C9 and FA-P8C9.

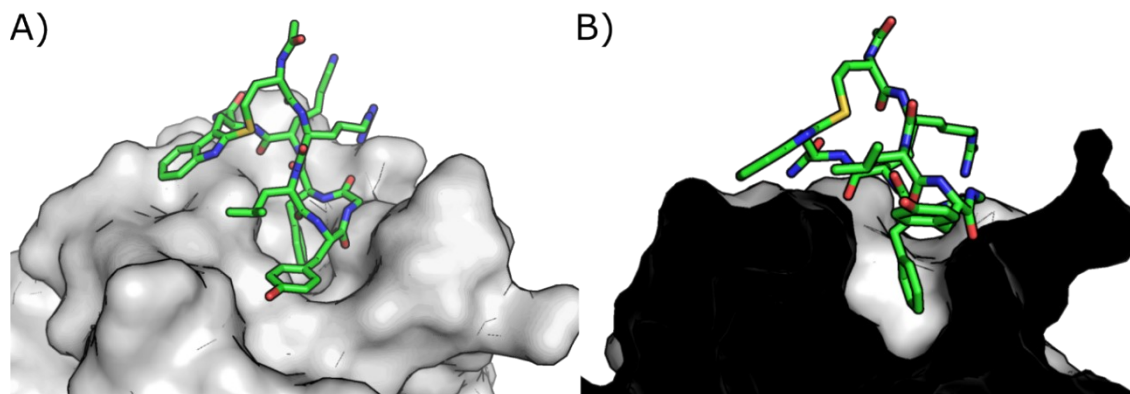

Fig. S9 X-ray co-crystal structure of P8C9 in complex with CK2α (PDB: 6YZH). A) Binding conformation of P8C9. B) Phe residue of P8C9 binds in the Phe-pocket of CK2α.



### P8 and P8C9 effect on cell viability

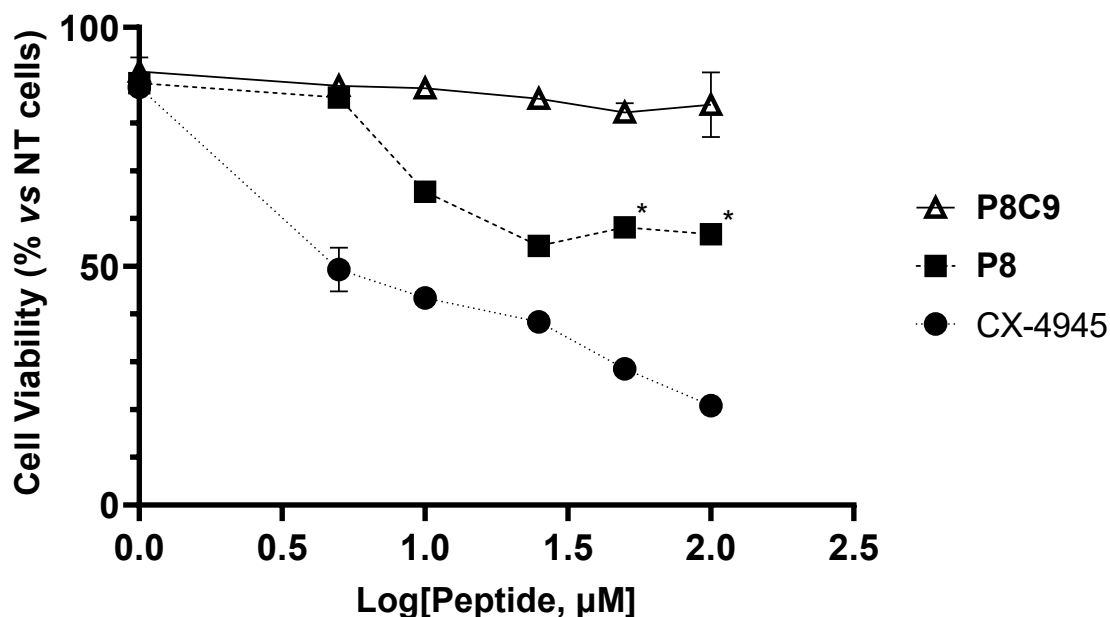

Fig. S10 P8C9 and P8 MTT assay results. Cell viability is quantified as the percentage of viable cells remaining compared to the number of viable cells remaining for non-treated cells. CX-4945 is used as a positive control. The MTT assay was conducted in HeLa cells and the cells were incubated with the peptides for 48 h before analysis. \*Peptide was seen to precipitate at these concentrations and thus, these results are unreliable.

### FA-PEG derivatives of P8C9 cell viability assay

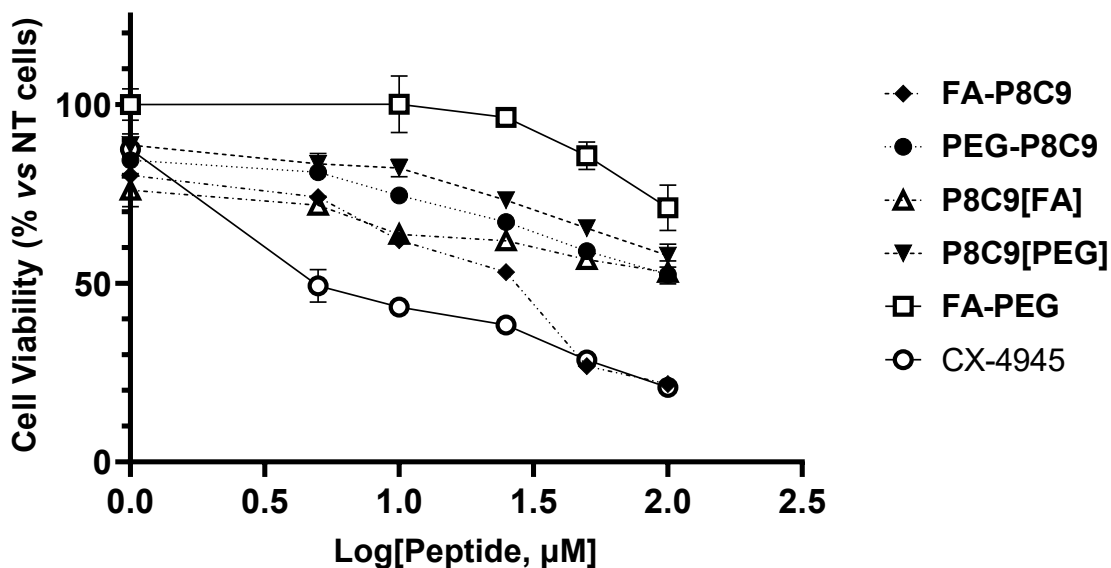

Fig. S11 FA-P8C9, PEG-P8C9, P8C9[FA], P8C9[PEG] and FA-PEG MTT assay results. Cell viability is quantified as the percentage of viable cells remaining compared to the number of viable cells remaining for non-treated cells. CX-4945 is used as a positive control. The MTT assay was conducted in HeLa cells and the cells were incubated with the peptides for 48 h before analysis. Results were collected in quadruplicate on one or more occasions.

### TAT-P8C9 and R3-P8C9 effect on cell viability

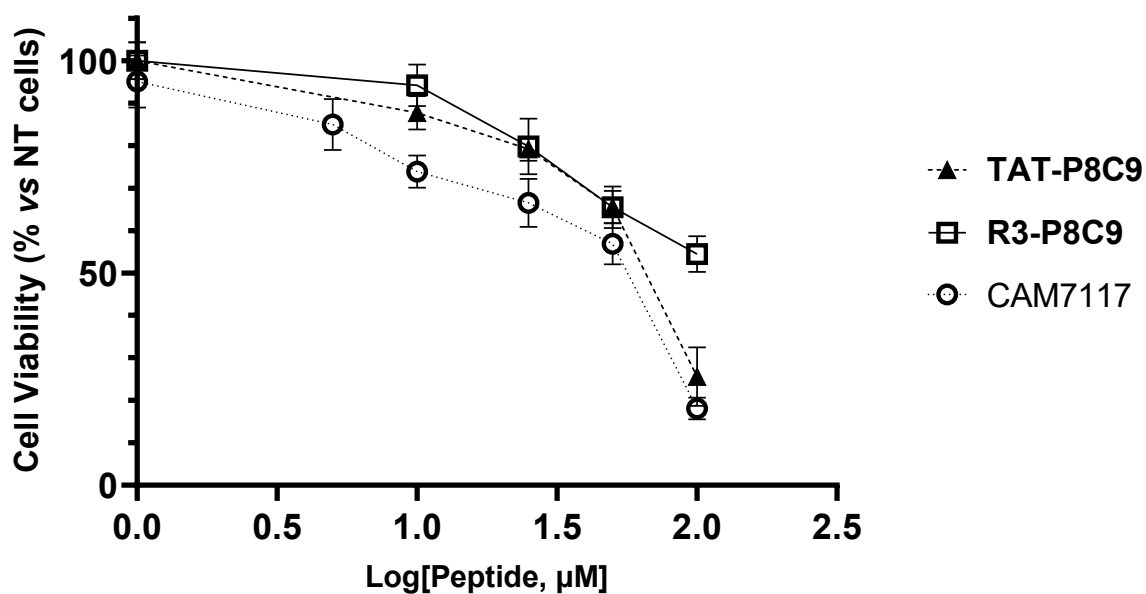

Fig. S12 TAT-P8C9 and R3-P8C9 MTT assay results. Cell viability is quantified as the percentage of viable cells remaining compared to the number of viable cells remaining for non-treated cells. CAM7117 is used as a positive control. The MTT assay was conducted in HeLa cells and the cells were incubated with the peptides for 48 h before analysis. Results were collected in quadruplicate on two separate occasions.

### TAT-(Ahx)<sub>2</sub> and R3-(Ahx)<sub>2</sub> effect on cell viability

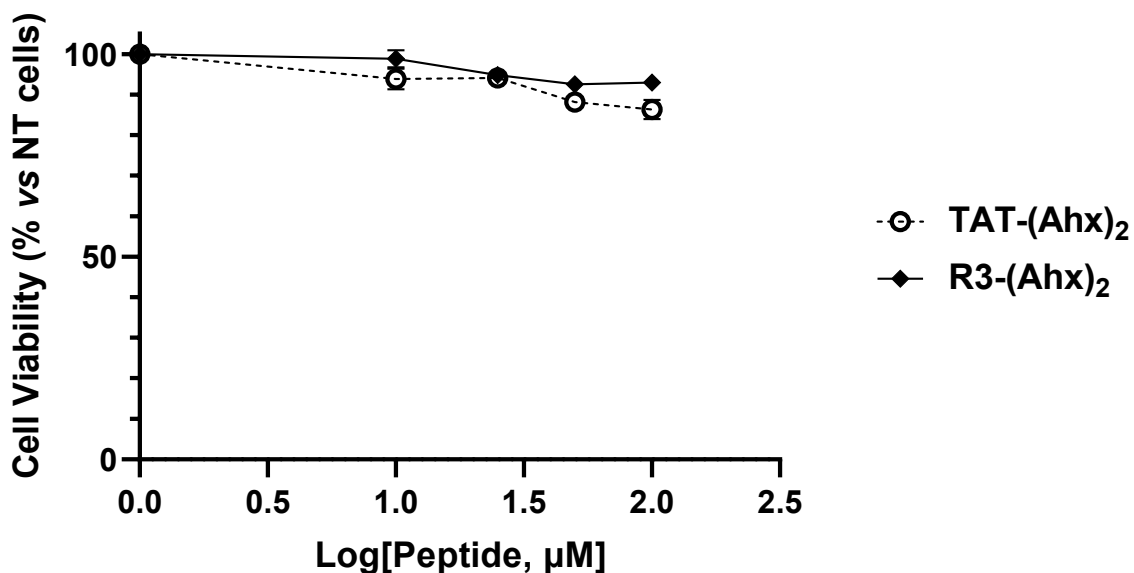

Fig. S13 TAT-(Ahx)<sub>2</sub> and R3-(Ahx)<sub>2</sub> MTT assay results. Cell viability is quantified as the percentage of viable cells remaining compared to the number of viable cells remaining for non-treated cells. The MTT assay was conducted in HeLa cells and the cells were incubated with the peptides for 48 h before analysis. Results were collected in quadruplicate on two separate occasions.

## 1.2 Chemistry experimental

All experiments were carried out in oven-dried glassware under an atmosphere of N<sub>2</sub> using distilled solvents unless otherwise stated.

Reagents: Chemicals were purchased from commercial sources and used without further purification.

Yield: refers to chromatographically and spectroscopically pure compounds unless otherwise stated and are reported as follows: mass, moles, percentage

Temperature: Reaction temperatures of 0 °C were maintained using an ice-water bath; room temperature (rt) refers to 20-25 °C.

Flash chromatography: Analytical thin layer chromatography was carried out on SiO<sub>2</sub> Merck Kieselgel 60 F254 plates with visualisation either by ultraviolet light or by staining with potassium permanganate or ninhydrin dips made using standard procedures. Retention factors (*R<sub>f</sub>*) are quoted to 0.01. Flash column chromatography was performed using silica gel 60 (230-400 mesh) under a positive pressure of N<sub>2</sub>. Eluent systems are expressed in % v/v.

Nuclear Magnetic Resonance (NMR): <sup>1</sup>H and <sup>13</sup>C NMR spectra were recorded using an internal deuterium lock at ambient probe temperatures on the following instruments: Bruker Avance III 400 MHz HD Smart Probe Spectrometer, Bruker Avance III 400 MHz HD Spectrometer, Bruker 400 MHz QNP Cryoprobe Spectrometer, Bruker 500 MHz DCH Cryoprobe Spectrometer, Bruker Avance III 500 MHz HD Smart Probe Spectrometer. The following deuterated solvents were used: chloroform (CDCl<sub>3</sub>) and dimethylsulfoxide (DMSO-d<sub>6</sub>). <sup>1</sup>H-NMR chemical shifts ( $\delta$ ) are quoted in ppm to the nearest 0.01 ppm, relative to the residual non-deuterated solvent peak and coupling constants (*J*) are quoted to the nearest 0.1 Hertz (Hz). <sup>13</sup>C-NMR chemical shifts are quoted to the nearest 0.1 ppm, relative to the solvent peak and coupling constants are quoted to the nearest 0.1 Hz. Spectral data is reported as follows: chemical shift, integration, multiplicity (s, singlet; d, doublet; t, triplet; m, multiplet; br, broad; or as a combination of these e.g. br s), coupling constant(s) and assignment. The numbering system used in the assignments does not necessarily follow the IUPAC convention. Assignment of all spectra is supported by DEPT, COSY, HSQC and HMBC or by analogy to fully assigned spectra of closely related compounds.

Infrared spectroscopy (IR): Infrared spectra were recorded neat on a Perkin Elmer Spectrum One FT-IR spectrometer fitted with an Attenuated Total Reflectance (ATR) sampling accessory. Selected absorption maxima ( $\nu_{\text{max}}$ ) are quoted in wavenumbers (cm<sup>-1</sup>) with the following abbreviations: w, weak; m, medium; s, strong; vs, very strong.

Liquid chromatography-mass spectrometry (LCMS): LCMS was carried out using a Waters ACQUITY H-Class UPLC with an ESCi Multi-Mode Ionisation Waters SQ Detector 2 spectrometer using MassLynx 4.1 software; EI refers to the electrospray ionisation technique; LC system: solvent A: 2 mM NH<sub>4</sub>OAc in H<sub>2</sub>O/MeCN (95:5); solvent B: MeCN; solvent C: 2% formic acid; column: ACQUITY UPLC® CSH C18 (2.1 mm × 50 mm, 1.7 μm, 130 Å) at 40 °C; gradient: 5 – 95% B with constant 5% C over 1 min at flow rate of 0.6 mL/min; Injection volume: 5 μL. Chromatographs were monitored by absorbance using diode array detection at a wavelength range of 190-600 nm, interval 1.2 nm.

Analytical HPLC: Chromatographs were obtained on an Agilent 1260 Infinity using a Supelcosil ABZ+PLUS column (150 mm × 4.6 mm, 3 μm) eluting with a linear gradient system (solvent A: 0.05% (v/v) TFA in water, solvent B: 0.05% (v/v) TFA in MeCN) over 15 min, unless otherwise stated, at a flow rate of 1 mL/min. HPLC was monitored by UV absorbance at 220 and 254 nm.

Preparative HPLC: Preparative HPLC was carried out on an Agilent 1260 Infinity using a Supelcosil ABZ+PLUS column (250 mm × 21.2 mm, 5 μm) eluting with a linear gradient system (solvent A: 0.1% (v/v) TFA in water, solvent B: 0.05% (v/v) TFA in MeCN) over 20 min at a flow rate of 20 mL/min. HPLC was monitored by UV absorbance at 220 and 254 nm.

Melting points: Melting points were measured using a Büchi melting point B545 apparatus and are uncorrected.

### 1.2.1 Experimental synthetic details

#### 1.2.1.1 Small molecules

##### (S)-2-(9-Fluorenylmethoxycarbonylamino)-3-azidopropanoic acid (Fmoc-Aza-OH) (1)

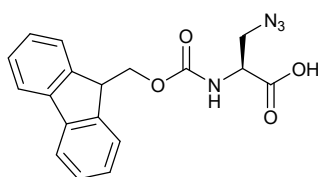

Fmoc-Asn-OH (4.0 g, 11.3 mmol, 1 equiv) was added to a solution of [bis(trifluoroacetoxy)iodo]benzene (5.4 g, 17.0 mmol, 1.5 equiv) in DMF/H<sub>2</sub>O (2:1, 53.2 mL: 26.4 mL). After 15 min, pyridine (2.1 mL, 17.1 mmol, 1.5 equiv) was added and the mixture was stirred at rt for 16 h. The solvent was removed *in vacuo* and the oily residue was dissolved in H<sub>2</sub>O (60 mL). Concentrated HCl (2 mL) was added and the solution washed with diethyl ether. The aqueous phase was adjusted to pH 6 with 2 M aqueous NaOH solution and the resulting precipitate was filtered, washed with H<sub>2</sub>O, ice-cold EtOH and diethyl ether, and dried *in vacuo* to give Fmoc-Dap-OH as a beige powder (2.86 g, 8.8 mmol, 78%). The intermediate was used without further purification. Fmoc-Dap-

OH (2.86 g, 8.8 mmol, 1 equiv) was added to a mixture of H<sub>2</sub>O (60 mL), MeOH (180 mL), and CH<sub>2</sub>Cl<sub>2</sub> (120 mL). CuSO<sub>4</sub>·5H<sub>2</sub>O (14 mg, 0.06 mmol, 0.007 equiv) and 1-(azidosulfonyl)-1H-imidazol-3-ium hydrogen sulfate (**2**) (5.39 g, 21.1 mmol, 2.4 equiv) were added, the mixture adjusted to pH 9 with saturated K<sub>2</sub>CO<sub>3</sub> and stirred for 18 h. The mixture was then diluted with CH<sub>2</sub>Cl<sub>2</sub> (120 mL), and the aqueous phase isolated. The organic phase was extracted with saturated aqueous NaHCO<sub>3</sub> (2×200 mL) and the organic layers discarded. The aqueous extract was then washed with Et<sub>2</sub>O (2×200 mL), the aqueous extract acidified to pH 2 with conc. HCl and extracted again with Et<sub>2</sub>O (3×240 mL). The organic extracts were dried over anhydrous MgSO<sub>4</sub> and the solvent removed *in vacuo* to yield the title compound as a beige, amorphous solid (1.33 g, 3.77 mmol, 37%).

**R<sub>f</sub>** = 0.09 (10% MeOH/DCM); **mp** 121-123 °C (lit. 123-125 °C)<sup>1</sup>; **[α]<sub>D</sub><sup>25</sup>** = -7.0 ° (DMF, concentration = 1 g/100 mL) (lit. **[α]<sub>D</sub><sup>25</sup>** = -10.3 ° (DMF, concentration = 1 g/100 mL));<sup>2</sup> **v<sub>max</sub>** (cm<sup>-1</sup>) 2106 (m, N=N=N), 1705 (s, C=O), 1687 (s, C=O), 1536 (s, C=C); **δ<sub>H</sub>** (400 MHz, CDCl<sub>3</sub>) 3.78-3.86 (2H, m), 4.24 (1H, t, *J*=6.9 Hz), 4.40-4.48 (2H, m), 4.58-4.60 (1H, m), 5.64 (1H, d, *J*=7.4 Hz), 7.32 (2H, t, *J*=7.4 Hz), 7.41 (2H, t, *J*=7.4 Hz), 7.59 (2H, d, *J*=6.9 Hz), 7.77 (2H, d, *J*=7.4 Hz); **δ<sub>C</sub>** (100 MHz, CDCl<sub>3</sub>) 47.2, 52.4, 53.7, 67.6, 120.2, 125.2, 127.3, 128.0, 141.46, 143.6, 156.0, 173.3; **LCMS** (ESI<sup>+</sup>): *m/z* found [M-H]<sup>-</sup> 352.4.

Data in accordance with literature.<sup>1,2</sup>

### 1-(azidosulfonyl)-1H-imidazol-3-ium hydrogen sulfate (**2**)

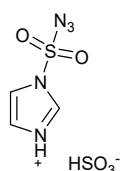

Sulfuryl chloride (16.1 mL, 200 mmol, 1 equiv) was added dropwise to an ice-cold suspension of NaN<sub>3</sub> (13.0 g, 200 mmol, 1 equiv) in CH<sub>3</sub>CN (200 mL) and the mixture stirred for 16 h. Imidazole (25.9 g, 380 mmol, 1.9 equiv) was added and the pink mixture stirred at 0 °C for 5 h. The mixture was then diluted with ethyl acetate (400 mL) and H<sub>2</sub>O (400 mL). The organic fraction was isolated and washed with H<sub>2</sub>O (400 mL) and saturated aqueous NaHCO<sub>3</sub> (2 x 200 mL), dried over anhydrous MgSO<sub>4</sub> and the solvent reduced to 200 mL *in vacuo*. A solution of conc. H<sub>2</sub>SO<sub>4</sub> (11 mL, 200 mmol, 1 equiv) in ethyl acetate (100 mL) was added to the ice-cold reaction mixture over 30 min. The reaction mixture was warmed to rt and stirred for 16 h. The precipitate was filtered off, washed with ethyl acetate (3 x 60 mL) and dried *in vacuo* to yield the title compound as a white powder (25.3 g, 93 mmol, 47%).

**R<sub>f</sub>** = 0.15 (20% EtOAc/petroleum ether 40:60); **mp** 103-107 °C (lit. 102-105 °C)<sup>3</sup>; **v<sub>max</sub>** (cm<sup>-1</sup>) 2178 (m, N=N=N), 1586 (m, C=C), 1430 (s, S=O); **δ<sub>H</sub>** (400 MHz, DMSO-d<sub>6</sub>) 7.52 (1H, s), 8.04 (1H, s), 9.11 (1H, s), 11.94-12.08 (3H, br s, expected 1H), 14.24 (1H, br s); **δ<sub>C</sub>** (100 MHz, DMSO-d<sub>6</sub>) 120.1, 127.6, 138.7. Extra

peaks at 7.57 and 8.95 ppm in the  $^1\text{H}$  NMR spectrum, and at 111.9 and 134.9 in the  $^{13}\text{C}$  NMR spectrum arise from the compound partially decomposing in  $\text{DMSO-d}_6$  to form 1,3H-imidazol-1-ium salts; **LCMS** ( $\text{ESI}^+$ )  $m/z$  found  $[\text{M}+\text{H}]^+$  174.3.

Data in accordance with literature.<sup>3</sup>

### Methyl 3,5-bis((trimethylsilyl)ethynyl)benzoate (3)

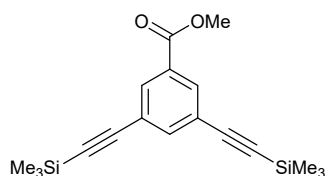

Trimethylsilylacetylene (6 mL, 42.2 mmol, 13.6 equiv) was added to a stirring mixture of methyl 3,5-dibromobenzoate (900 mg, 3.10 mmol, 1 equiv),  $\text{Pd}_2(\text{dba})_3$  (54 mg, 0.06 mmol, 2 mol%) and triphenylphosphine (77 mg, 0.29 mmol, 9 mol%) in dry triethylamine (15 mL). The reaction mixture was refluxed for 16 h under  $\text{N}_2$ . The solvent was removed *in vacuo*, the residue diluted with EtOAc and washed with  $\text{H}_2\text{O}$ . The organic phase was dried over anhydrous  $\text{MgSO}_4$  and the crude residue purified by flash column chromatography on silica gel eluting with 0-5% EtOAc in petroleum ether 40-60 to afford the title compound as a yellow solid (954 mg, 2.90 mmol, 94%).

$R_f$  = 0.71 (20% EtOAc/petroleum ether 40:60); **mp** 76-78 °C (lit. 73-75 °C);<sup>4</sup>  $\nu_{\text{max}}$  ( $\text{cm}^{-1}$ ) 2955 (w,  $\text{C}\equiv\text{CH}$ ), 1730 (s,  $\text{C}=\text{O}$ ), 1588 (w,  $\text{C}=\text{C}$ ), 1247 (s, Si-C);  $\delta_{\text{H}}$  (400 MHz,  $\text{DMSO-d}_6$ ) 0.27 (18H, s), 3.94 (3H, s), 7.75 (1H, t,  $J=1.5$  Hz), 8.06 (2H, d,  $J=1.5$  Hz);  $\delta_{\text{C}}$  (100 MHz,  $\text{DMSO-d}_6$ ) 0.0, 52.6, 96.3, 103.1, 124.1, 130.7, 132.8, 139.2, 165.9; **LCMS** ( $\text{ESI}^+$ )  $m/z$  found  $[\text{M}-\text{OMe}]^+$  297.4.

Data in accordance with literature.<sup>4</sup>

### 3,5-Diethynylbenzoic acid (4)

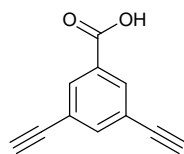

Aqueous 6M KOH (4.31 mL, 25 mmol, 10 equiv) was added to a stirred solution of methyl 3,5-bis((trimethylsilyl)ethynyl)benzoate (850 mg, 2.59 mmol, 1 equiv) in MeOH (5 mL). The mixture was stirred at rt for 18 h. MeOH was removed under a stream of  $\text{N}_2$ , the residue partitioned between EtOAc and  $\text{H}_2\text{O}$  and the aqueous phase acidified to pH 4 with 6M aqueous HCl. The aqueous phase was extracted with EtOAc (3x5 mL) and the solvent removed *in vacuo* to afford the title compound as an orange solid (403 mg, 2.37 mmol, 92%).

$R_f$  = 0.32 (10% MeOH/DCM); **mp** 168 °C decomposed (lit. 173 °C decomposed);<sup>5</sup>  $\nu_{\max}$  ( $\text{cm}^{-1}$ ) 3286 (m, C $\equiv$ CH), 1683 (vs, C=O), 1588 (s, C=C);  $\delta_{\text{H}}$  (400 MHz, DMSO- $d_6$ ) 4.37 (2H, s), 7.79 (1H, t,  $J$ =1.6 Hz), 7.94 (2H, d,  $J$ =1.6 Hz);  $\delta_{\text{C}}$  (100 MHz, DMSO- $d_6$ ) 81.9, 83.1, 123.3, 132.5, 132.9, 138.7, 166.1; **LCMS** (ESI $^-$ )  $m/z$  found [M-H] $^-$  169.3.

Data in accordance with literature.<sup>5</sup>

#### ***N*-(2-(2-(2-amino-2-oxoethoxy)ethoxy)ethyl)dodecanamide (5)**

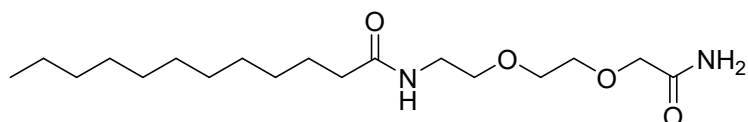

*N*-(2-(2-(2-amino-2-oxoethoxy)ethoxy)ethyl)dodecanamide was synthesised using automated SPPS as outlined in section 1.2.1.2, using rink amide resin (0.1 mmol scale), {2-[2-(Fmoc-amino)ethoxy]ethoxy}acetic acid and dodecanoic acid. The compound was cleaved from the resin using TFA/TIPS/CH<sub>2</sub>Cl<sub>2</sub>/H<sub>2</sub>O and the crude product purified by flash column chromatography (10% MeOH/CH<sub>2</sub>Cl<sub>2</sub>) to yield the product as a white amorphous solid (30.8 mg, 0.089 mmol, 89.4% yield).

$R_f$  = 0.44 (10% MeOH/CH<sub>2</sub>Cl<sub>2</sub>); **mp** 92 – 94 °C;  $\nu_{\max}$  ( $\text{cm}^{-1}$ ) 3305 (m, N-H) 1662 (s, C=O) 1636 (vs, C=O) 1553 (m, N-H) 1109 (s, C-O);  $\delta_{\text{H}}$  (400 MHz, CDCl<sub>3</sub>) 0.87 (3H, t,  $J$  = 7.0 Hz) 1.25 – 1.29 (20 H, bm) 1.60 – 1.63 (2H, bm) 2.18 (2H, t,  $J$  = 7.6 Hz) 3.46 – 3.57 (4H, bms) 3.63 – 3.72 (4H, bms) 4.01 (2H, s) 5.67 (1H, bs) 5.93 (1H, bs) 6.84 (1H, bs);  $\delta_{\text{C}}$  (100 MHz, CDCl<sub>3</sub>) 14.1, 22.7, 25.7, 29.3 – 29.6, 31.9, 36.7, 39.1, 70.1 – 71.0, 172.9, 173.5; **LCMS** (ESI $^+$ )  $m/z$  found [M+H] $^+$  345.2; **HRMS** (ESI $^+$ )  $m/z$  [M+Na] $^+$  calculated for C<sub>18</sub>H<sub>36</sub>N<sub>2</sub>O<sub>4</sub>: 367.2567; found: 367.2570 ( $\Delta$  = 0.7 ppm).

#### **Ethyl *N*-(4,6-dichloropyrimidin-2-yl)-*N*-methylglycinate (6)**

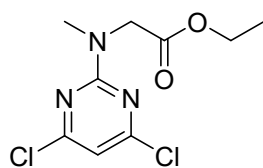

To a solution of 2,4,6-trichloropyrimidine (1.00 g, 5.45 mmol, 1 equiv) in acetone (6 mL) at 0 °C was added sarcosine ethyl hydrochloride (1.01 g, 6.54 mmol, 1.2 equiv) followed by dropwise addition of triethylamine (1.90 mL, 13.6 mmol, 2.5 equiv) and the reaction mixture was stirred at 0 °C for 2 h and then at rt for 12 h. Upon completion, the solvent was removed *in vacuo* then redissolved in H<sub>2</sub>O (20 mL) and extracted with CH<sub>2</sub>Cl<sub>2</sub> (4 × 20 mL). The combined organic fractions were dried (MgSO<sub>4</sub>), concentrated *in vacuo* and the crude residue purified by FCC (2-20% EtOAc/PE) to yield the product (200 mg, 0.80 mmol, 14%) as a clear oil.

$R_f = 0.30$  (10% EtOAc/PE 40-60);  $\delta_H$  (400 MHz,  $CDCl_3$ ) 6.61 (s, 1H), 4.35 (s, 2H), 4.23 (q, 2H,  $J = 7.2$  Hz), 3.58 (s, 3H), 1.30 (t, 3H,  $J = 7.2$  Hz) ppm; **HRMS** (ESI<sup>+</sup>)  $m/z$  found  $[M+H]^+$  264.0299,  $C_9H_{12}Cl_2N_3O_2^+$  required 264.0307.

Data in accordance with literature procedure.<sup>6</sup>

#### Ethyl *N*-(4,6-divinylpyrimidin-2-yl)-*N*-methylglycinate (**7**)

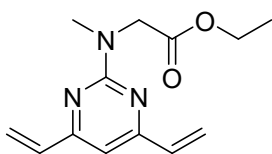

**6** (180 mg, 0.638 mmol, 1 equiv), potassium vinyltrifluoroborate (581 mg, 4.34 mmol, 6.8 equiv),  $Pd(dppf)Cl_2 \cdot CH_2Cl_2$  (73 mg, 0.10 mmol, 0.15 equiv) and  $K_2CO_3$  (660 mg, 4.08 mmol, 6.4 equiv) in THF/ $H_2O$  (10:1, 4.8 mL) were refluxed at 70 °C for 16 h. Upon completion, the reaction mixture was filtered through Celite<sup>®</sup>, washed with EtOAc and the solvent removed *in vacuo*. The resulting residue was purified by FCC (0-4% EtOAc/PE 40-60) to yield **7** (150 mg, 0.60 mmol, 95%) as an off-white solid.<sup>a</sup>

$R_f = 0.30$  (10% EtOAc/PE 40-60);  $\delta_H$  (400 MHz,  $CDCl_3$ ) 6.64-6.57 (m, 2H), 6.51 (s, 1H), 6.40 (d, 2H,  $J = 17.2$  Hz), 5.55 (dd, 2H,  $J = 10.5, 1.0$  Hz), 4.38 (s, 2H), 4.19 (q, 2H,  $J = 7.1$  Hz), 3.34 (s, 3H), 1.30-1.24 (m, 3H) ppm; **HRMS** (ESI<sup>+</sup>)  $m/z$  found  $[M+H]^+$  248.1397,  $C_{13}H_{18}N_3O_2^+$  required 248.1399.

Data in accordance with literature procedure.<sup>6</sup>

#### *N*-(4,6-Divinylpyrimidin-2-yl)-*N*-methylglycine (**8**)

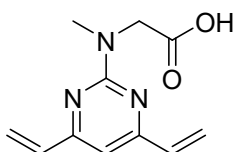

To a solution of **7** (160 mg, 0.65 mmol, 1 equiv) in THF/ $H_2O$  (1:1, 6 mL) was added  $LiOH \cdot H_2O$  (90 mg, 2.14 mmol, 3.3 equiv) and the reaction mixture stirred at rt for 18 h. Upon completion, the mixture was diluted with  $H_2O$  (10 mL) and washed with  $Et_2O$  (10 mL). The aqueous phase was neutralized with 1M HCl and extracted with  $CH_2Cl_2$  (4 × 20 mL). The combined organic fractions were dried ( $MgSO_4$ ) and concentrated *in vacuo*. The crude residue was triturated with PE 40-60 to yield **8** (100 mg, 0.45 mmol, 70%) as a pale yellow solid.

<sup>a</sup> The pure product was dissolved straightaway in THF/ $H_2O$  (2 mL) for the next step.



$\delta_{\text{H}}$  (400 MHz, CDCl<sub>3</sub>) 6.67-6.60 (m, 3H), 6.42 (dd, 2H,  $J = 17.3, 0.8$  Hz), 5.66 (dd, 2H,  $J = 10.6, 1.2$  Hz), 4.32 (s, 2H), 3.40 (s, 3H) ppm; LCMS (ESI<sup>+</sup>) 220.1 [M+H]<sup>+</sup>.

Data in accordance with literature procedure.<sup>6</sup>

### 1.2.1.1.1 $^1\text{H}$ and $^{13}\text{C}$ NMR

1

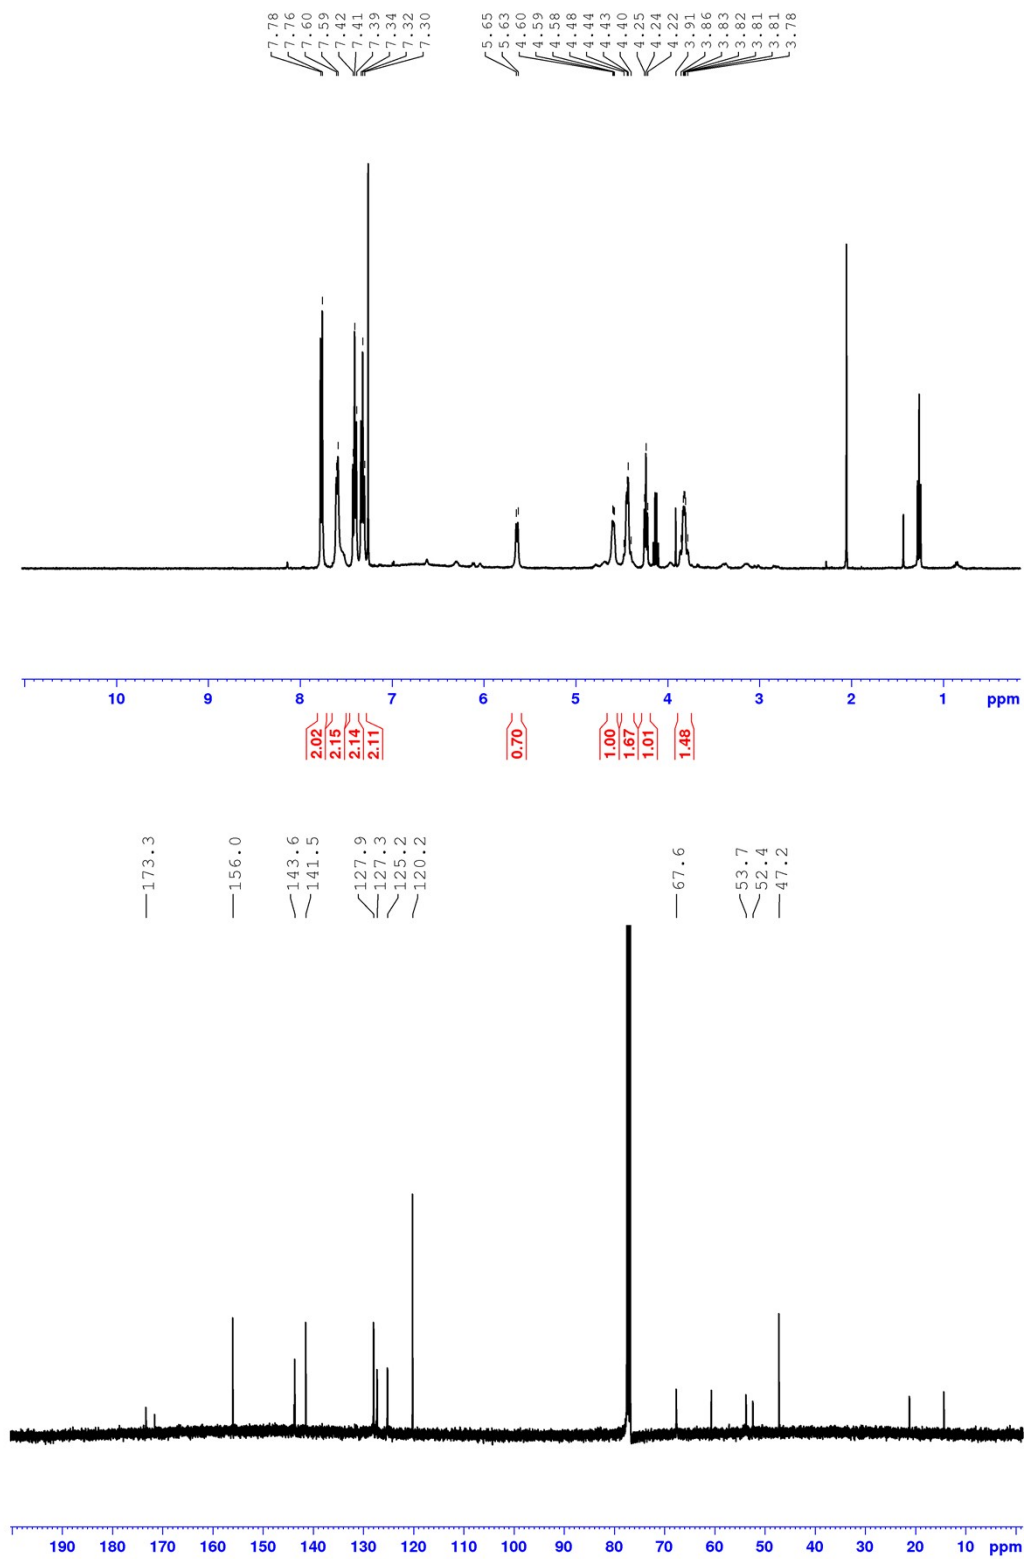

2

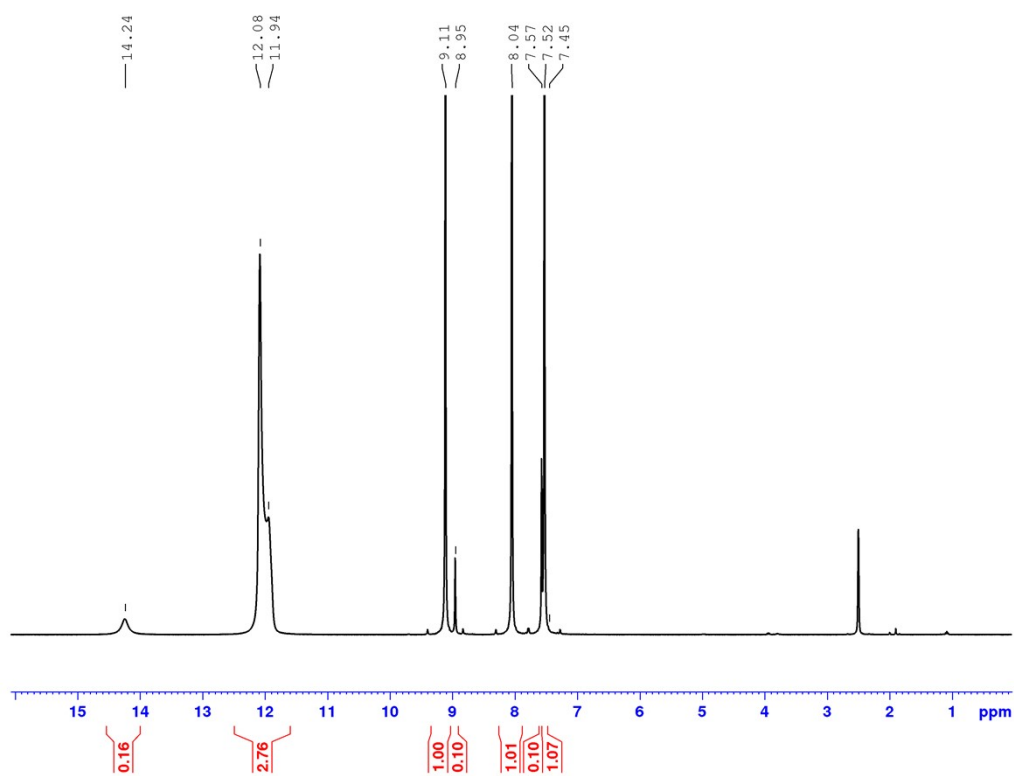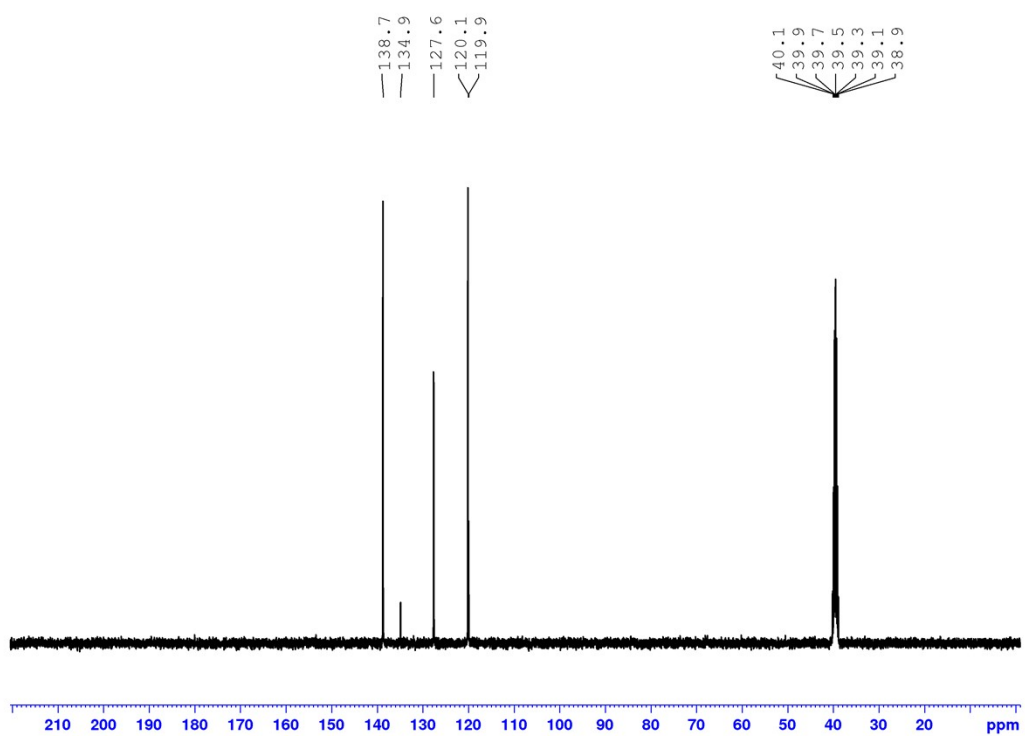

3

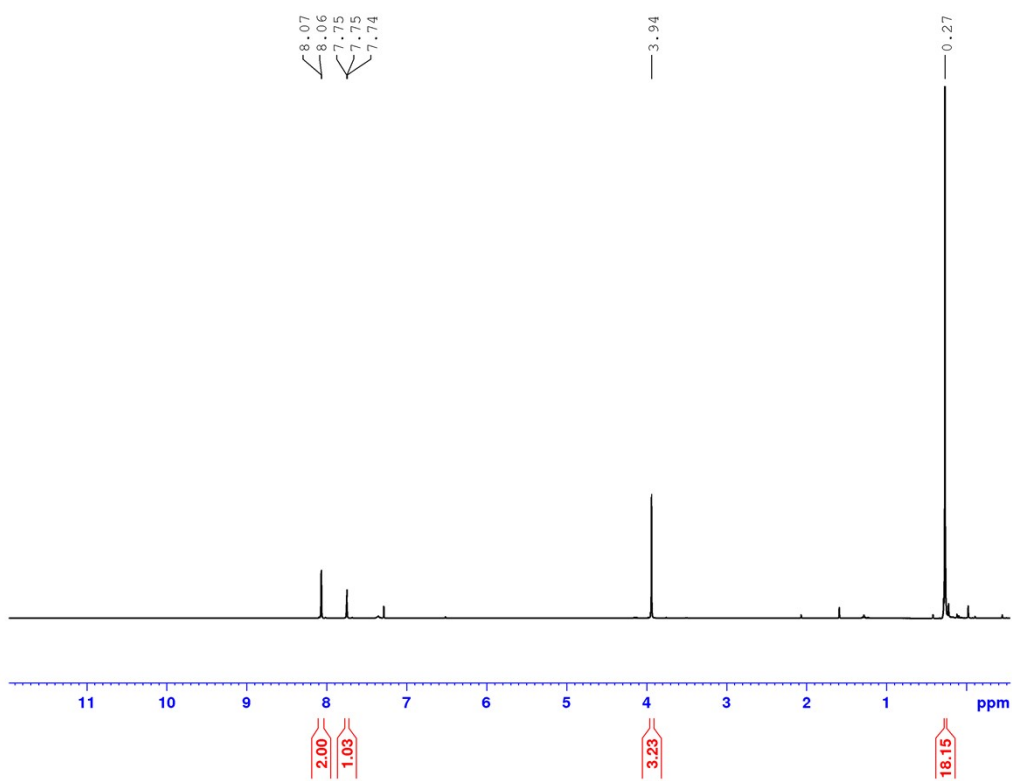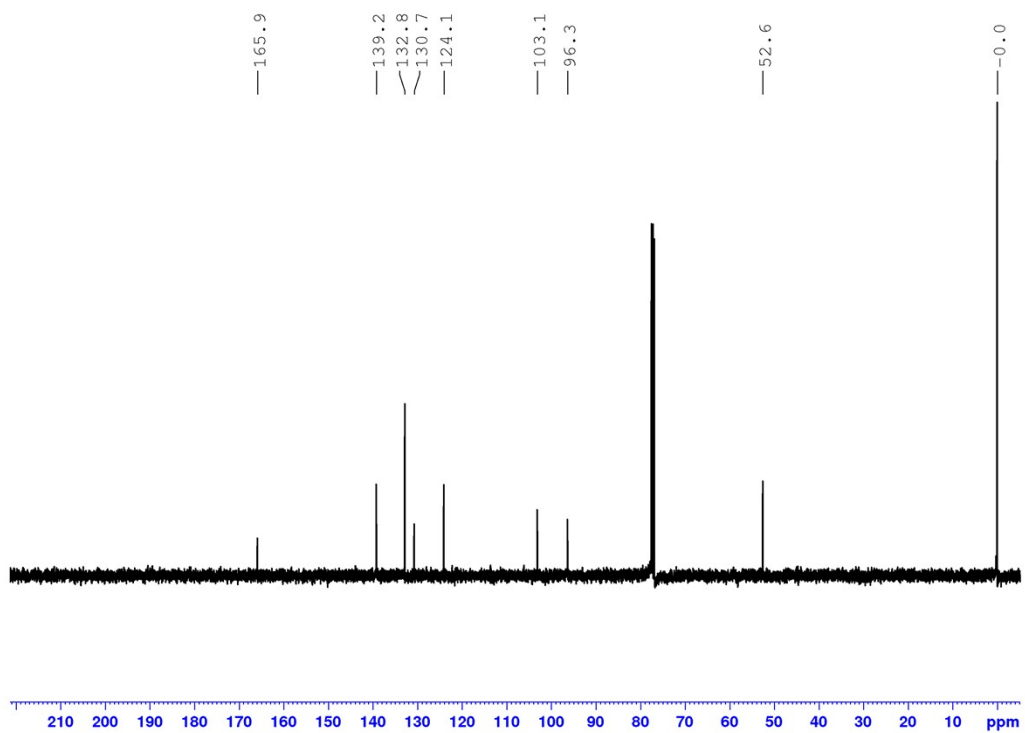

4

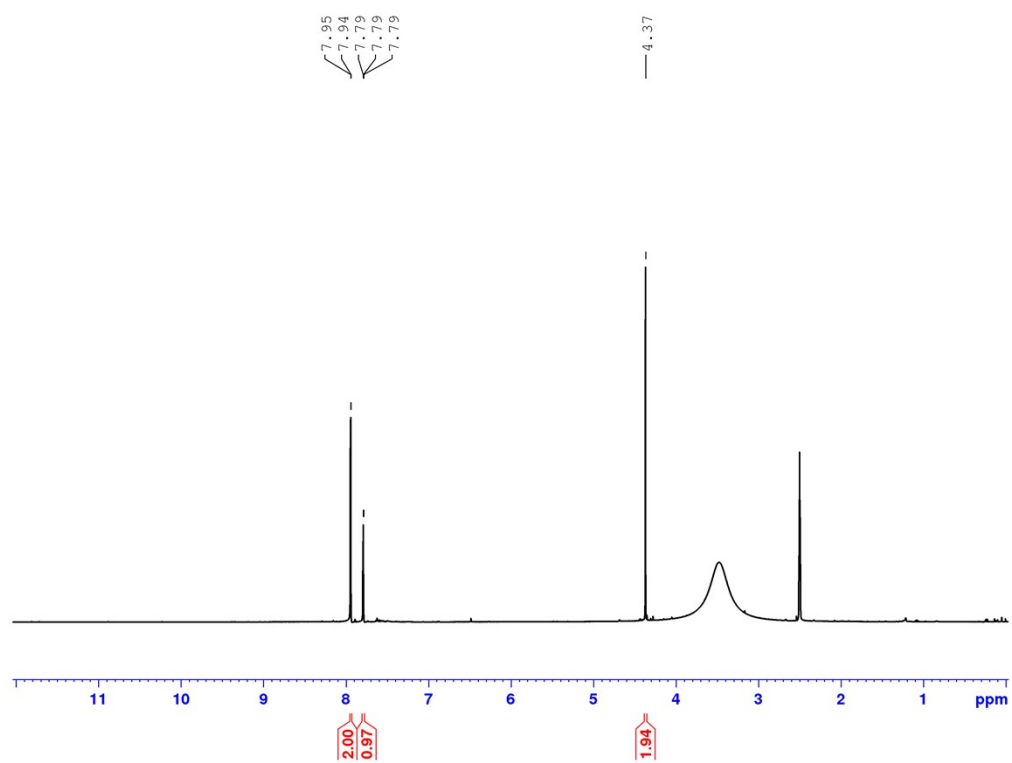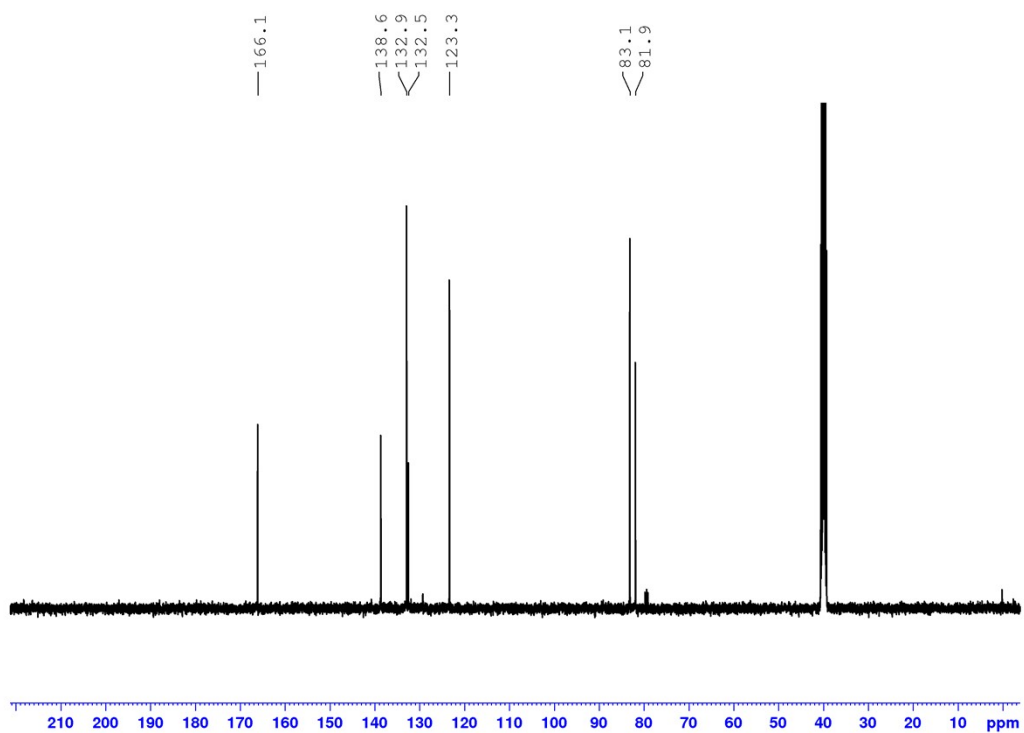

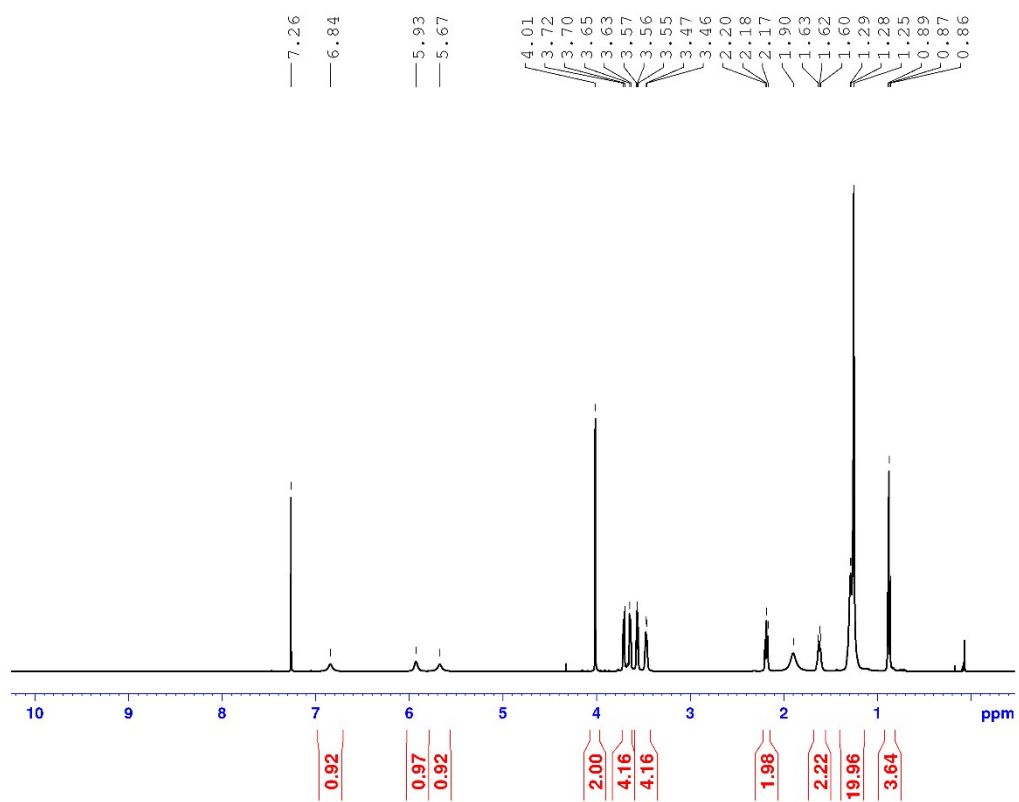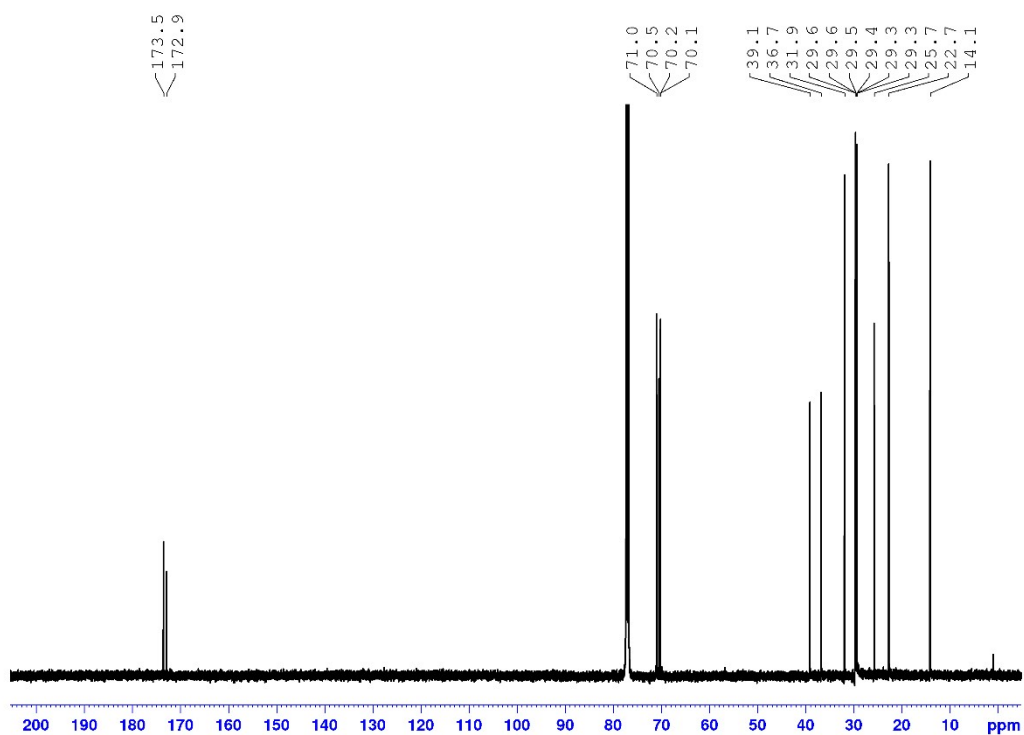

6

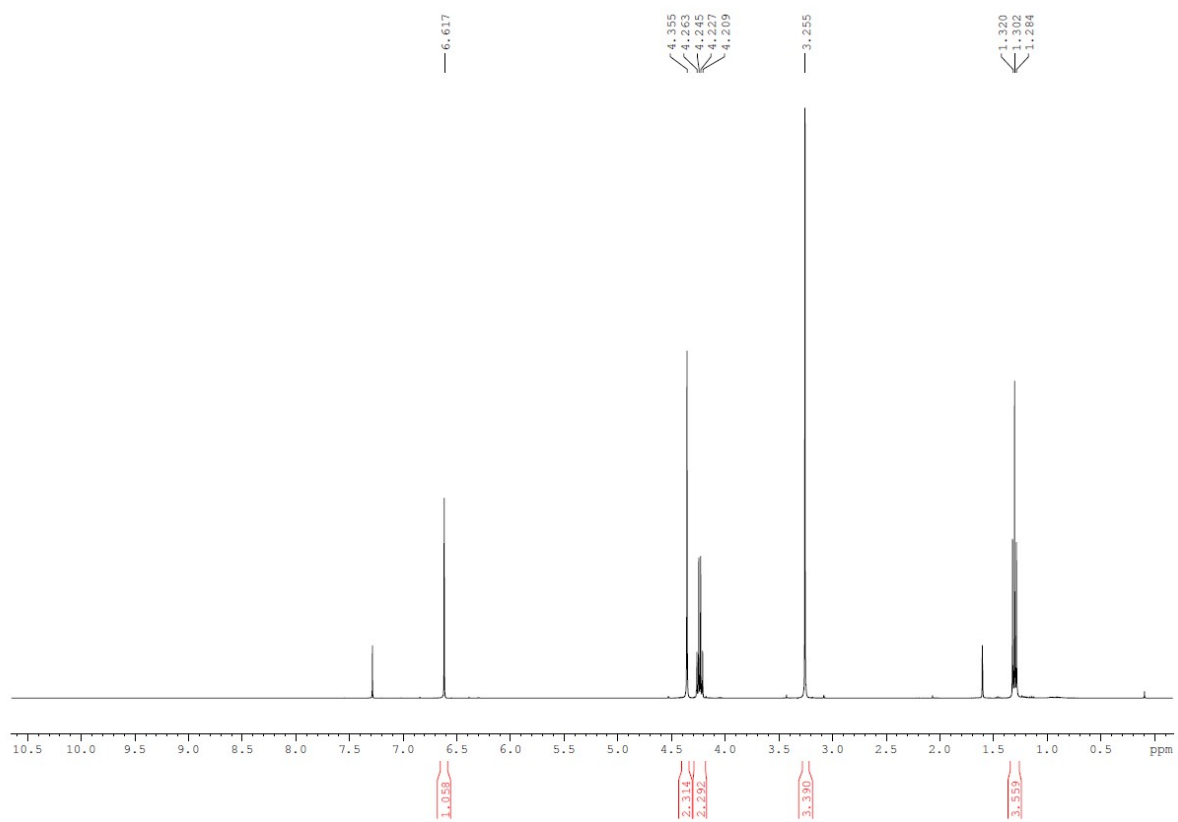

7

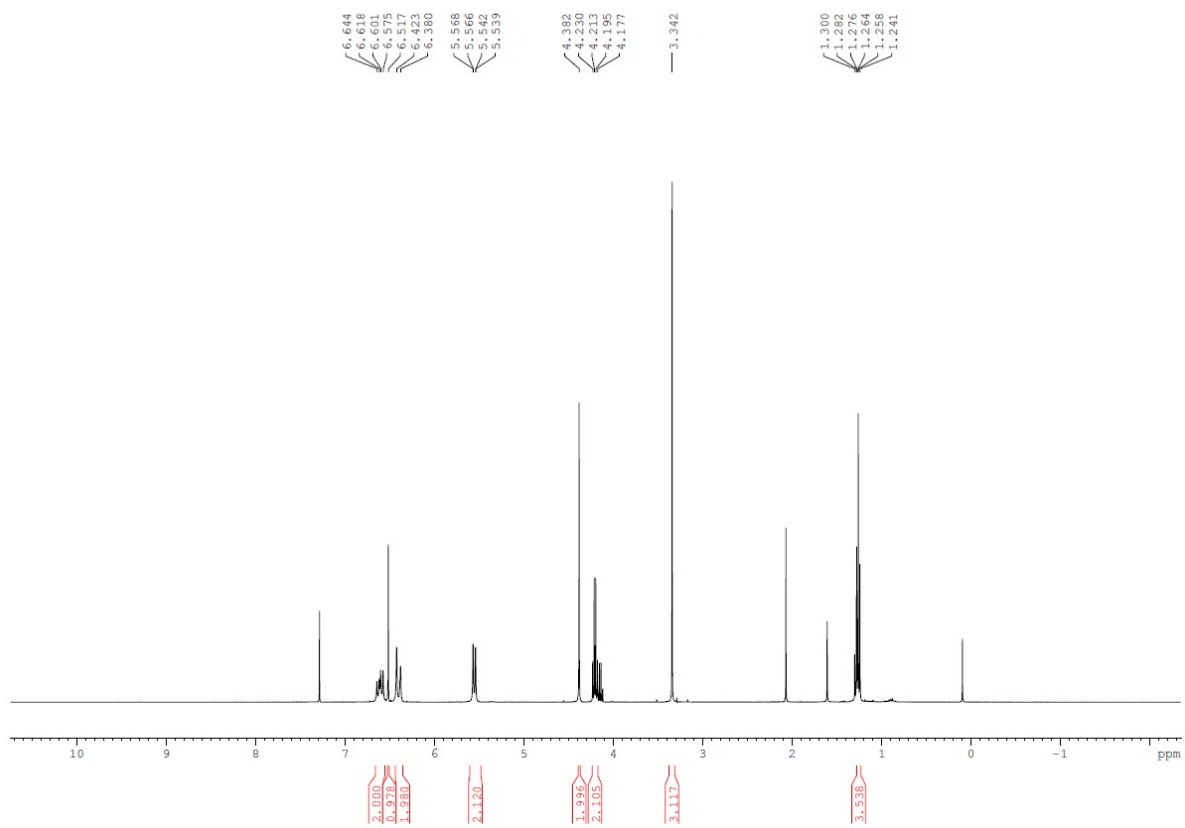

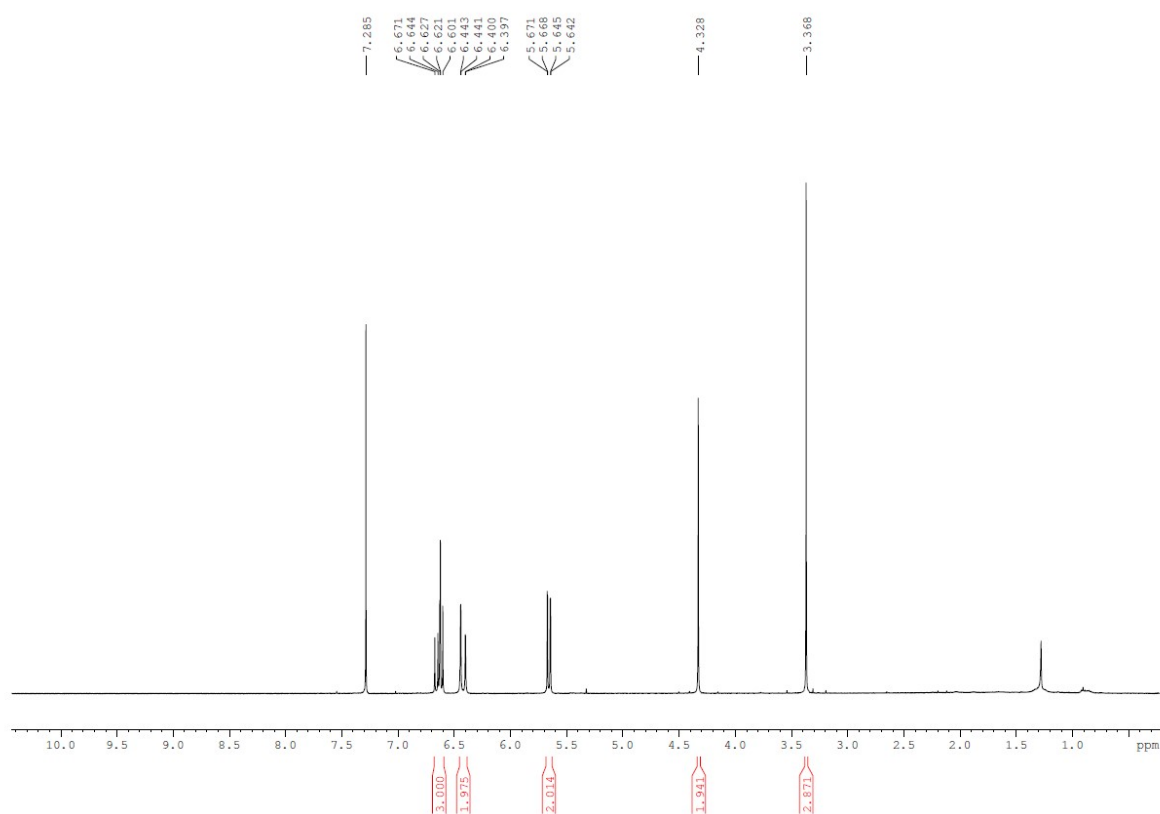

### 1.2.1.2 Peptides

#### General method 1: Manual solid-phase peptide synthesis (SPPS)

Manual peptide synthesis was performed on Merck LL MBHA Rink amide resin (0.33 mmol/g). Couplings were carried out by adding HATU (4 equiv) to a solution of the Fmoc-protected amino acid (4 equiv) in DMF (~0.4 M). After 10 seconds, DIPEA (8 equiv) was added to the mixture. This pre-activated mixture was then added to the resin in DMF and shaken for 3 min. The coupling time was extended in the case of coupling of Arg and unnatural amino acids (30 min). The side chain protecting groups used were: *t*Bu for Tyr; Boc for Lys, Trp; Pbf for Arg; Trt for Cys, homocysteine and His. Fmoc-Gly(Dmb)-OH was used for the synthesis of **P<sub>PL</sub>**. Fmoc-Lys(IvDde)-OH was used for the synthesis of Lys functionalised peptides **P8C9[PEG]** and **P8C9[FA]**.

Fmoc deprotection was carried out with 20% piperidine in DMF (3 x 3 min).

*N*-terminal acetyl capping was achieved with Ac<sub>2</sub>O (2 equiv) using DIPEA (4 equiv) in CH<sub>2</sub>Cl<sub>2</sub> for 1 hour at rt whilst shaking.



Completion of amide couplings and Fmoc deprotection was determined by a chloranil test, in which acetaldehyde (200  $\mu\text{L}$ ) and a saturated solution of chloranil in toluene (50  $\mu\text{L}$ ) were added to a small amount of resin swelled in  $\text{CH}_2\text{Cl}_2$ . After 10 seconds shaking at rt, no change in colour indicated complete coupling, whilst green colouration of the resin indicated presence of a free amine. Any incomplete couplings were submitted to a second round of coupling.

Side chain deprotection and cleavage from the resin was achieved with TFA containing 2.5% TIPS and 2.5%  $\text{H}_2\text{O}$  for 3 hours at rt or 1 hour at 42  $^\circ\text{C}$ . In case of cysteine-containing peptides, cleavage was achieved with TFA containing 5% EDT, 5%  $\text{H}_2\text{O}$  and 2.5% TIPS. After cleavage, the mixture was filtered through a sintered funnel, the beads washed with MeOH and the filtrate was concentrated under a stream of  $\text{N}_2$ . The crude residue was triturated with cold  $\text{Et}_2\text{O}$  before purification by preparative HPLC.

#### General method 2: Automated Fmoc solid-phase peptide synthesis (SPPS)

Automated peptide synthesis was carried out on a CEM Liberty Automated Microwave Peptide Synthesiser using Merck LL MBHA Rink Amide resin (0.46 mmol/g). All peptide couplings were performed with Fmoc-protected amino acids (5 equiv), Oxyma pure (10 equiv) and DIC (5 equiv) in DMF. Arg was coupled using double couplings for 15 min each without microwave irradiation. All other amino acids were coupled with 25 W power at 75  $^\circ\text{C}$  for 15 min.

Fmoc deprotection was achieved with a solution of 20% piperidine in DMF, using 45 W power at 75  $^\circ\text{C}$  for 3 min. *N*-terminal capping, cleavage and HPLC purification of peptides were carried out as previously described for manual SPPS (general method 1).

#### General method 3: Cyclisation *via* formation of a Trp-hCys cross bridge<sup>7</sup>

To a solution of a homocysteine and tryptophan-containing linear peptide (1 equiv) in  $\text{H}_2\text{O}$ -MeCN (0.5 mM) was added dropwise a solution of  $\text{I}_2$  (3 equiv) dissolved in the minimum amount of MeCN and the resulting solution stirred at room temperature for 4 – 24 h. The reaction was then concentrated under a stream of  $\text{N}_2$  and the crude reaction mixture dissolved in DMSO before being purified by preparative HPLC to yield the pure peptide.

#### **P<sub>4</sub>**: Cyclisation *via* a copper-catalysed azido-alkyne click reaction<sup>8</sup>

A solution of diazido peptide **P<sub>4L</sub>** (10.0 mg, 6.03  $\mu\text{mol}$ , 1 equiv) and dialkynyl linker 3,5-diethynylbenzoic acid (1.0 mg, 6.03  $\mu\text{mol}$ , 1 equiv) in 1:1  $^t\text{BuOH}/\text{H}_2\text{O}$  (12.5 mL, 0.8 mL/mg peptide) was degassed with  $\text{N}_2$  for 15 min, followed by the addition of  $\text{CuSO}_4 \cdot 5 \text{H}_2\text{O}$  (1.5 mg, 6.03  $\mu\text{mol}$ , 1 equiv), THPTA (3.2 mg, 6.03  $\mu\text{mol}$ , 1 equiv) and sodium ascorbate (3.6 mg, 18.09  $\mu\text{mol}$ , 3 equiv). The reaction

was stirred under N<sub>2</sub> and monitored by LCMS. When no starting material was detected, the reaction mixture was diluted with H<sub>2</sub>O and lyophilized prior to purification by preparative HPLC (5-60 % B, 20 min). The absence of azido peak in IR (~ 2100 cm<sup>-1</sup>) was checked for the purified, dried peptide (0.3 mg, 0.14 μmol, 2%).

**P5C4: Cyclisation using DCA**<sup>9</sup>

To a solution of **P5** (4.68 mg, 4 μmol, 1 equiv) in sodium phosphate buffer (1 mL, pH = 8.0, 50mM) was added TCEP-HCl (1.72 mg, 6 μmol, 1.5 equiv) and the solution stirred for 1 h. Subsequently, a solution of dichloroacetone (1.5 mg, 12 μmol, 3 equiv) in DMF (2 mL) was added and the solution shaken for 4 h. The solvent was removed under a stream of N<sub>2</sub> and the crude reaction mixture dissolved in DMSO before being purified by preparative HPLC (5-55 % B, 20 min) to yield the pure peptide (0.41 mg, 0.31 μmol, 8%).

**P5C6: Cyclisation via the formation of a methylene bridge**<sup>10</sup>

To a solution of **P5** (10.8 mg, 8.56 μmol, 1 equiv) in H<sub>2</sub>O (0.72 mL) was added a solution of TCEP-HCl (3.68 mg, 12.85 μmol, 1.5 equiv) and K<sub>2</sub>CO<sub>3</sub> (3.57 mg, 25.70 μmol, 3 equiv) in H<sub>2</sub>O (1.33 mL). The reaction was monitored by LCMS. Upon completion of this step, a solution of NEt<sub>3</sub> (6.00 μL, 42.8 μmol, 5 equiv) in THF (0.12 mL) and diiodomethane (9.21 mg, 34.24 μmol, 4 equiv) in THF (0.12 mL) were added sequentially. The reaction mixture was stirred at rt for 9 h. Solvent was removed under N<sub>2</sub> and the crude reaction mixture dissolved in DMSO prior to purification by preparative HPLC (5-60 % B, 20 min) to obtain the pure peptide (2.04 mg, 1.61 μmol, 19%).

**P5C7: Cyclisation using a divinylpyrimidine**<sup>11,12</sup>

To a solution of **P5** (16.4 mg, 13 μmol, 1 equiv) in sodium phosphate buffer (2 mL, pH = 8.0, 50mM) and DMF (6.2 mL) was added **8** (*N*-(4,6-divinylpyrimidin-2-yl)-*N*-methylglycine, 3.1 mg, 14 μmol, 1.1 equiv) and the reaction stirred at room temperature overnight. Solvent was removed under N<sub>2</sub> and the crude reaction mixture dissolved in DMSO prior to purification by preparative HPLC (10-70 % B, 20 min) to obtain the pure peptide (3.30 mg, 2.23 μmol, 17%).

**P6C2: Cyclisation via a copper-catalysed azido-alkyne click reaction**<sup>8,13</sup>

A solution of azido-alkynyl peptide **P6** (31.0 mg, 41 μmol, 1 equiv) in H<sub>2</sub>O (31 mL, 1 mL/mg peptide) was degassed with N<sub>2</sub> for 15 min, followed by the addition of CuSO<sub>4</sub>·5 H<sub>2</sub>O (10.2 mg, 41 μmol, 1 equiv), sodium ascorbate (8.1 mg, 41 μmol, 1 equiv) and DIPEA (57.1 μL, 328 μmol, 8 equiv). The reaction was stirred under N<sub>2</sub> and monitored by LCMS. When no starting material was detected, the reaction mixture was diluted with H<sub>2</sub>O and lyophilized prior to purification by preparative HPLC (20-55 % B, 20

min). The absence of azido peak in IR ( $\sim 2100\text{ cm}^{-1}$ ) was checked for the purified, dried peptide (7.6 mg, 6  $\mu\text{mol}$ , 19%).

**P6C3: Cyclisation *via* a ruthenium-catalysed azido-alkyne click reaction**<sup>14</sup>

A solution of azido-alkynyl peptide **P6** (11.8 mg, 9  $\mu\text{mol}$ , 1 equiv) in 1:1 <sup>t</sup>BuOH/H<sub>2</sub>O (14.8 mL, 0.8 mL/mg peptide) was degassed with N<sub>2</sub> for 15 min, followed by the addition of chloro(pentamethylcyclopentadienyl)ruthenium (II) tetramer (3.06 mg, 3  $\mu\text{mol}$ , 30 mol%). The reaction was stirred under N<sub>2</sub> overnight. Solvent was removed under a stream of N<sub>2</sub> and the crude reaction mixture dissolved in DMSO before being purified by preparative HPLC (20-40 % B, 20 min) to yield the pure peptide (0.30 mg, 0.24  $\mu\text{mol}$ , 3%).

**P7C8: Cyclisation *via* formation of a Trp-Cys cross bridge**<sup>7</sup>

To a solution of **P7** (43.0 mg, 32  $\mu\text{mol}$ , 1 equiv) in H<sub>2</sub>O-MeCN (1:1, 64 mL) was added dropwise a solution of I<sub>2</sub> (16.2 mg, 64  $\mu\text{mol}$ , 2 equiv) in MeCN (5 mL) and the resulting solution stirred at room temperature for 6 h. The reaction was then washed with CH<sub>2</sub>Cl<sub>2</sub> (2 x 30 mL) and the solvent removed under a stream of N<sub>2</sub>. The crude reaction mixture was dissolved in DMSO before being purified by preparative HPLC (20-70 % B, 20 min) to yield the pure peptide (10.6 mg, 7.9  $\mu\text{mol}$ , 25%).

### 1.2.1.2.1 LCMS and purity of peptides

**Table S2** Sequence, mass, purity and retention time of CK2 peptides from LCMS and HPLC analysis.

| Peptide               | Sequence                                                            | Mass   | <i>m/z</i><br>found | <i>m/z</i><br>calc. | Species           | Purity<br>(%) | Rt*<br>(min) |
|-----------------------|---------------------------------------------------------------------|--------|---------------------|---------------------|-------------------|---------------|--------------|
| P1                    | RLYGFK                                                              | 823.5  | 824.7               | 824.5               | M+H               | 95            | 6.84         |
| P2                    | LYGFKW                                                              | 853.5  | 854.5               | 854.5               | M+H               | 97            | 8.75         |
| P3                    | RLYGFKW                                                             | 1009.6 | 1011.0              | 1010.6              | M+H               | 93            | 7.92         |
| P4                    | RLYGFKWH                                                            | 1146.6 | 1164.7              | 1164.6              | M+NH <sub>4</sub> | 96            | 7.08         |
| P <sub>+L</sub>       | GXRLYGFKWHXGG                                                       | 1541.2 | 1544.2              | 1542.8              | M+H               | 97            | 8.20         |
| P <sub>+</sub>        | GX <sub>C1</sub> RLYGFKWHX <sub>C1</sub> GG                         | 1711.8 | 1711.6              | 1710.8              | M-H               | 80            | 8.08         |
| P5                    | CRLYGFKC                                                            | 1029.5 | 1030.8              | 1030.5              | M+H               | 96            | 7.42         |
| P6                    | JRLYGFKX                                                            | 1030.6 | 1032.6              | 1031.6              | M+H               | 96            | 7.41         |
| P7                    | CRLYGFKW                                                            | 1112.5 | 1114.0              | 1113.5              | M+H               | 95            | 7.81         |
| P8                    | (hC)RLYGFKW                                                         | 1126.6 | 1128.1              | 1127.6              | M+H               | 95            | 8.15         |
| P6C2                  | J <sub>C2</sub> RLYGFKX <sub>C2</sub>                               | 1030.6 | 1032.0              | 1031.6              | M+H               | 98            | 6.82         |
| P6C3                  | J <sub>C3</sub> RLYGFKX <sub>C3</sub>                               | 1030.6 | 1091.8              | 1091.6              | M+PrOH+H          | 96            | 8.02         |
| P5C4                  | C <sub>C4</sub> RLYGFKC <sub>C4</sub>                               | 1083.5 | 1147.6              | 1147.5              | M+MeCN+Na         | 90            | 7.21         |
| P5C5                  | C <sub>C5</sub> RLYGFKC <sub>C5</sub>                               | 1131.5 | 1132.9              | 1132.5              | M+H               | 95            | 8.29         |
| P5C6                  | C <sub>C6</sub> RLYGFKC <sub>C6</sub>                               | 1041.5 | 1043.6              | 1042.5              | M+H               | 92            | 7.05         |
| P5C7                  | C <sub>C7</sub> RLYGFKC <sub>C7</sub>                               | 1248.6 | 1250.3              | 1249.6              | M+H               | 74            | 7.40         |
| P7C8                  | C <sub>C8</sub> RLYGFKW <sub>C8</sub>                               | 1110.5 | 1112.6              | 1111.5              | M+H               | 94            | 7.98         |
| P8C9                  | (hC) <sub>C9</sub> RLYGFKW <sub>C9</sub>                            | 1124.6 | 1126.5              | 1125.6              | M+H               | 97            | 7.76         |
| P.                    | HWKFGYLR                                                            | 1146.6 | 1148.8              | 1147.6              | M+H               | 80            | 7.36         |
| FA-P8                 | (LA)(PEG)(hC)RLYGFKW                                                | 1411.8 | 1411.1              | 1410.8              | M-H               | 90            | 10.93        |
| FA-P8C9               | (LA)(PEG)(hC) <sub>C9</sub> RLYGFKW <sub>C9</sub>                   | 1409.8 | 1411.7              | 1410.8              | M+H               | 99            | 10.56        |
| PEG-P8                | (PEG)(hC)RLYGFKW                                                    | 1271.7 | 1274.1              | 1272.7              | M+H               | 86            | 7.93         |
| PEG-P8C9              | (PEG)(hC) <sub>C3</sub> RLYGFKW <sub>C3</sub>                       | 1269.6 | 1271.1              | 1270.6              | M+H               | 98            | 7.52         |
| P8[FA]                | (hC)RLYGFK(PEG-(LA))W                                               | 1453.8 | 1455.6              | 1454.8              | M+H               | 98            | 11.73        |
| P8C9[FA]              | (hC) <sub>C9</sub> RLYGFK(PEG-(LA))W <sub>C9</sub>                  | 1451.8 | 1453.6              | 1452.8              | M+H               | 92            | 11.37        |
| P8[PEG]               | (hC)RLYGFK(PEG-Ac)W                                                 | 1313.7 | 1314.9              | 1314.7              | M+H               | 97            | 8.47         |
| P8C9[PEG]             | (hC) <sub>C3</sub> RLYGFK(PEG-Ac)W <sub>C3</sub>                    | 1311.6 | 1313.4              | 1312.7              | M+H               | >99           | 7.61         |
| FA-PEG <sup>1</sup>   | (LA)(PEG)                                                           | 344.3  | 345.2               | 345.3               | M+H               | N/A           | N/A          |
| TAT-P8 <sup>2</sup>   | GRKKRRQRRRPPQ(Ahx)(Ahx)<br>(hC)RLYGFKW                              | 3010.8 | 753.7               | 753.7               | M+4H              | 62            | 5.95         |
| TAT-P8C9 <sup>2</sup> | GRKKRRQRRRPPQ(Ahx)(Ahx)<br>(hC) <sub>C9</sub> RLYGFKW <sub>C9</sub> | 3008.8 | 753.7               | 753.2               | M+4H              | >99           | 5.55         |
| TAT-                  | GRKKRRQRRRPPQ(Ahx)(Ahx)                                             | 1943.2 | 649.0               | 648.8               | M+3H              | 98            | 3.75         |

| <b>(Ahx)<sub>2</sub><sup>2</sup></b>    |                                                           |        |       |       |      |     |      |  |
|-----------------------------------------|-----------------------------------------------------------|--------|-------|-------|------|-----|------|--|
| <b>R3-P8<sup>2</sup></b>                | RRR(Ahx)(Ahx)(hC)RLYGFKW                                  | 1779.0 | 890.9 | 890.5 | M+2H | 98  | 6.31 |  |
| <b>R3-P8C9<sup>2</sup></b>              | RRR(Ahx)(Ahx)(hC) <sub>C9</sub> RLYGFK<br>W <sub>C9</sub> | 1777.0 | 890.0 | 889.5 | M+2H | 99  | 5.96 |  |
| <b>R3-(Ahx)<sub>2</sub><sup>2</sup></b> | RRR(Ahx)(Ahx)                                             | 711.5  | 710.5 | 710.5 | M-H  | >99 | 6.70 |  |

X = Aza-alanine. J = Propargylglycine. (hC) = Homocysteine. (LA) = Lauric acid. (PEG) = 2-(2-(2-aminoethoxy)ethoxy)acetic acid. (Ahx) = 6-aminohexanoic acid. All peptides feature an amide at the C-terminus and an acetyl capping at the N-terminus unless otherwise stated. <sup>1</sup>This compound is not visible by HPLC and thus no HPLC traces are reported. <sup>2</sup>Peptides feature a free amine at the N-terminus.

### 1.2.1.2.2 Yields of peptides

**Table S3** Sequence and yield of peptides.

| <b>Peptide</b>        | <b>Sequence</b>                                    | <b>Yield (%)</b> |
|-----------------------|----------------------------------------------------|------------------|
| <b>P1</b>             | RLYGFK                                             | 9.8              |
| <b>P2</b>             | LYGFKW                                             | 25.8             |
| <b>P3</b>             | RLYGFKW                                            | 8.4              |
| <b>P4</b>             | RLYGFKWH                                           | 4.7              |
| <b>P<sub>+L</sub></b> | GXRLYGFKWHXGG                                      | 2.5              |
| <b>P<sub>+</sub></b>  | GX <sub>C1</sub> RLYGFKWHX <sub>C1</sub> GG        | 2.3              |
| <b>P5</b>             | CRLYGFKC                                           | 0.8              |
| <b>P6</b>             | JRLYGFKX                                           | 5.0              |
| <b>P7</b>             | CRLYGFKW                                           | 23.9             |
| <b>P8</b>             | (hC)RLYGFKW                                        | 2.3              |
| <b>P6C2</b>           | J <sub>C2</sub> RLYGFKX <sub>C2</sub>              | 14.6             |
| <b>P6C3</b>           | J <sub>C3</sub> RLYGFKX <sub>C3</sub>              | 1.3              |
| <b>P5C4</b>           | C <sub>C4</sub> RLYGFKC <sub>C4</sub>              | 7.8              |
| <b>P5C5</b>           | C <sub>C5</sub> RLYGFKC <sub>C5</sub>              | 8.3              |
| <b>P5C6</b>           | C <sub>C6</sub> RLYGFKC <sub>C6</sub>              | 20.0             |
| <b>P5C7</b>           | C <sub>C7</sub> RLYGFKC <sub>C7</sub>              | 17.2             |
| <b>P7C8</b>           | C <sub>C8</sub> RLYGFKW <sub>C8</sub>              | 24.6             |
| <b>P8C9</b>           | (hC) <sub>C9</sub> RLYGFKW <sub>C9</sub>           | 28.4             |
| <b>P.</b>             | HWKFGYLR                                           | 21.7             |
| <b>FA-P8</b>          | (LA)(PEG)(hC)RLYGFKW                               | 18.1             |
| <b>FA-P8C9</b>        | (LA)(PEG)(hC) <sub>C9</sub> RLYGFKW <sub>C9</sub>  | 23.5             |
| <b>PEG-P8</b>         | (PEG)(hC)RLYGFKW                                   | 13.5             |
| <b>PEG-P8C9</b>       | (PEG)(hC) <sub>C3</sub> RLYGFKW <sub>C3</sub>      | 11.8             |
| <b>P8[FA]</b>         | (hC)RLYGFK(PEG-(LA))W                              | 9.8              |
| <b>P8C9[FA]</b>       | (hC) <sub>C9</sub> RLYGFK(PEG-(LA))W <sub>C9</sub> | 24.4             |
| <b>P8[PEG]</b>        | (hC)RLYGFK(PEG-Ac)W                                | 10.4             |
| <b>P8C9[PEG]</b>      | (hC) <sub>C3</sub> RLYGFK(PEG-Ac)W <sub>C3</sub>   | 34.1             |

|                                          |                                                                 |      |
|------------------------------------------|-----------------------------------------------------------------|------|
| <b>FA-PEG</b>                            | (LA)(PEG)                                                       | 89.4 |
| <b>TAT-P8<sup>2</sup></b>                | GRKKRRQRRRPPQ(Ahx)(Ahx)(hC)RLYGFKW                              | 3.9  |
| <b>TAT-P8C9<sup>2</sup></b>              | GRKKRRQRRRPPQ(Ahx)(Ahx)(hC) <sub>C9</sub> RLYGFKW <sub>C9</sub> | 37.8 |
| <b>TAT-(Ahx)<sub>2</sub><sup>2</sup></b> | GRKKRRQRRRPPQ(Ahx)(Ahx)                                         | 18.8 |
| <b>R3-P8<sup>2</sup></b>                 | RRR(Ahx)(Ahx)(hC)RLYGFKW                                        | 1.4  |
| <b>R3-P8C9<sup>2</sup></b>               | RRR(Ahx)(Ahx)(hC) <sub>C9</sub> RLYGFKW <sub>C9</sub>           | 37.8 |
| <b>R3-(Ahx)<sub>2</sub><sup>2</sup></b>  | RRR(Ahx)(Ahx)                                                   | 24.4 |

X = Aza-alanine. J = Propargylglycine. (hC) = Homocysteine. (LA) = Lauric acid. (PEG) = 2-(2-(2-aminoethoxy)ethoxy)acetic acid. (Ahx) = 6-aminohexanoic acid. All peptides feature an amide at the C-terminus and an acetyl capping at the N-terminus unless otherwise stated. <sup>2</sup>Peptides feature a free amine at the N-terminus.

### 1.2.1.2.3 HPLC traces of peptides

#### P1

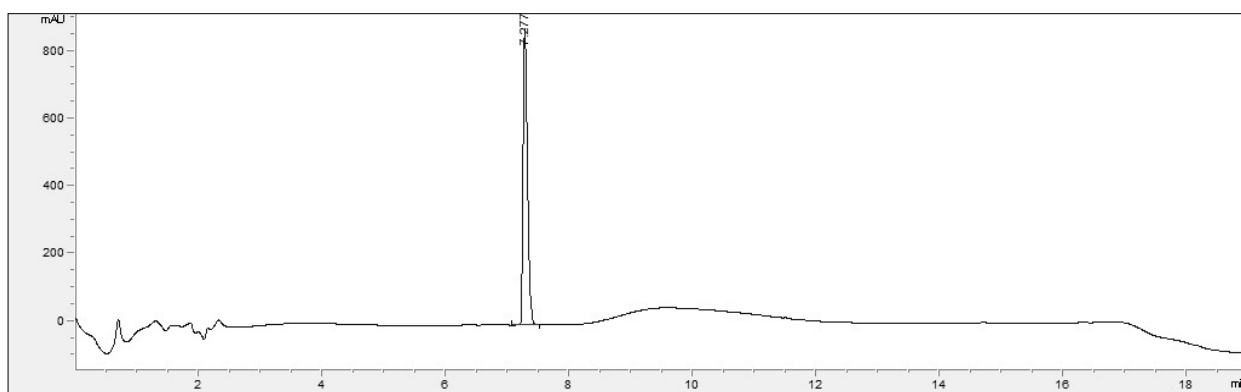

10-60% B, 15 min

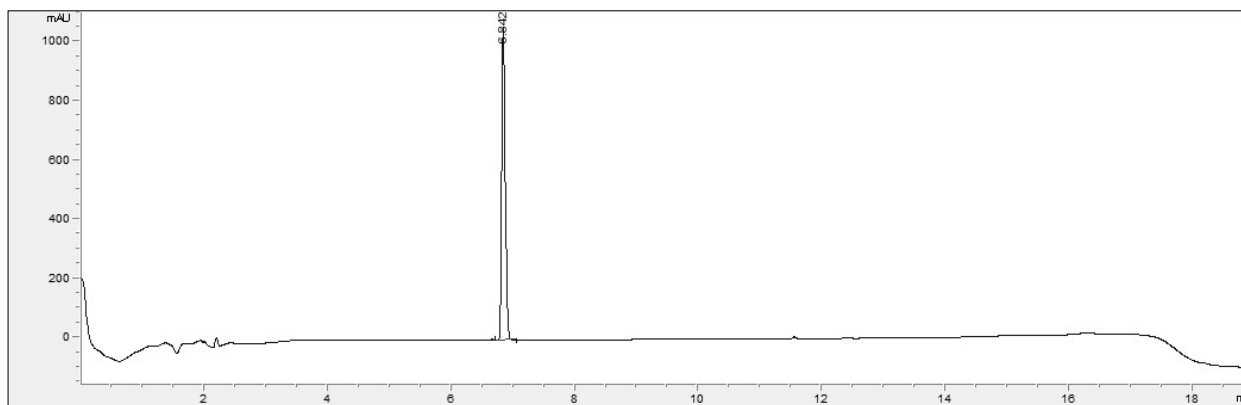

5-95% B, 15 min

#### P2

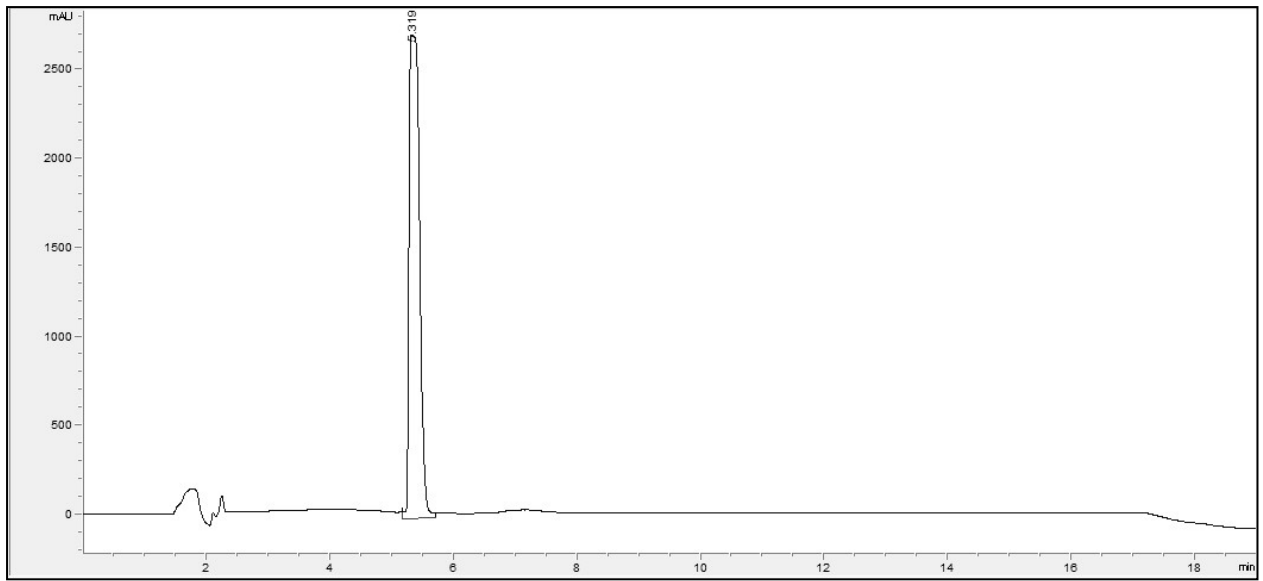

30-60% B, 15 min

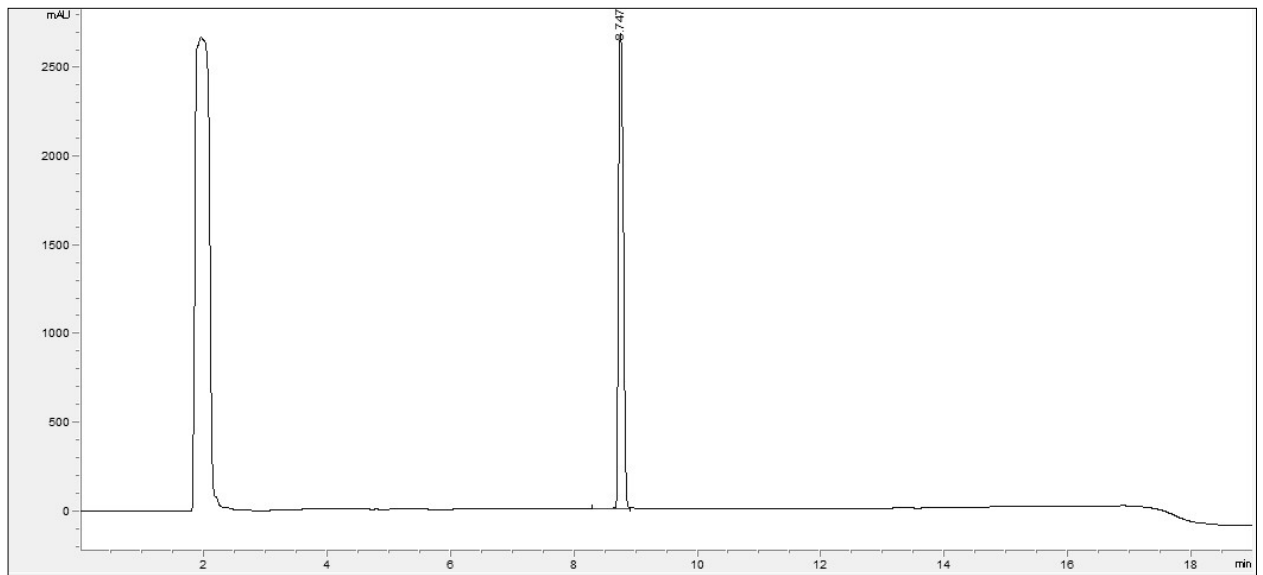

5-95% B, 15 min

**P3**

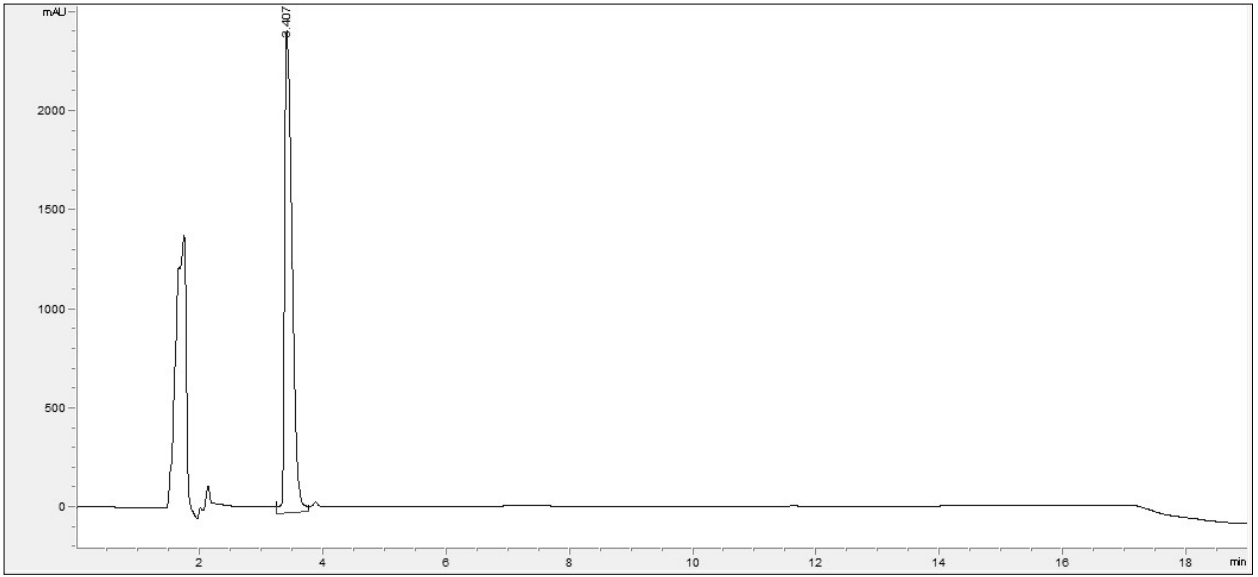

30-60% B, 15 min

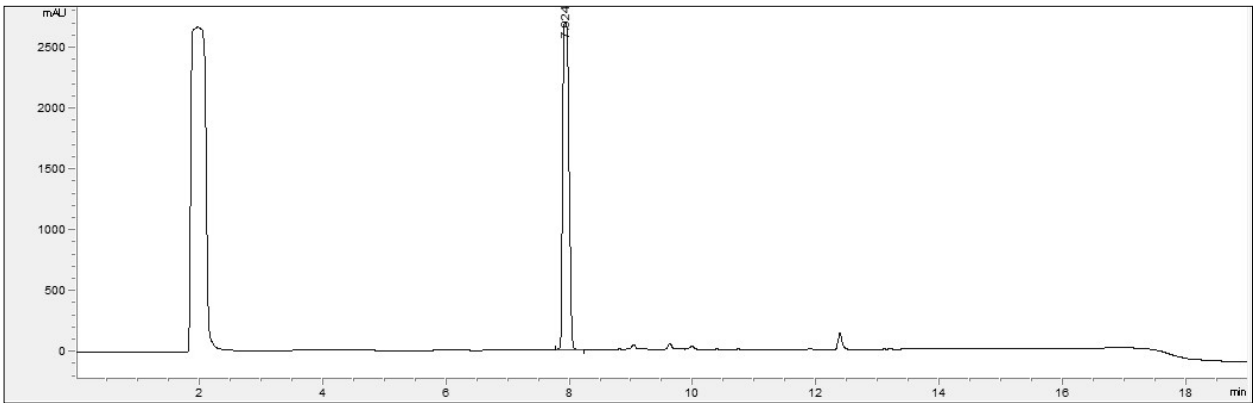

5-95% B, 15 min

**P4**

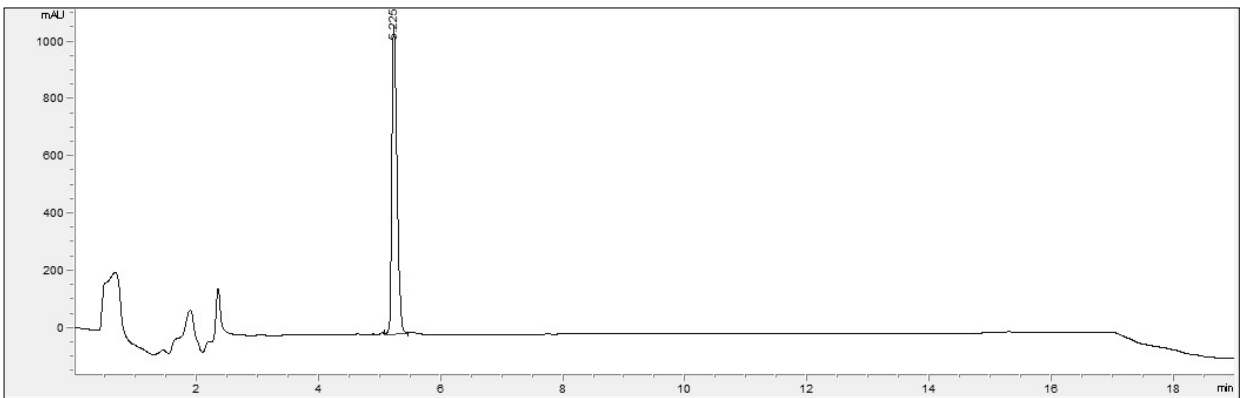

20-60% B, 15 min



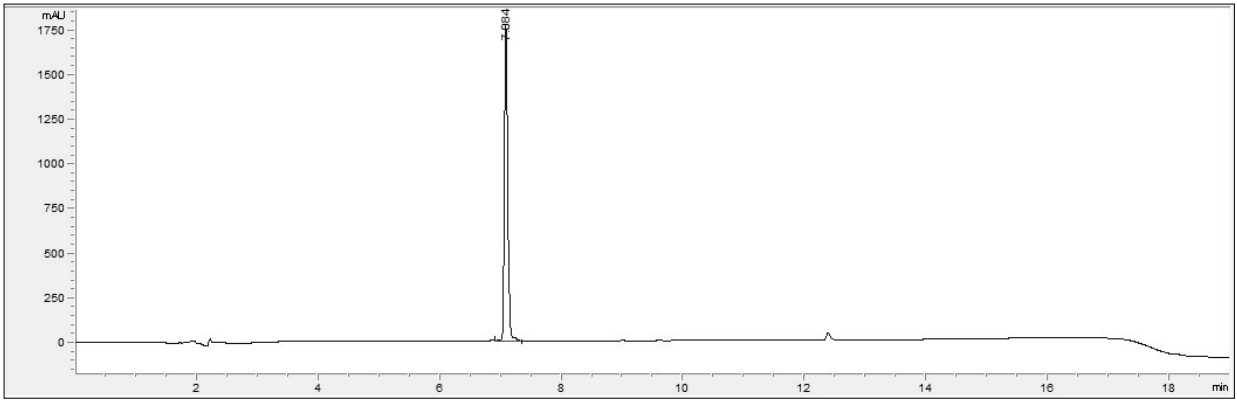

5-95% B, 15 min

**P5**

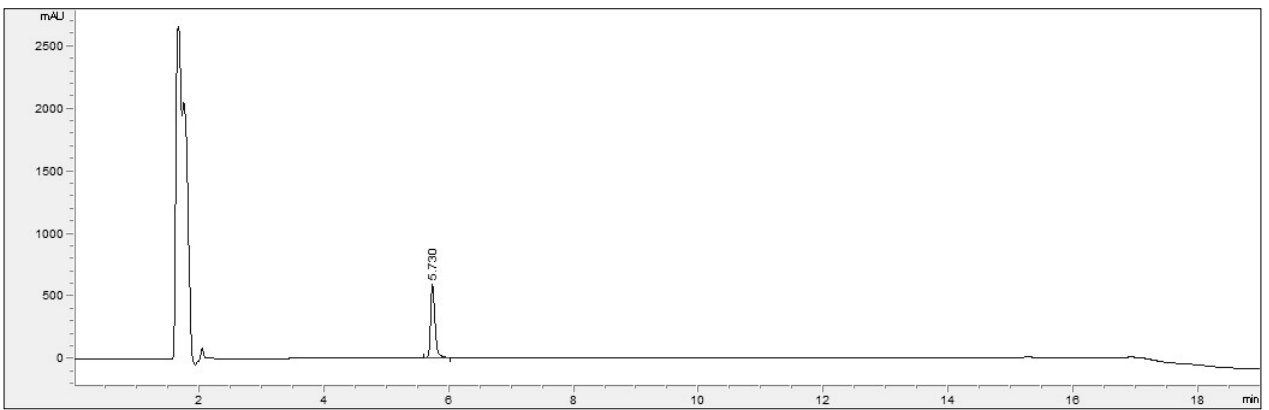

20-60% B, 15 min

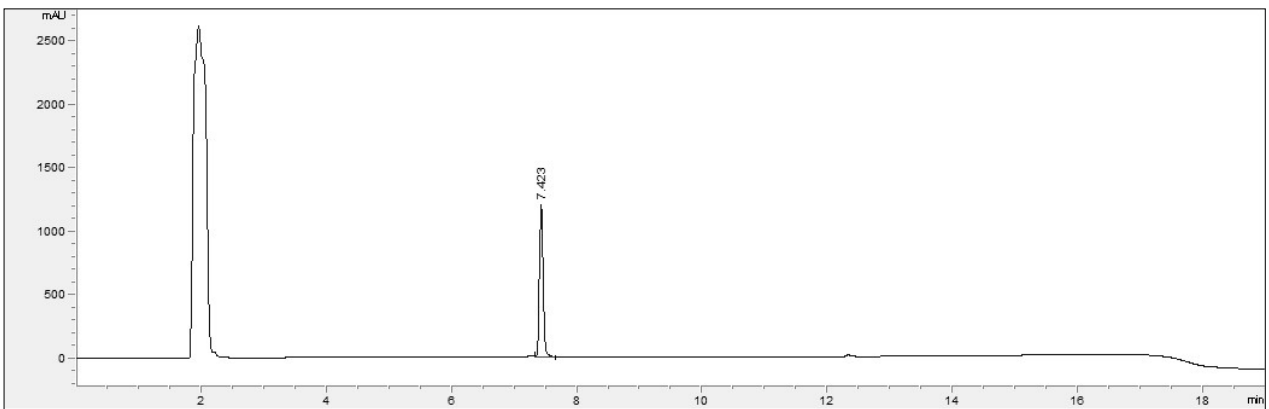

5-95% B, 15 min

**P6**

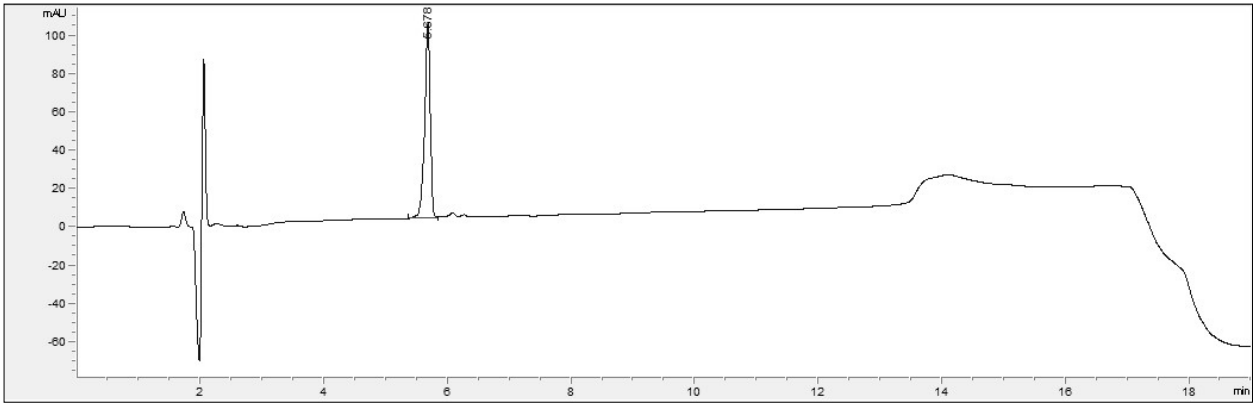

20-60% B, 15 min

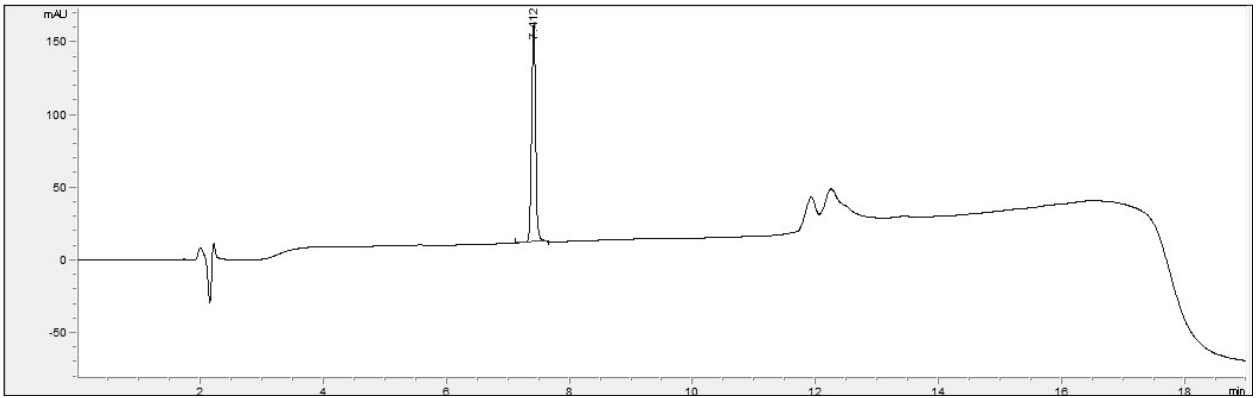

5-95% B, 15 min

**P7**

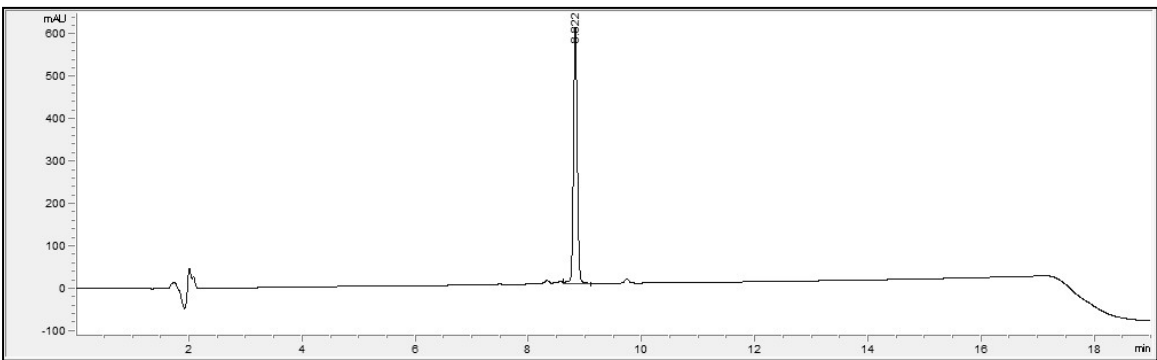

30-80% B, 15 min

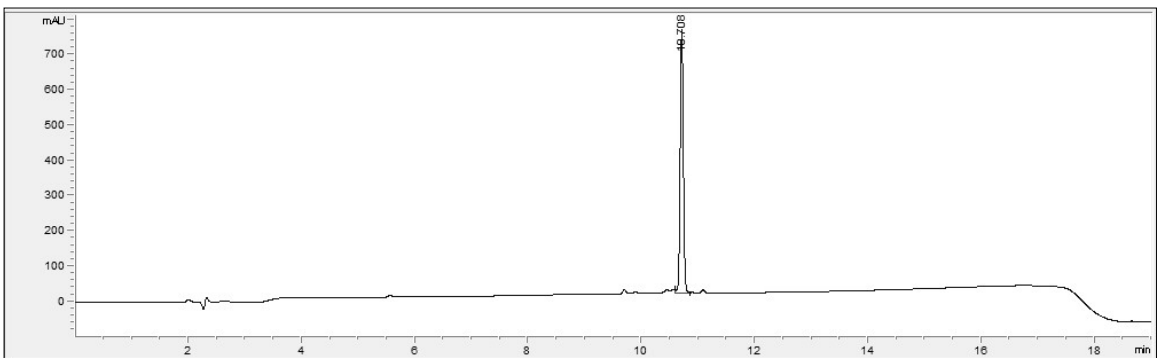

5-95% B, 15 min

**P8**

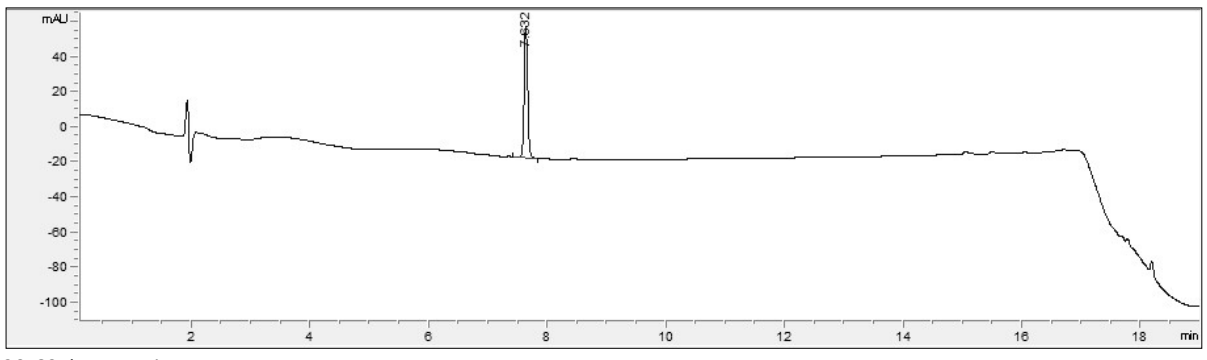

20-60% B, 15 min

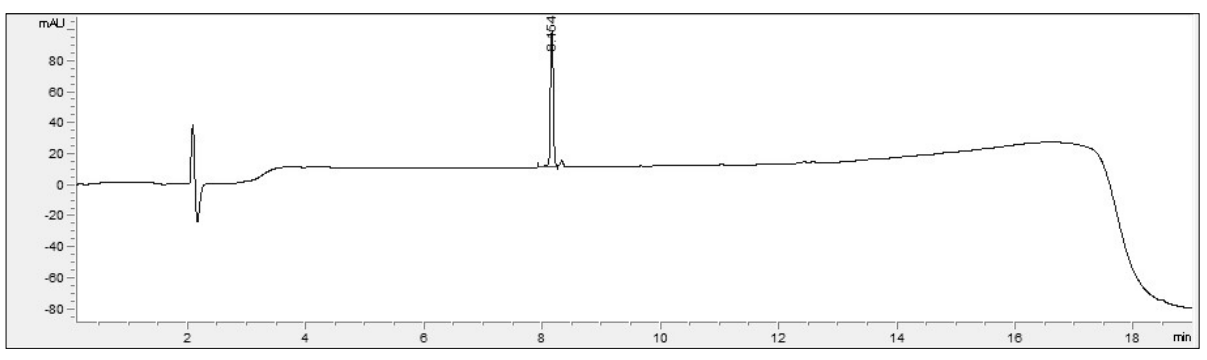

5-95% B, 15 min

**P.**

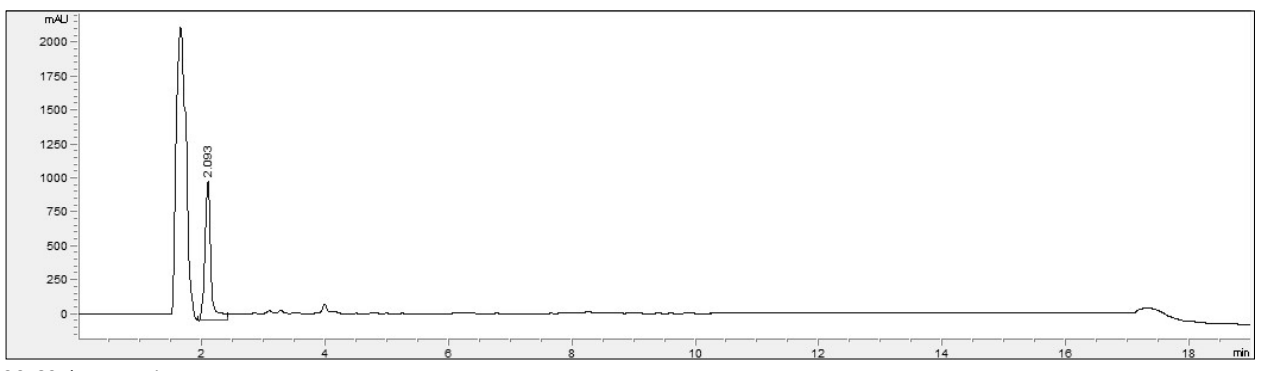

30-60% B, 15 min

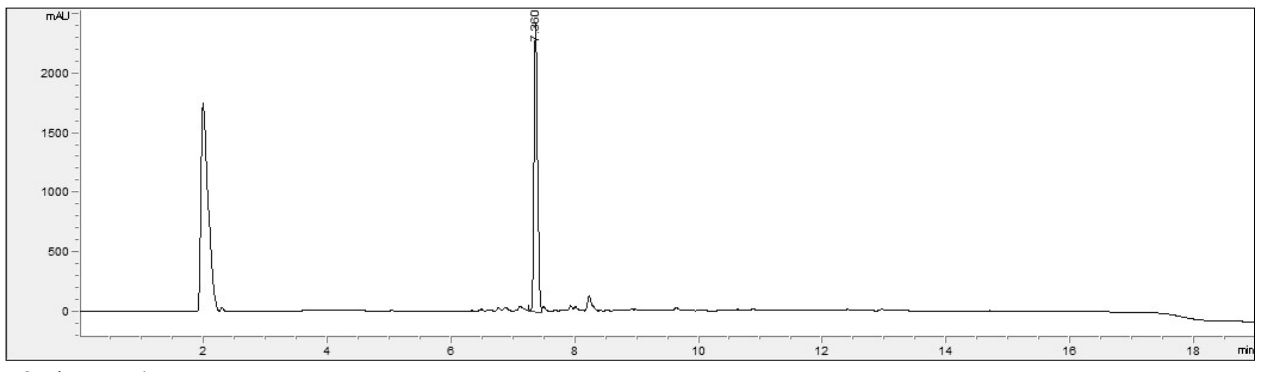

5-95% B, 15 min

**P+L**

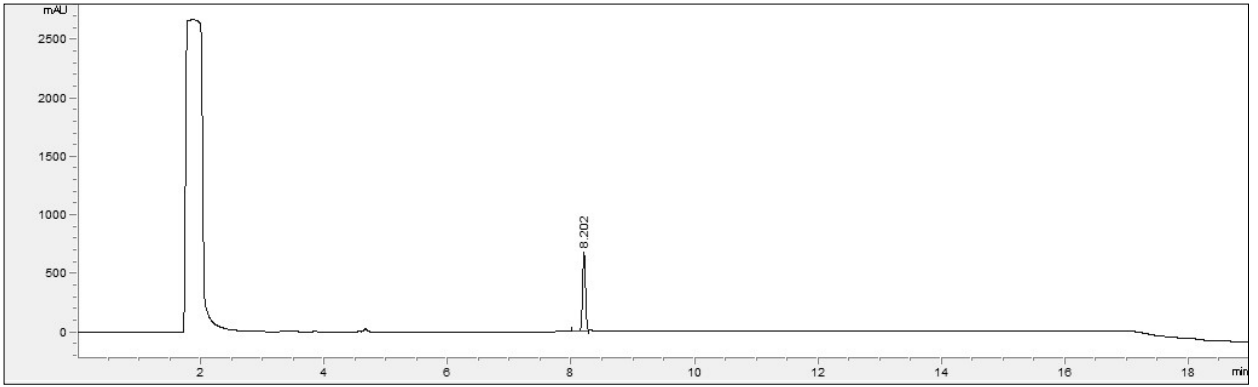

10-60% B, 15 min

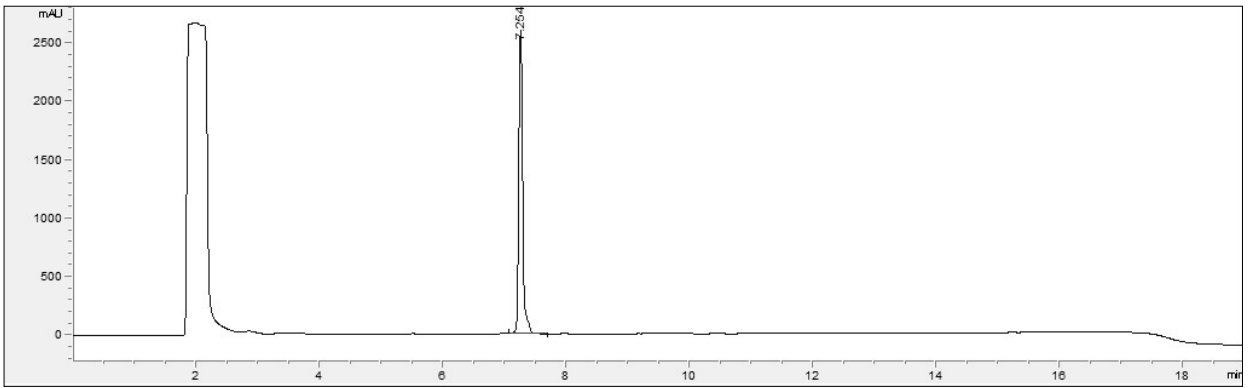

5-95% B, 15 min

**P<sub>+</sub>**

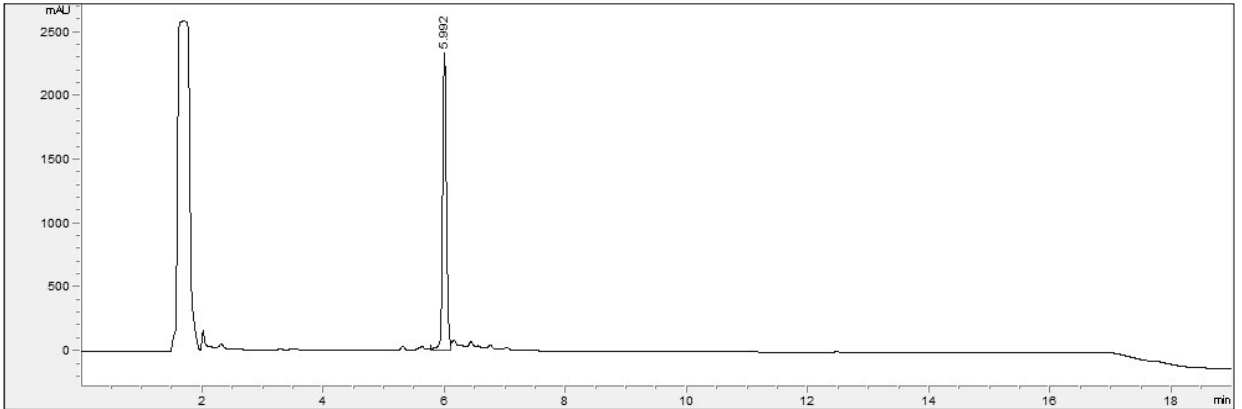

20-60% B, 15 min

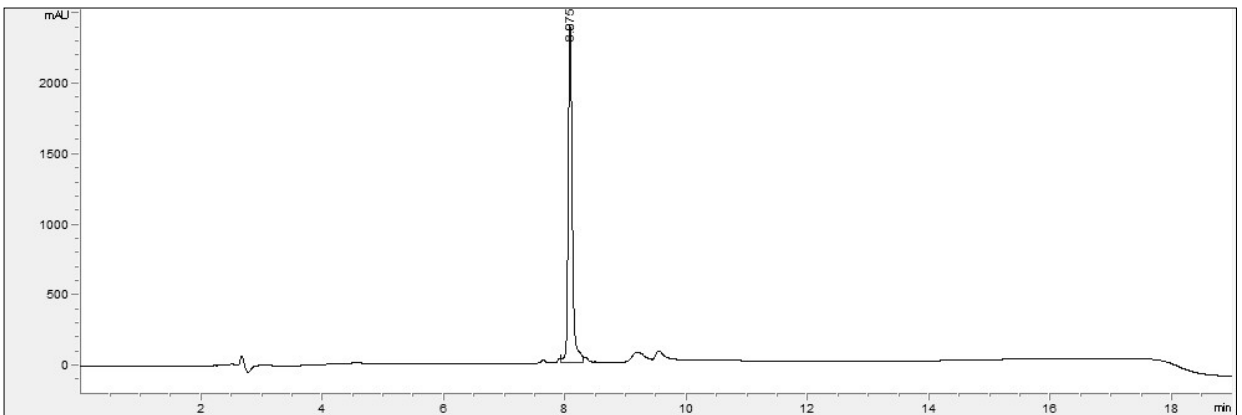

5-95% B, 15 min

**P5C4**

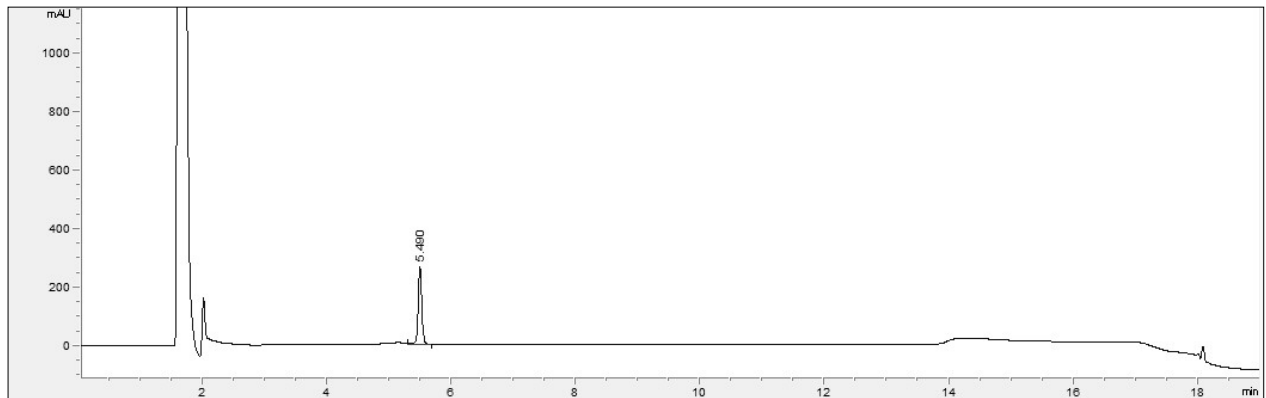

20-60% B, 15 min

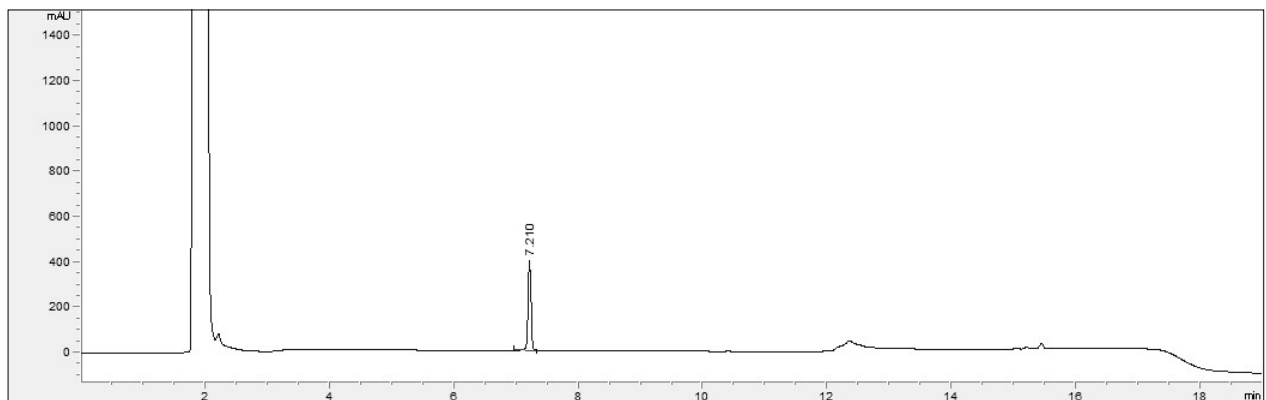

5-95% B, 15 min

**P5C5**

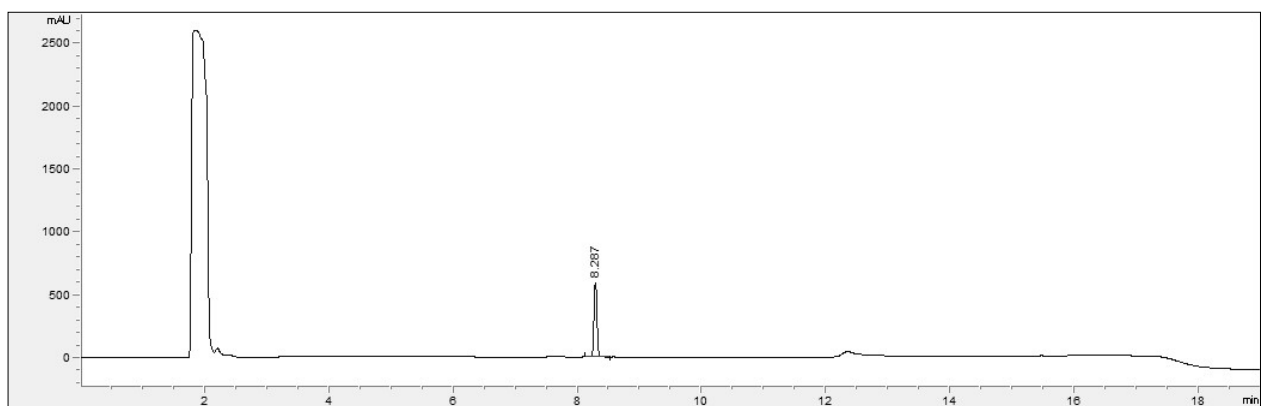

5-95% B, 15 min

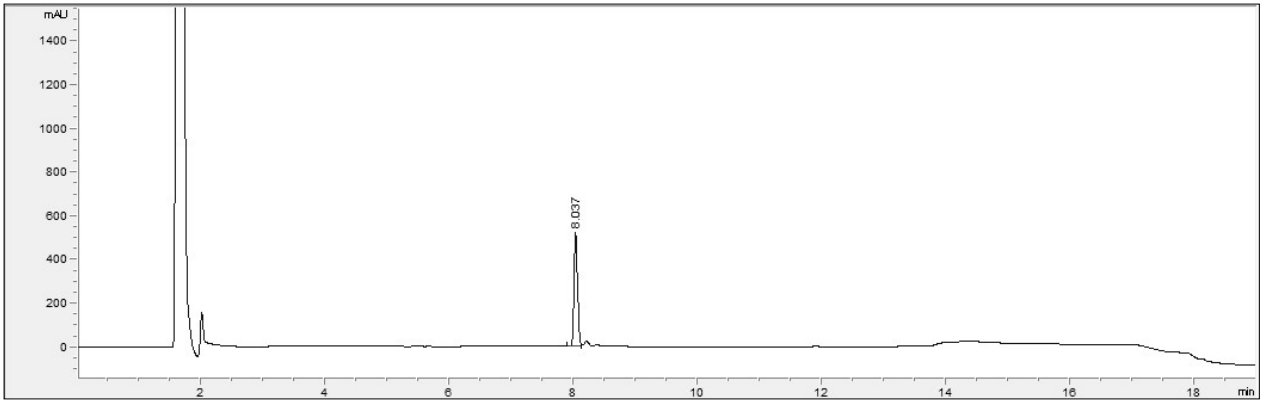

20-60% B, 15 min

**P5C6**

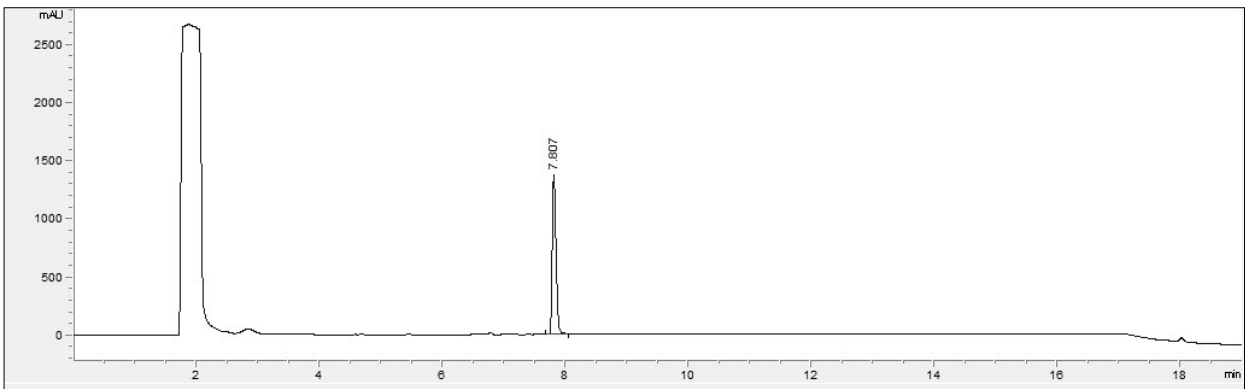

10-60% B, 15 min

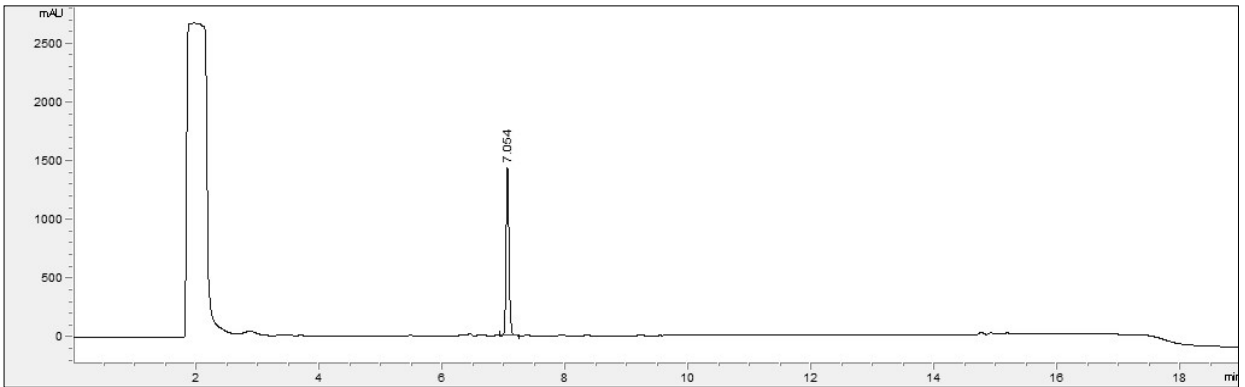

5-95% B, 15 min

**P5C7**

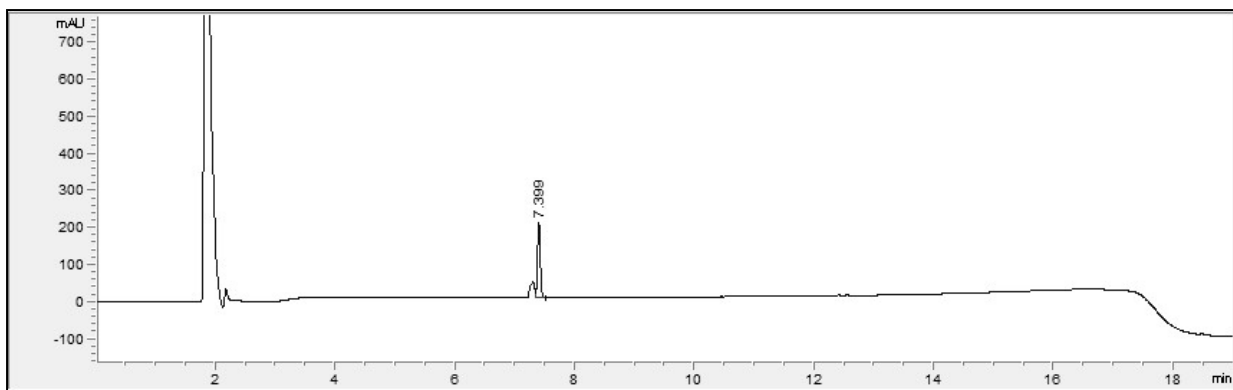

5-95% B, 15 min

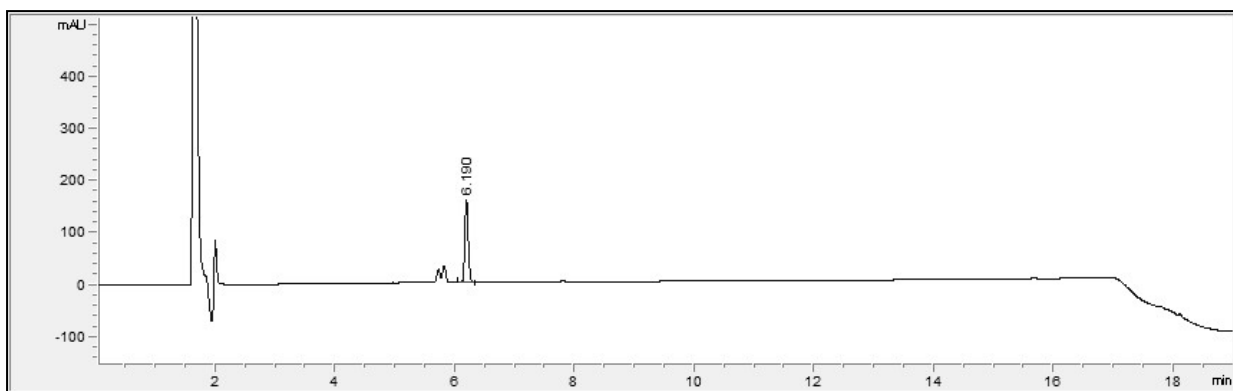

20-60% B, 15 min

### P6C2

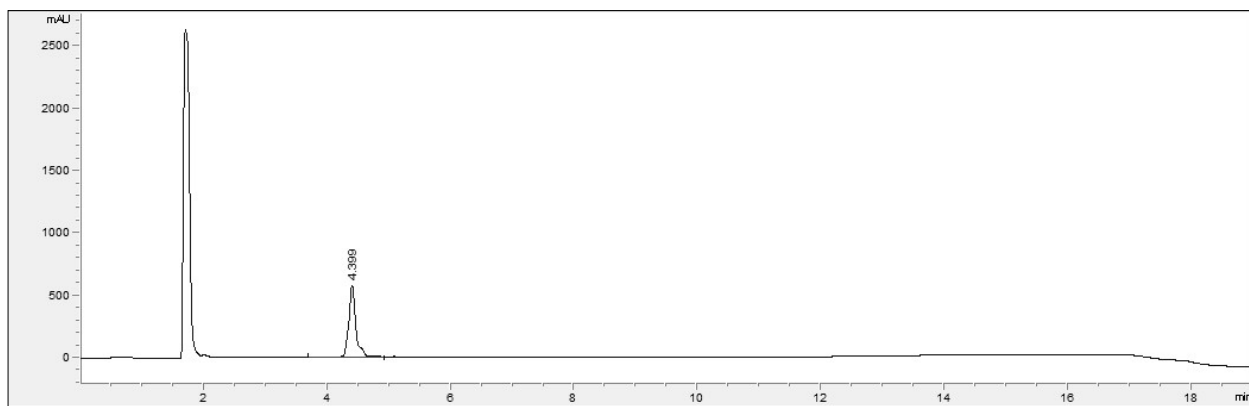

20-60% B, 15 min

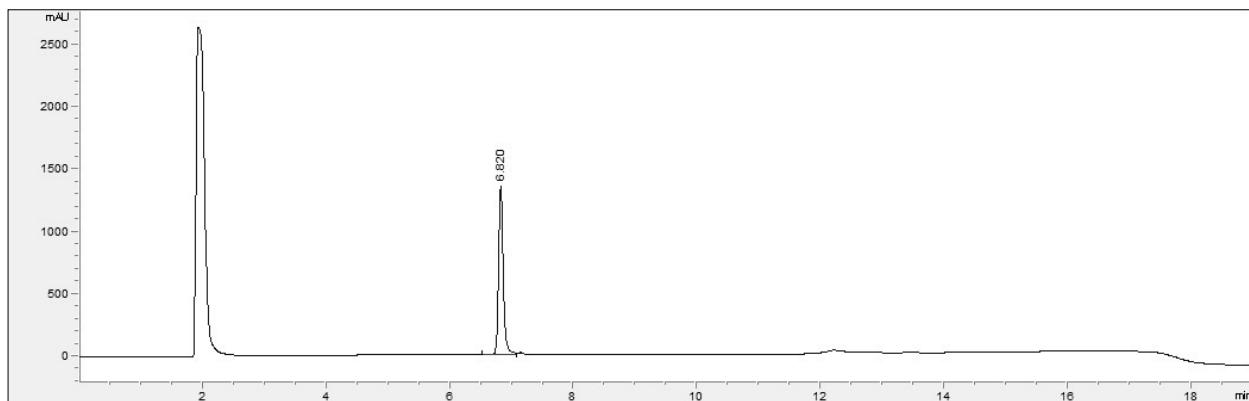

5-95% B, 15 min

**P6C3**

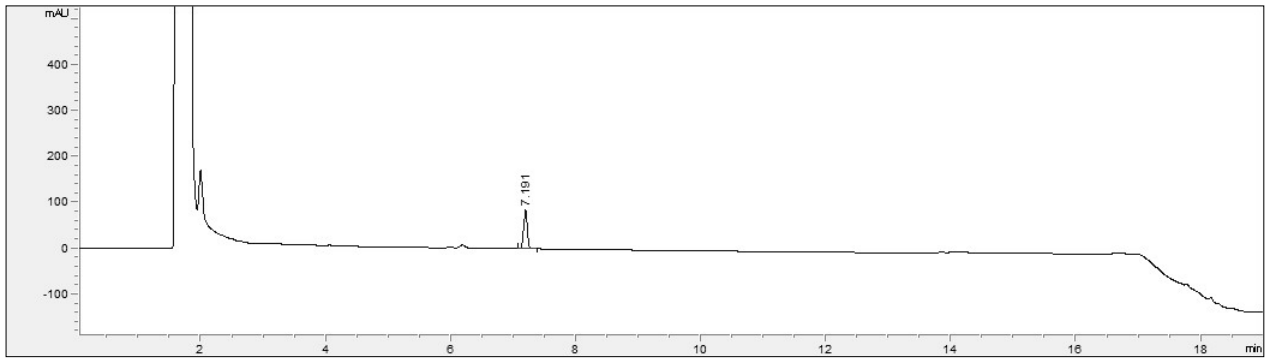

20-60% B, 15 min

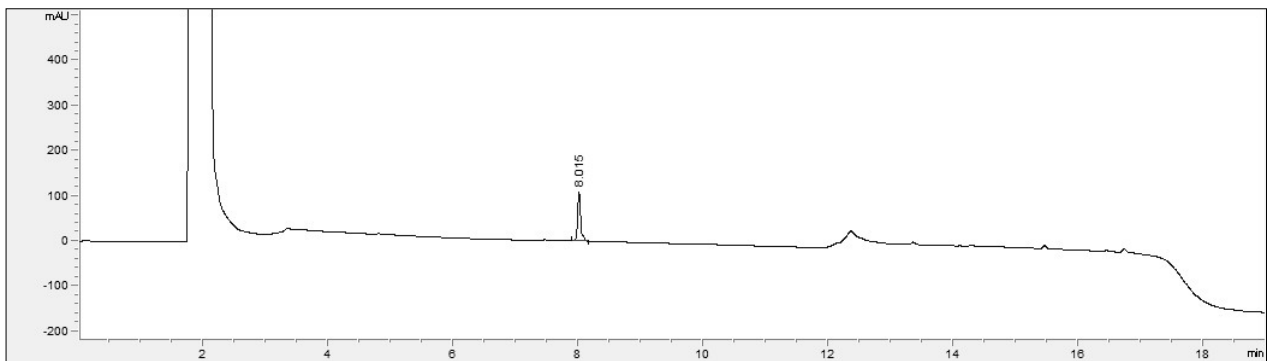

5-95% B, 15 min

**P7C8**

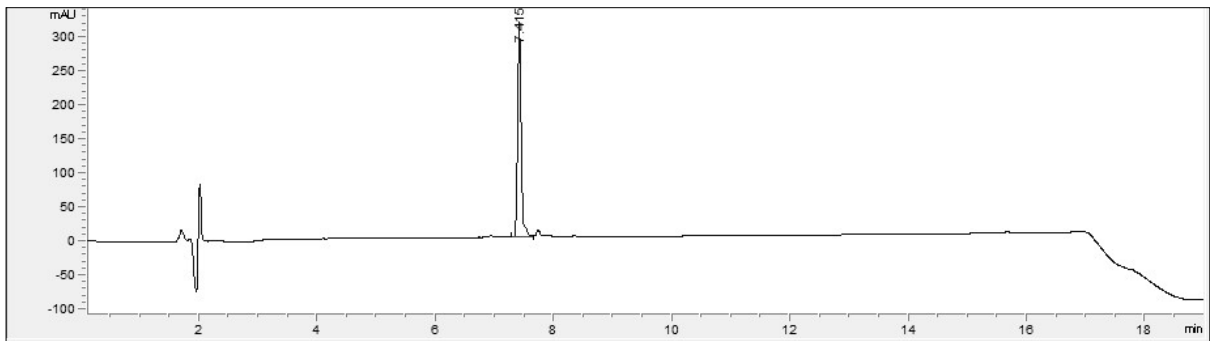

20-60% B, 15 min

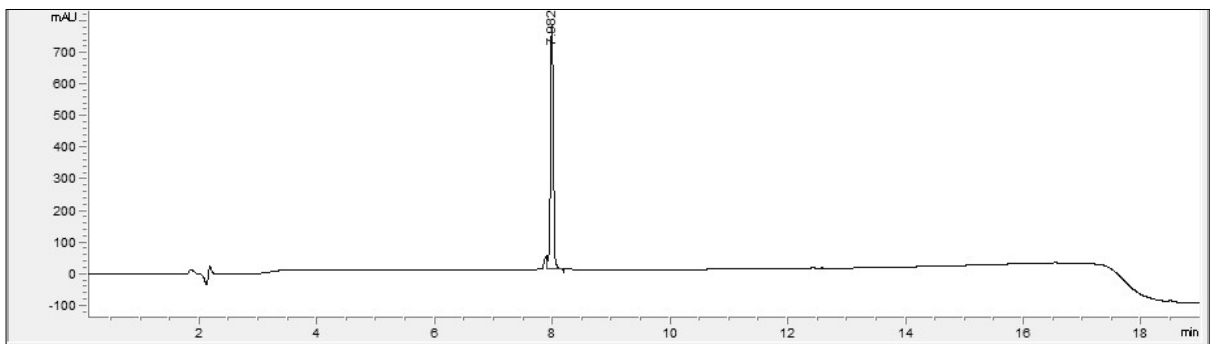

5-95% B, 15 min

**P8C9**



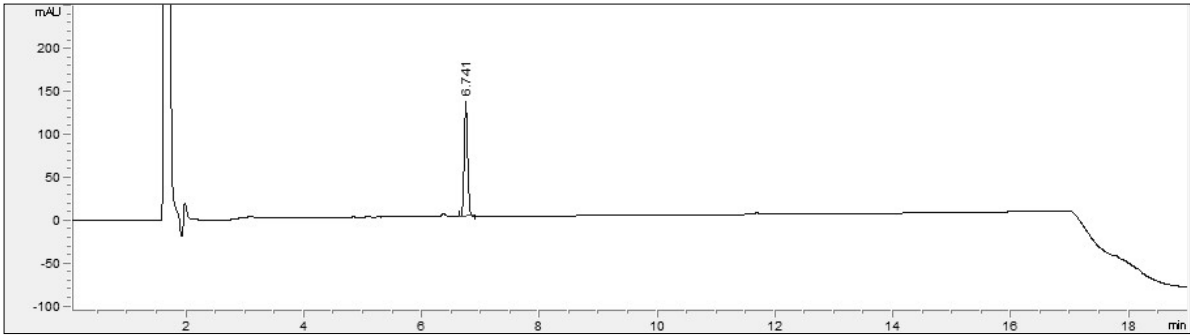

20-60% B, 15 min

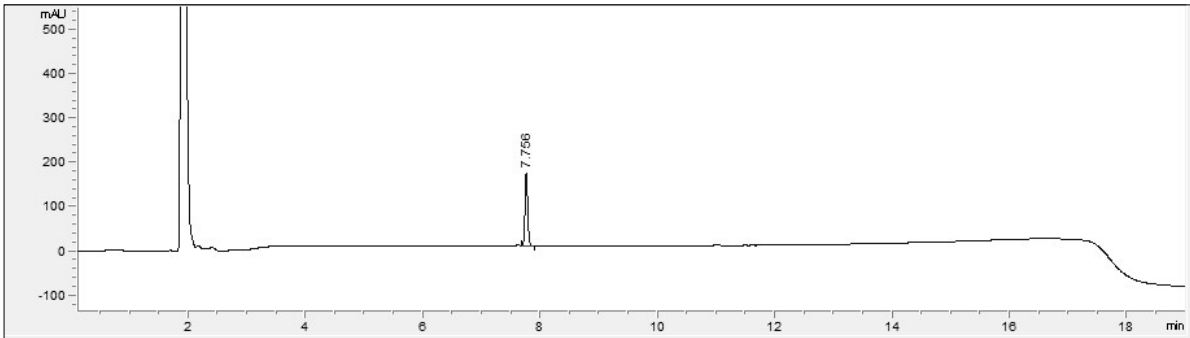

5-95% B, 15 min

**FA-P8**

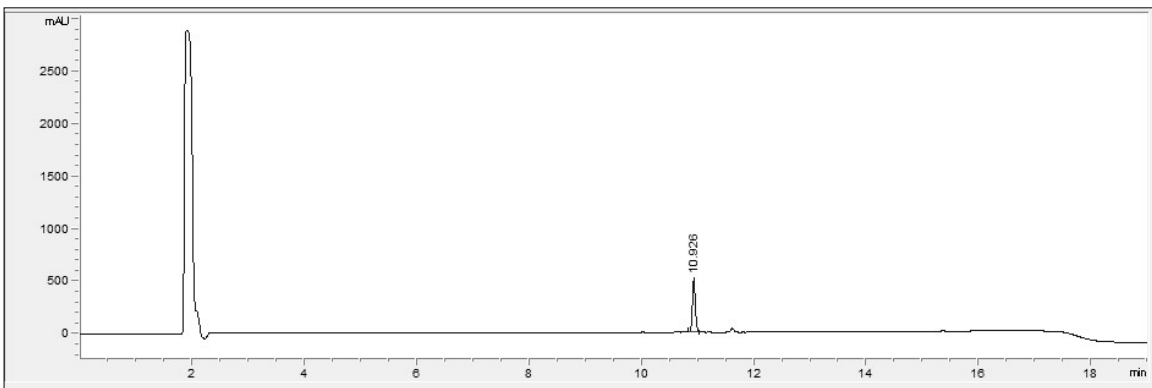

5-95% B, 15 min

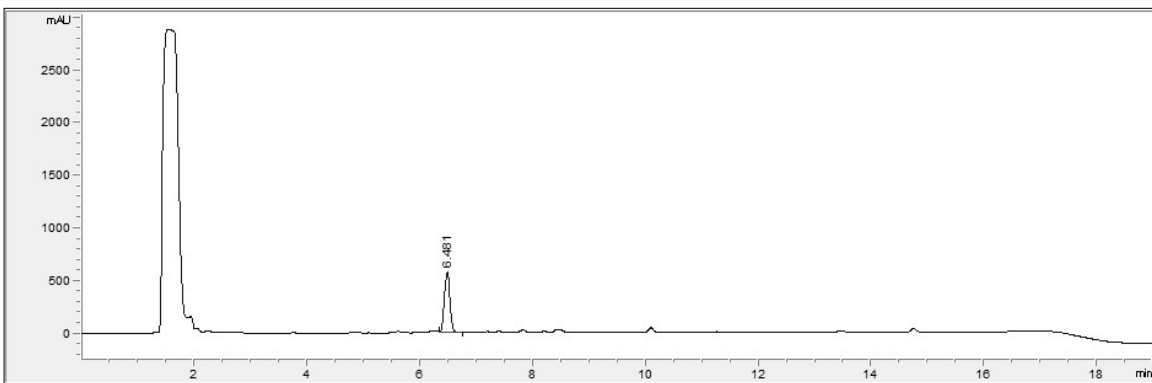

40-80% B, 15 min

**FA-P8C9**

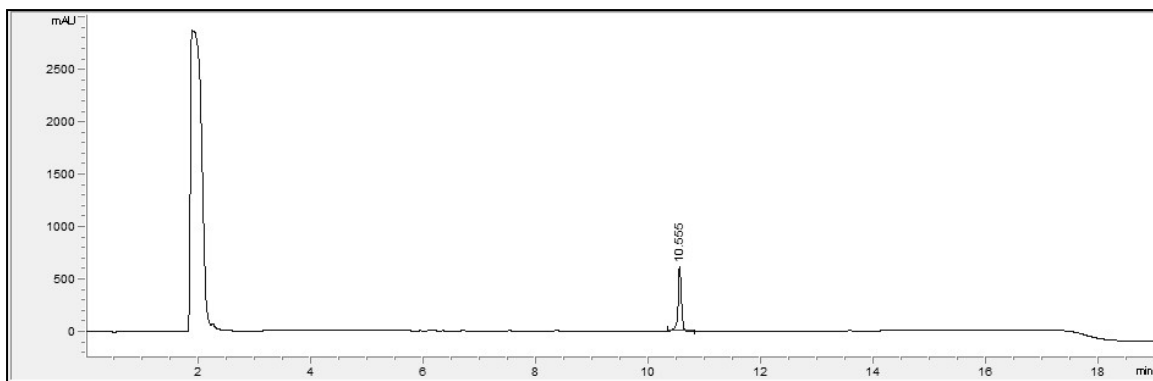

5-95% B, 15 min

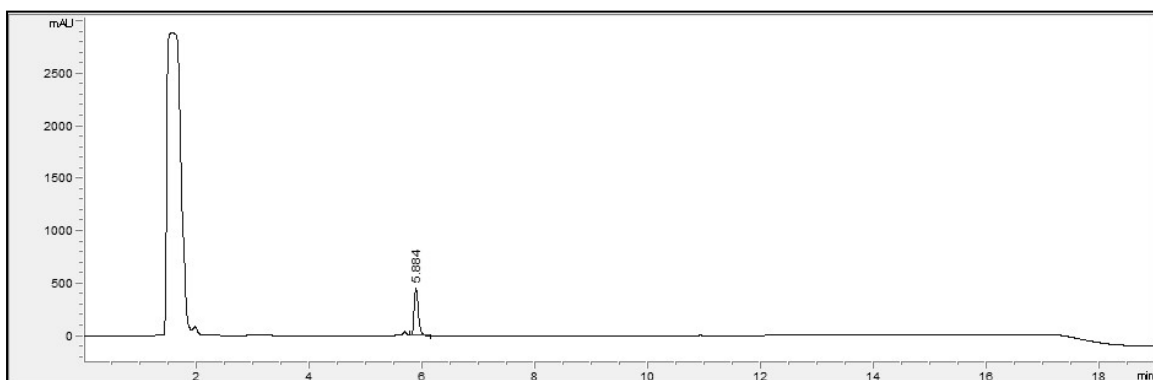

40-80% B, 15 min

### PEG-P8

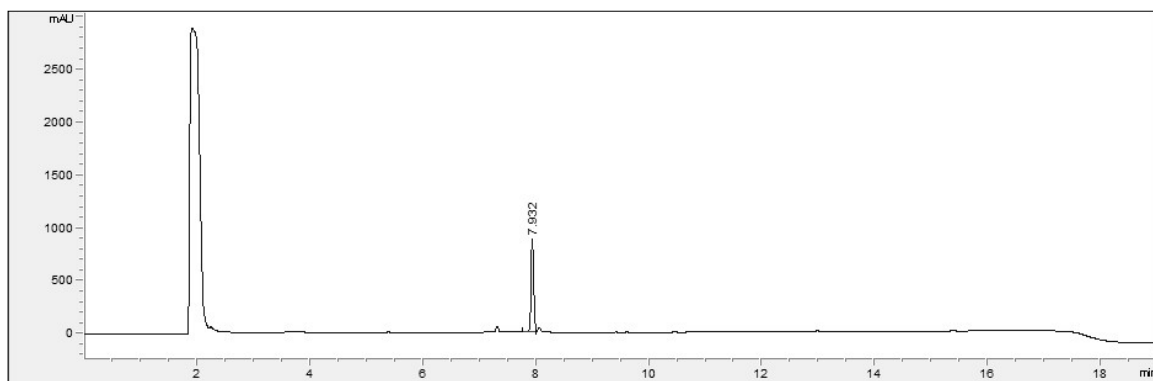

5-95% B, 15 min

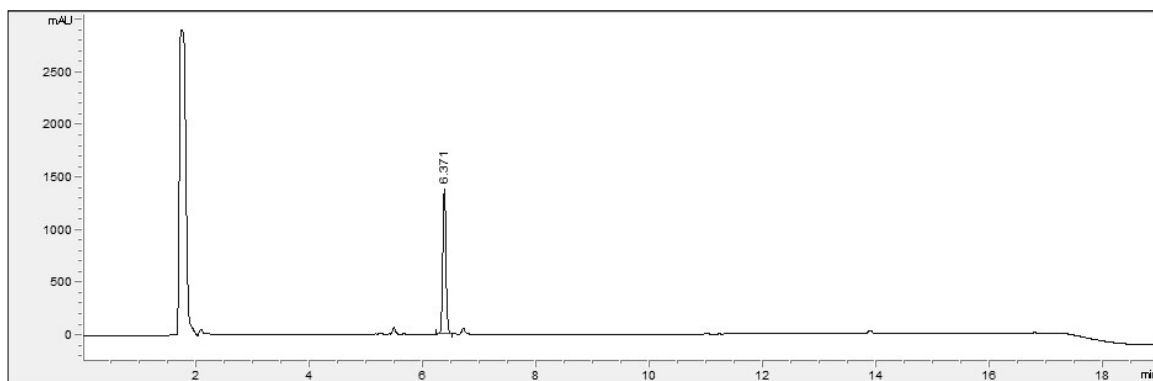

20-80% B, 15 min

### PEG-P8C9

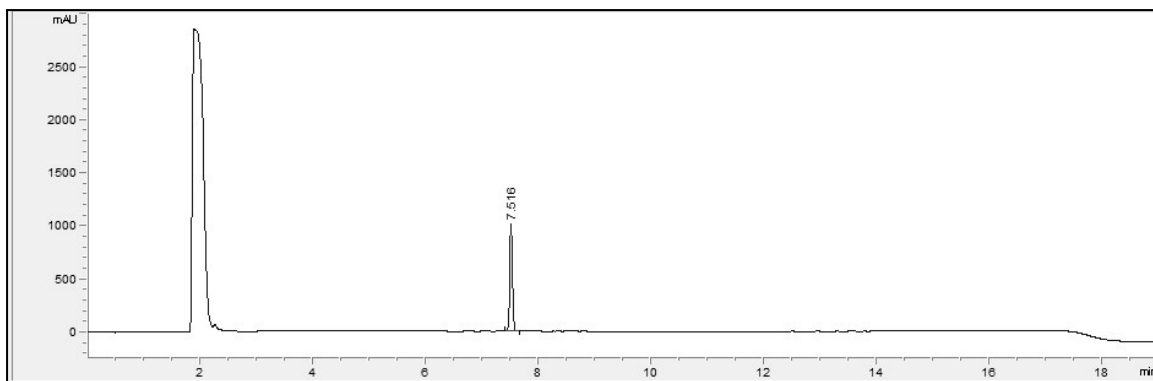

5-95% B, 15 min

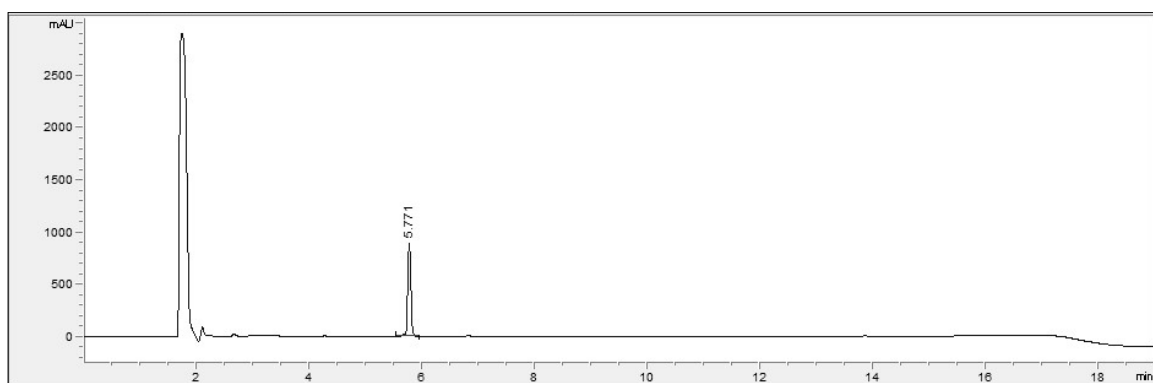

20-80% B, 15 min

**P8[FA]**

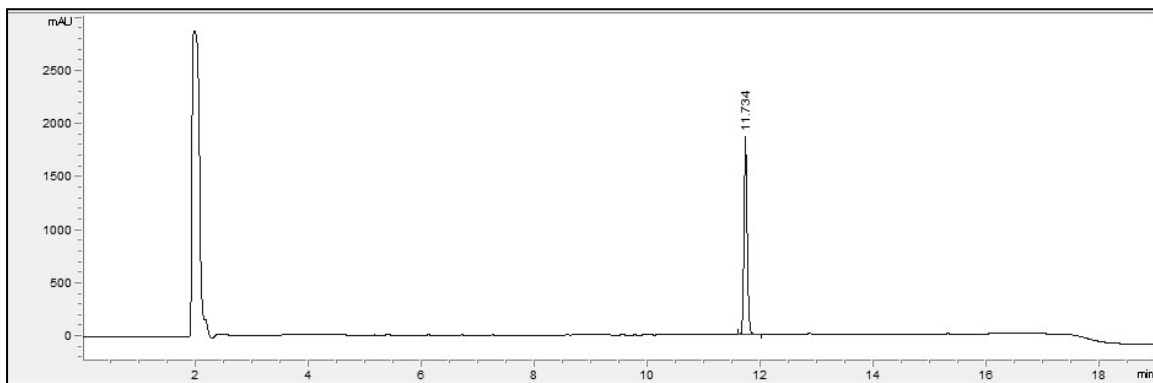

5-95% B, 15 min

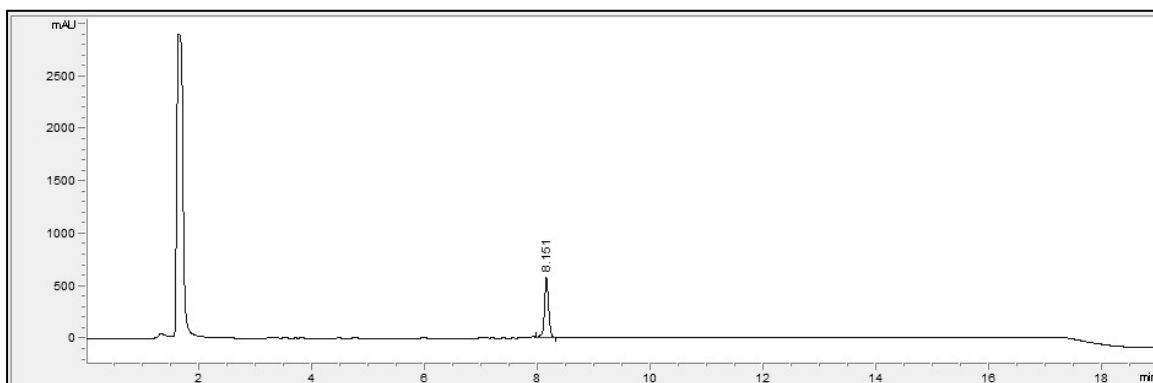

40-80% B, 15 min

**P8C9[FA]**

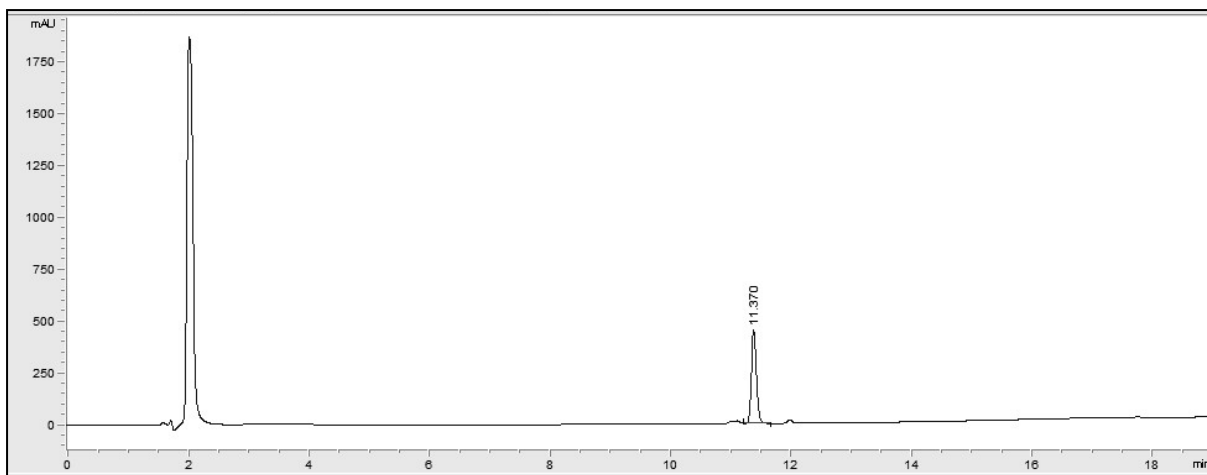

5-95% B, 15 min

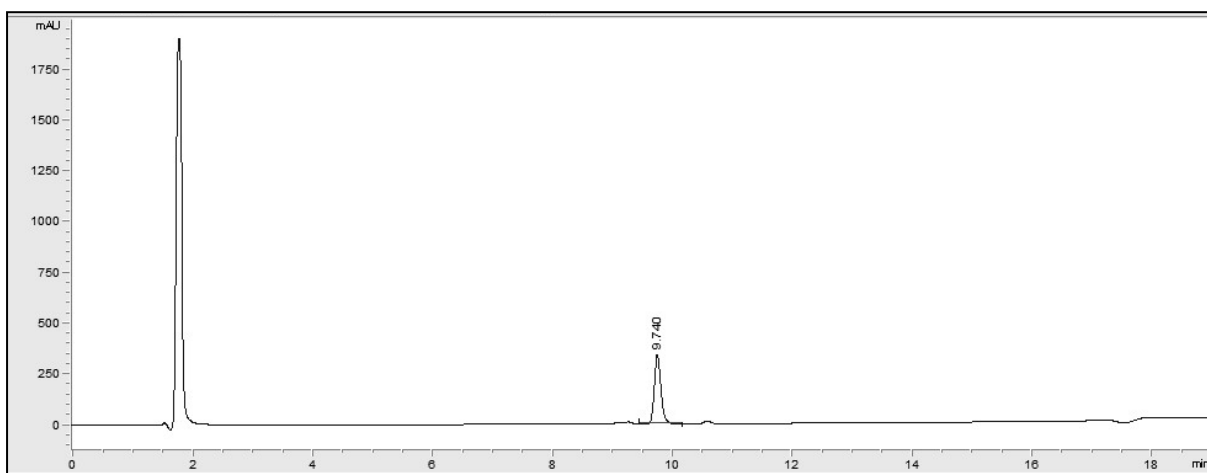

30-80% B, 15 min

### P8[PEG]

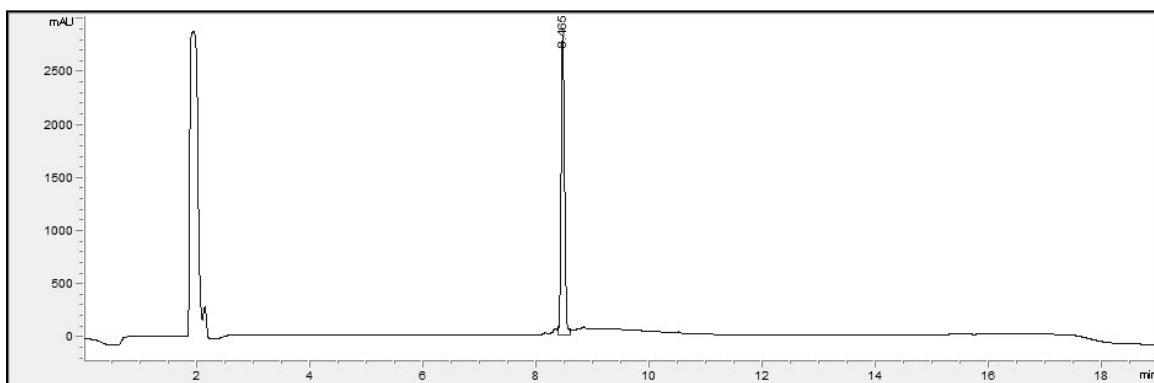

5-95% B, 15 min

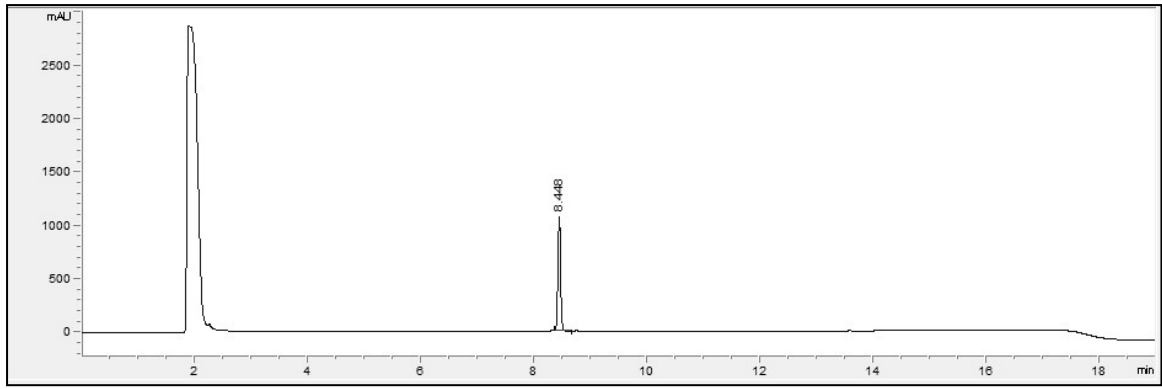

10-60% B, 15 min

**P8C9[PEG]**

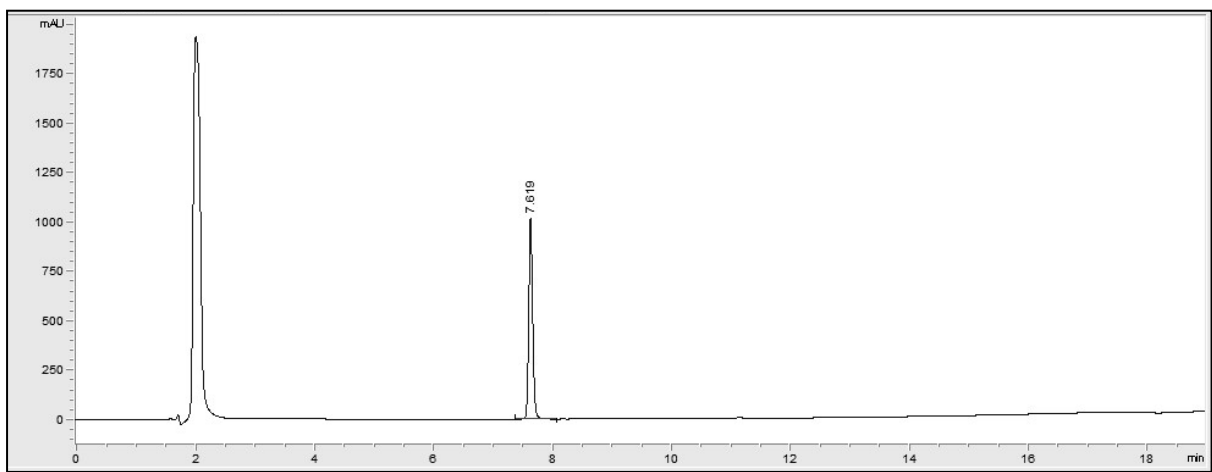

5-95% B, 15 min

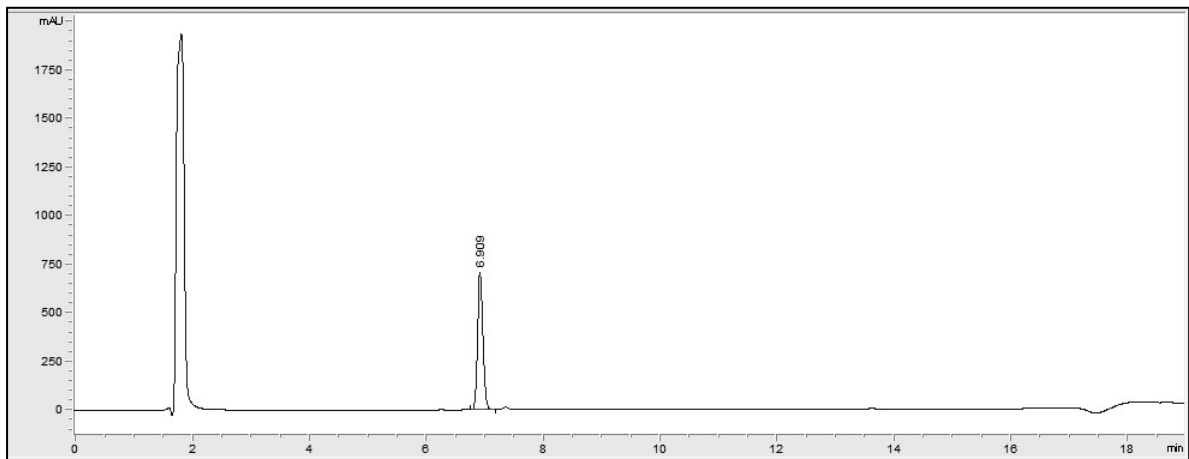

20-60% B, 15 min

**TAT-P8**

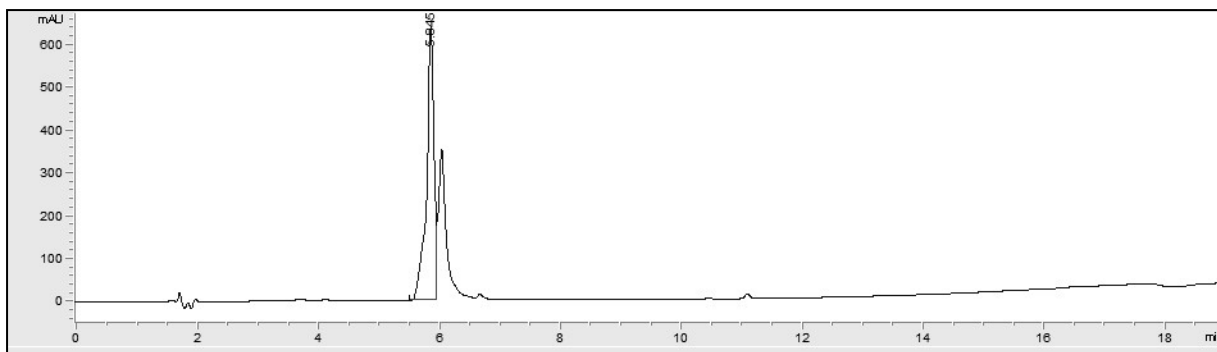

5-95% B, 15 min

### TAT-P8C9

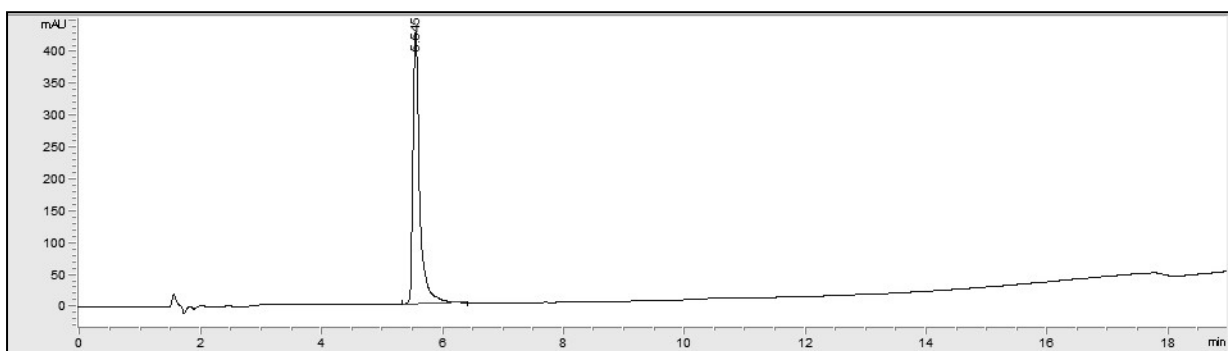

5-95% B, 15 min

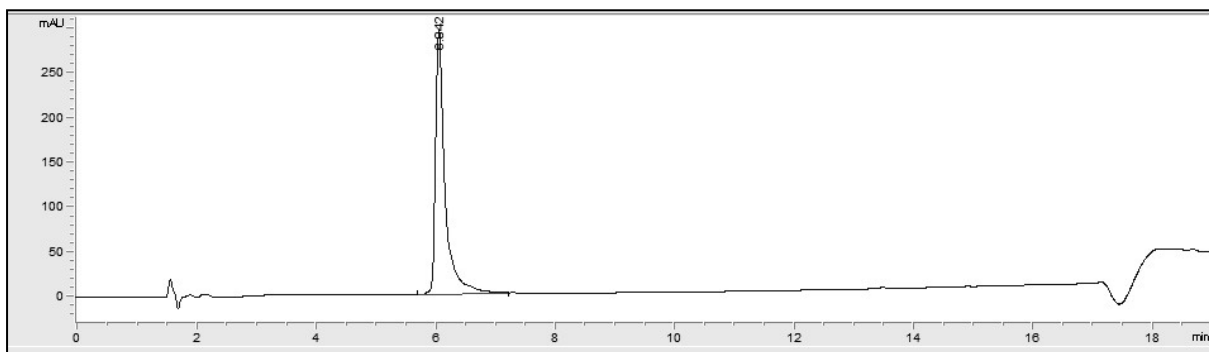

10-60% B, 15 min

### TAT-(Ahx)<sub>2</sub>

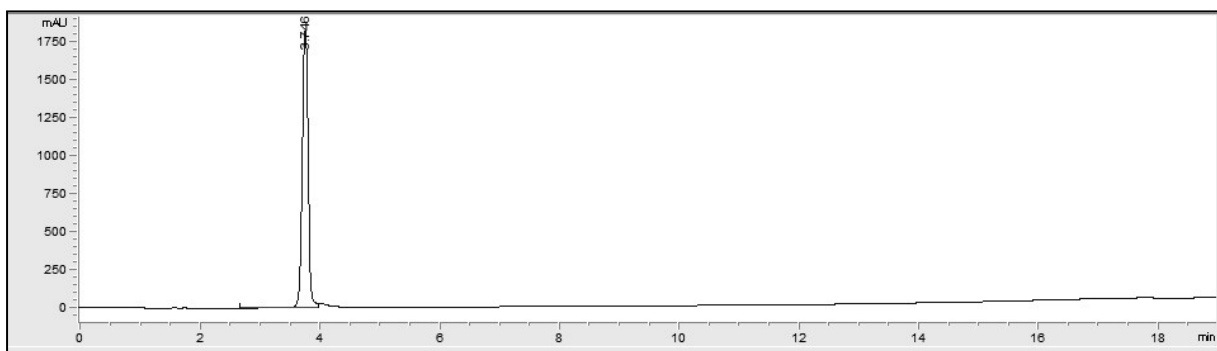

5-95% B, 15 min

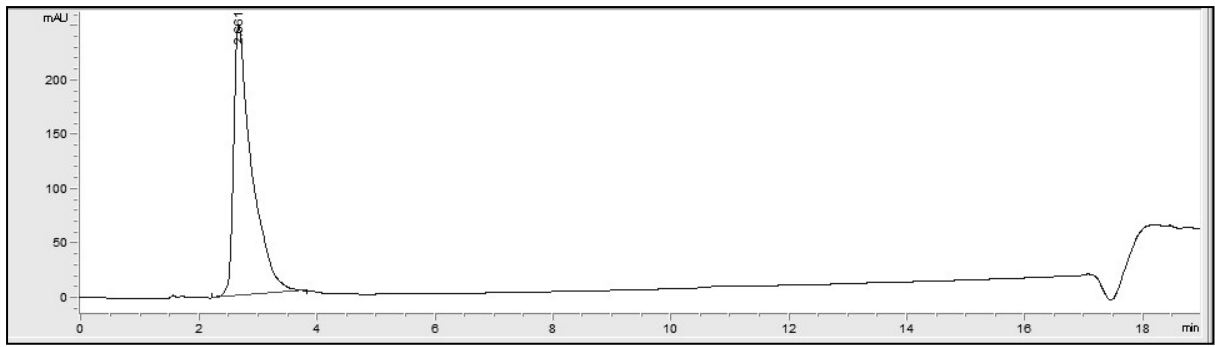

10-60% B, 15 min

**R3-P8**

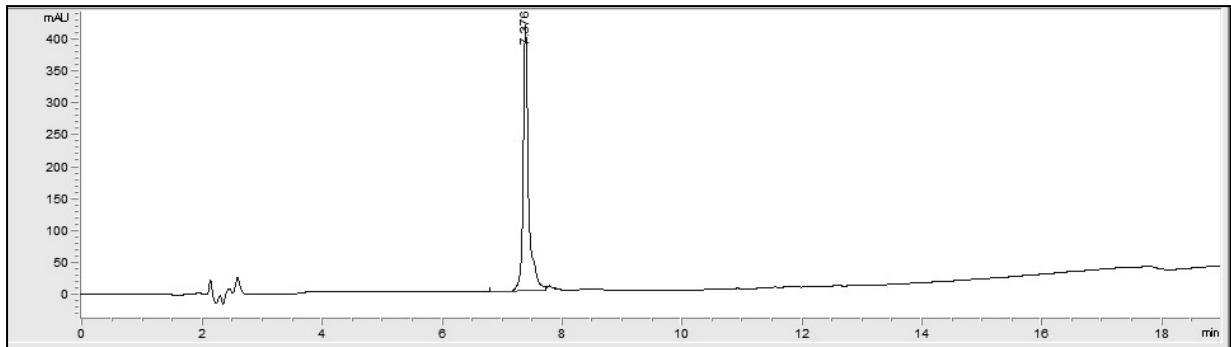

5-95% B, 15 min

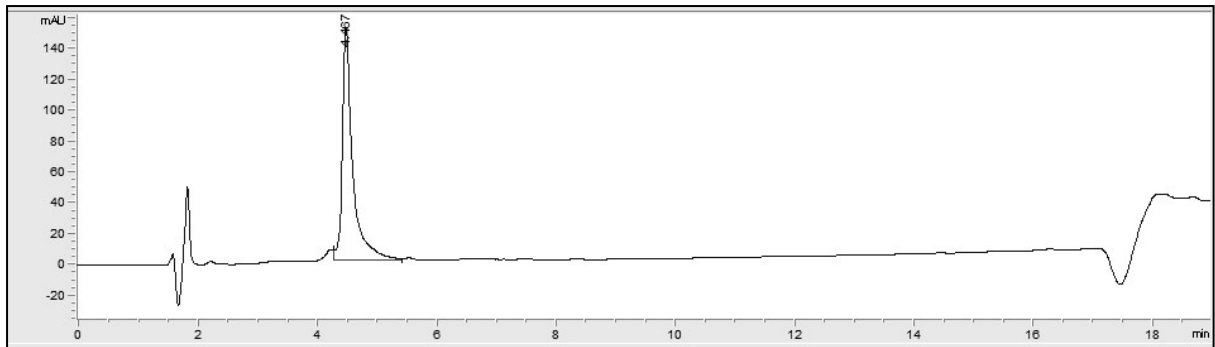

20-60% B, 15 min

**R3-P8C9**

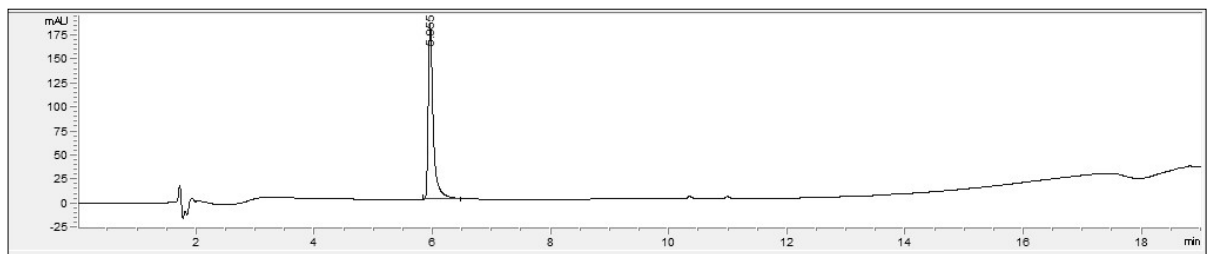

5-95% B, 15 min

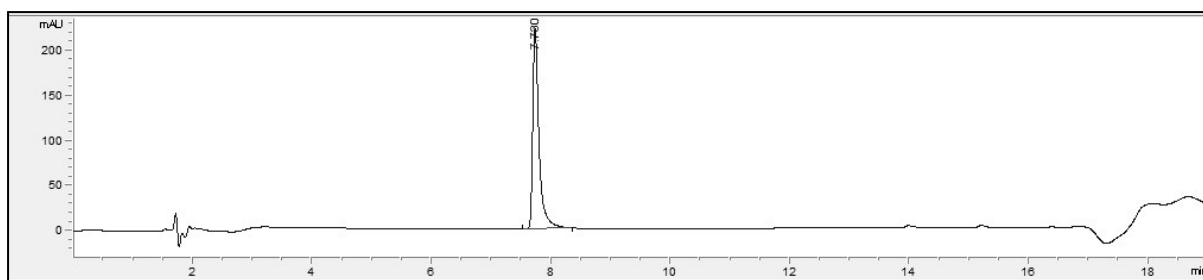

20-60% B, 15 min

### R3-(Ahx)<sub>2</sub>

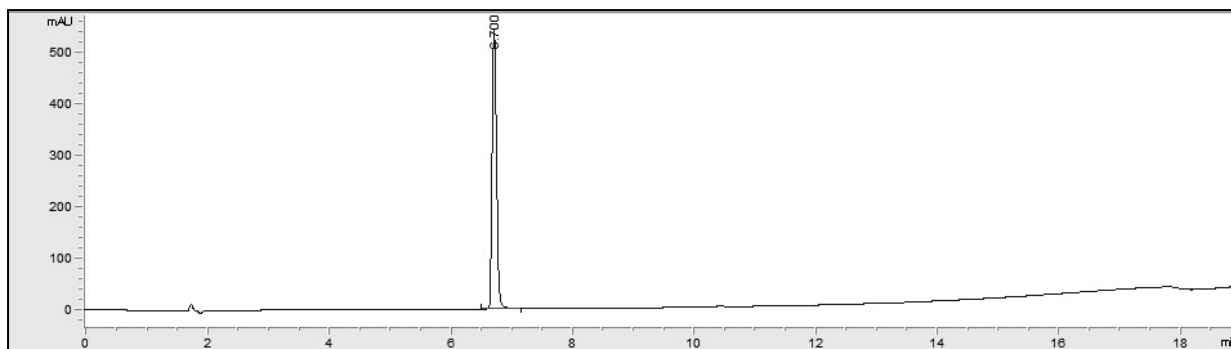

5-95% B, 15 min

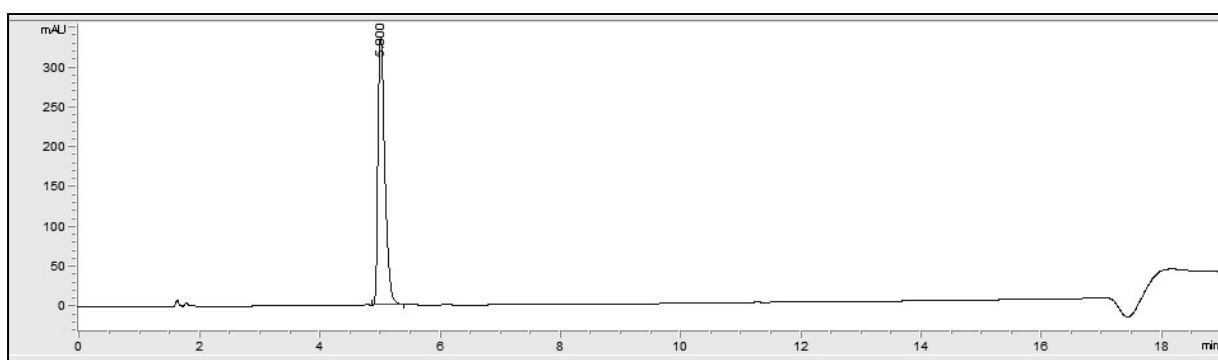

20-60% B, 15 min

### 1.3 Molecular modelling of cyclic peptides

The structures of the cyclic peptides were modelled on the crystal structure of CAM7117 bound to CK2 $\alpha$  (PDB code: 6Q38) using the Maestro suite, produced by Schrödinger (version 12.6.149, Schrödinger, LLC, New York, NY). The constraint of CAM7117 was removed, along with the residues not retained in the shortened sequences, and the new constraint to be tested added using the build fragment function. The structure of the constraint was minimised with the OPLS\_2005 force field, using 100 iterations.<sup>15,16</sup> Of those investigated, the constraints that appeared not to disrupt the secondary structure of the peptide were chosen for further investigation.



## 1.4 Ligand efficiency

Ligand efficiency (LE) is a commonly used statistic to evaluate and compare the effectiveness of drug candidates.<sup>17</sup> Mathematically, it is related to the  $IC_{50}$  of the molecule, as well as the number of heavy atoms (non-hydrogen) it contains, as detailed in **Equation 1**.<sup>18</sup>

**Equation 1** Mathematical expression for the ligand efficiencies of compounds.<sup>18</sup>  $pIC_{50} = -\log_{10}(IC_{50})$

$$LE = \frac{1.4 \times pIC_{50}}{\text{Number of non-H atoms}}$$

LE takes into account both the potency and size of molecules, to analyse which compounds exhibit the greatest activity with the fewest heavy atoms.

## 1.5 Biophysical experiments

### 1.5.1 Protein expression and purification

Three constructs of CK2 $\alpha$  were used in this study. For FP assays, CK2 $\alpha$ \_WT was used (residues 2-329). For ITC CK2 $\alpha$ \_KA construct was used whilst CK2 $\alpha$ \_FP10 was used for crystallisation purposes. CK2 $\alpha$ \_KA (residues 2-329) contained four mutations designed to aid crystallisation and solubility by reducing the overall charge of the protein; R21S, K74A, K75A and K76A. CK2 $\alpha$ \_FP 10 contained one mutation (R21S) and an *N*-terminal extension GSMDIEFDDDDADDDGSGSGSGSGS aimed at mimicking a substrate peptide for CK2 $\alpha$ . These constructs were cloned, expressed, and purified as previously described.<sup>19</sup>

### 1.5.2 Fluorescence polarisation

$IC_{50}$ 's were determined using a PHERAstar FS plate reader (BMG labtech). The fluorescein probe was measured using 485 nm excitation and 530 nm emission. The fluorescein probe was covalently linked to the *N*-terminus of the linear CK2 $\beta$ -based peptide RLYGFKIHPMAYQLQ.  $IC_{50}$ 's were measured using 500, 167, 16.7, 8.33 and 0  $\mu$ M of the test peptide at a constant concentration of DMSO. **P7C8**, **P8C9**, **P<sub>4</sub>** and **P<sub>+</sub>** were tested at concentrations of 50.0, 16.7, 1.67, 0.833 and 0  $\mu$ M due to their higher potencies. The experiments were performed in a Corning 384-well plate with final concentrations of 571 nM CK2 $\alpha$ \_WT (residues 2-329), 7.4  $\mu$ M fluorescent peptide (fluorescein probe was covalently linked to the *N*-terminus of the linear CK2 $\beta$ -based peptide RLYGFKIHPMAYQLQ), 200 mM NaCl, 40mM TRIS, 20 mM MgCl<sub>2</sub> and pH 7.5. The plates were read after a 45 min incubation period.

### 1.5.3 Isothermal titration calorimetry

All ITC experiments were performed at 25 °C using a MicroCal ITC-200 (GE Healthcare). CK2 $\alpha$ \_KA (20 mg/mL, 20 mM tris pH 8.0, 500 mM NaCl) was diluted in Tris buffer (200 mM, NaCl 300 mM, 10% DMSO) and concentrated to 20-50  $\mu$ M. Compounds in 100 $\times$  stock solutions were diluted into the same

buffer. In a typical experiment CK2 $\alpha$  (25  $\mu$ M) was loaded into the sample cell and 19 injections (2  $\mu$ L each) with a 2 second duration were performed at 150 second intervals. The syringe was loaded with 200-250  $\mu$ M peptides and rotated at 750 rpm. Control titrations were performed, and the data fitting was performed with a single site binding model using Origin software.

#### 1.5.4 X-ray crystallography

Co-crystals of CK2 $\alpha$  and stapled peptide were generated by screening CK2 $\alpha$ \_FP10 at 10 mg/mL in 20 mM Tris, pH 8.0, 500 mM NaCl and 500  $\mu$ M stapled peptide with the BCS, JCSG+ and Wizard I&II crystallisation screens (molecular dimensions). Crystallography was performed as previously described.<sup>4</sup> All coordinates have been deposited to Protein Data Bank and accession numbers, data collection and refinement statistics are shown in Table S4.

**Table S4** X-ray crystallography details including accession numbers, data collection and refinement statistics.

|                    | <b>P7C8</b>                       | <b>P8C9</b>                  |
|--------------------|-----------------------------------|------------------------------|
| pdb code           | 7QUX                              | 6YZH                         |
| Beamline           | i04                               | i03                          |
| Wavelength         | 0.9795                            | 0.9762                       |
| Resolution range   | 55.66 - 1.48 (1.533 - 1.48)       | 55.19 - 1.19 (1.19 - 1.22)   |
| Space group        | P 1 21 1                          | P 1 21 1                     |
| Unit cell          | 57.461 63.25 58.672 90 108.439 90 | 56.51 65.038 59 90 111.21 90 |
| Total reflections  | 1135374 (56487)                   | 3079974 (94416)              |
| Unique reflections | 66313 (3314)                      | 128134 (6408)                |
| Multiplicity       | 17.1 (17.0)                       | 24.0 (14.7)                  |
| Completeness (%)   | 99.7 (99.1)                       | 94.1 (56.0)                  |
| Mean I/sigma(I)    | 18.0 (0.6)                        | 22.8 (1.4)                   |
| Wilson B-factor    | 25.6                              | 14.22                        |
| R-merge            | 0.076 (4.711)                     | 0.063 (1.520)                |
| R-meas             | 0.079 (5.090)                     | 0.066 (1.630)                |
| R-pim              | 0.019 (1.220)                     | 0.018 (0.574)                |

|                                |                          |                            |
|--------------------------------|--------------------------|----------------------------|
| CC1/2                          | 1.0 (0.326)              | 1.0 (0.603)                |
| <u>Refinement</u>              |                          |                            |
| Resolution range               | 55.66-1.48 (1.518-1.480) | 55.19 - 1.11 (1.19 - 1.22) |
| Reflections used in refinement | 62522 (4296)             | 110272(4195)               |
| Reflections used for R-free    | 3442 (262)               | 5925(218)                  |
| R-work                         | 0.1797 (0.398)           | 0.172(0.321)               |
| R-free                         | 0.2037 (0.359)           | 0.190 (0.3310)             |
| Number of non-hydrogen atoms   | 3231                     | 3235                       |
| macromolecules                 | 2893                     | 2938                       |
| ligands                        | 49                       | 46                         |
| solvent                        | 289                      | 251                        |
| Protein residues               | 338                      | 348                        |
| RMS(bonds)                     | 0.015                    | 0.015                      |
| RMS(angles)                    | 1.85                     | 1.65                       |
| Ramachandran favored (%)       | 95.77                    | 96.78                      |
| Ramachandran allowed (%)       | 4.23                     | 2.92                       |
| Ramachandran outliers (%)      | 0                        | 0.29                       |
| Rotamer outliers (%)           | 0.64                     | 2.86                       |
| Clashscore                     | 3.62                     | 2.55                       |

|                  |       |       |
|------------------|-------|-------|
| Average B-factor | 35.31 | 22.29 |
| macromolecules   | 34.78 | 21.87 |
| ligands          | 33.04 | 16.45 |
| solvent          | 41    | 28.22 |

---

## 1.6 Cellular biology

### 1.6.1 Cell culture

HeLa cells were maintained in 5% CO<sub>2</sub> in DMEM supplemented with 10% FBS, 2 mM L-glutamine, 100 U/mL penicillin and 100 mM streptomycin, in an atmosphere containing 5% CO<sub>2</sub>.

Cells were regularly passed and used for experiments within one month after thawing (10-15 passages).

### 1.6.2 Cell viability assay

Cell viability was assayed by 3-(4,5-dimethylthiazol-2-yl)-2,5-diphenyltetrazolium bromide (MTT) colorimetric assay. HeLa cells were plated on 96-well plates (20,000 cells per well in 100  $\mu$ L). After 24 h, cells were treated with different concentrations of test compounds or vehicle alone (DMSO). One hour before the end of the incubations, 10  $\mu$ L of MTT solution (5 mg/mL in PBS) were added to each well. Formazan crystals (proportional to the number of viable cells) were then dissolved by the addition of 20  $\mu$ L/well of a pH 4.7 solution containing 20% (w:v) SDS, 50% (v:v) *N,N*-dimethylformamide, 2% (v:v) acetic acid, and 25 mM HCl, and quantified by recording the absorbance at 570 nm using an Infinite M200 PRO plate reader (TECAN, Life Sciences). The test was performed in quadruplicate.

### 1.6.3 Serum stability test

500  $\mu$ L of PBS buffer supplemented with 20% (v/v) of human serum was allocated into an Eppendorf tube and temperature kept at 37 °C for 15 minutes before commencing the experiment. 5  $\mu$ L of the peptide from 10 mM stock solution in DMSO was added. Caffeine was added as an internal standard (10  $\mu$ L of a 15 mg/mL solution in MQ water). At specific intervals, 50  $\mu$ L of the reaction mixture was taken and quenched with 100  $\mu$ L of a 1:1 mixture of 96% Ethanol:DMSO. The suspension was spun at 13400 g for 10 minutes. 100  $\mu$ L of the supernatant was analysed using C-18 HPLC with an eluting gradient 5-95% MeCN (0.05% TFA) in water (0.05% TFA) over 15 minutes (90  $\mu$ L injection volume). Percentage of intact starting peptide was monitored over 24 h (calculated as the ratio of the area of

the peak corresponding to the intact peptide to the area of the peak of caffeine). The experiment was performed in duplicates.

## 1.7 References

- 1 M. M. Wiedmann, Y. S. Tan, Y. Wu, S. Aibara, W. Xu, H. F. Sore, C. S. Verma, L. Itzhaki, M. Stewart, J. D. Brenton and D. R. Spring, *Angew. Chemie Int. Ed.*, 2017, **56**, 524–529.
- 2 Y. Lau and D. Spring, *Synlett*, 2011, **2011**, 1917–1919.
- 3 G. T. Potter, G. C. Jayson, G. J. Miller and J. M. Gardiner, *J. Org. Chem.*, 2016, **81**, 3443–3446.
- 4 J. Iegre, P. Brear, D. J. Baker, Y. S. Tan, E. L. Atkinson, H. F. Sore, D. H. O’ Donovan, C. S. Verma, M. Hyvönen and D. R. Spring, *Chem. Sci.*, 2019, **10**, 5056–5063.
- 5 K. Matsuda, M. T. Stone and J. S. Moore, *J. Am. Chem. Soc.*, 2002, **124**, 11836–11837.
- 6 J. S. Parker, H. F. Sore, D. R. Spring and S. J. Walsh, *WO2020025108A1*, 2020-02–06.
- 7 C. Puig Duran, F. Albericio Palomera, M. Gongora Benitez, M. Paradis Bas, L. Miret Casals, I. Ramos Tomillero, S. Fiacco, A. Davis, S. Geschwindner, O. Brun Cubero, C. Heras Paniagua and N. Trallero Canela, *WO/2019/030298*, 2019-02–14.
- 8 Y. H. Lau, Y. Wu, P. de Andrade, W. R. J. D. Galloway and D. R. Spring, *Nat. Protoc.*, 2015, **10**, 585–594.
- 9 N. Assem, D. J. Ferreira, D. W. Wolan and P. E. Dawson, *Angew. Chemie Int. Ed.*, 2015, **54**, 8665–8668.
- 10 C. M. B. K. Kourra and N. Cramer, *Chem. Sci.*, 2016, **7**, 7007–7012.
- 11 N. S. Robertson, S. J. Walsh, E. Fowler, M. Yoshida, S. M. Rowe, Y. Wu, H. F. Sore, J. S. Parker and D. R. Spring, *Chem. Commun.*, 2019, **55**, 9499.
- 12 S. J. Walsh, J. Iegre, H. Seki, J. D. Bargh, H. F. Sore, J. S. Parker, J. S. Carroll and D. R. Spring, *Org. Biomol. Chem*, 2020, **18**, 4224.
- 13 S. Ingale and P. E. Dawson, *Org. Lett.*, 2011, **13**, 2822–2825.
- 14 M. Empting, O. Avrutina, R. Meusinger, S. Fabritz, M. Reinwarth, M. Biesalski, S. Voigt, G. Buntkowsky and H. Kolmar, *Angew. Chemie Int. Ed.*, 2011, **50**, 5207–5211.
- 15 W. L. Jorgensen, D. S. Maxwell and J. Tirado-Rives, *J. Am. Chem. Soc.*, 1996, **118**, 11225–11236.
- 16 E. Harder, W. Damm, J. Maple, C. Wu, M. Reboul, J. Y. Xiang, L. Wang, D. Lupyan, M. K.

- Dahlgren, J. L. Knight, J. W. Kaus, D. S. Cerutti, G. Krilov, W. L. Jorgensen, R. Abel and R. A. Friesner, *J. Chem. Theory Comput.*, 2016, **12**, 281–296.
- 17 A. L. Hopkins, G. M. Keserü, P. D. Leeson, D. C. Rees and C. H. Reynolds, *Nat. Rev. Drug Discov.*, 2014, **13**, 105–121.
- 18 M. D. Shultz, *Bioorg. Med. Chem. Lett.*, 2013, **23**, 5980–5991.
- 19 P. Brear, C. De Fusco, K. Hadje Georgiou, N. J. Francis-Newton, C. J. Stubbs, H. F. Sore, A. R. Venkitaraman, C. Abell, D. R. Spring and M. Hyvönen, *Chem. Sci.*, 2016, **7**, 6839–6845.
